# Supplementary material for: Impact of social restrictions during the COVID-19 pandemic on the physical activity levels of adults aged 50–92 years: a baseline survey of the CHARIOT COVID-19 Rapid Response prospective cohort study
Source: PubMed Central journal article supplement (PMC8390149; doi:10.1136/bmjopen-2021-050680), 2021-08-25
Supplement: bmjopen-2021-050680.draft_revisions.pdf [file bmjopen-2021-050680.draft_revisions.pdf]

# BMJ Open

BMJ Open is committed to open peer review. As part of this commitment we make the peer review history of every article we publish publicly available.

When an article is published we post the peer reviewers' comments and the authors' responses online. We also post the versions of the paper that were used during peer review. These are the versions that the peer review comments apply to.

The versions of the paper that follow are the versions that were submitted during the peer review process. They are not the versions of record or the final published versions. They should not be cited or distributed as the published version of this manuscript.

BMJ Open is an open access journal and the full, final, typeset and author-corrected version of record of the manuscript is available on our site with no access controls, subscription charges or pay-per-view fees (<http://bmjopen.bmj.com>).

If you have any questions on BMJ Open's open peer review process please email [info.bmjopen@bmj.com](mailto:info.bmjopen@bmj.com)

# BMJ Open

**The impact of social restrictions during the COVID-19 pandemic on the physical activity levels of older adults: a baseline analysis of the CHARIOT COVID-19 Rapid Response prospective cohort study**

|                               |                                                                                                                                                                                                                                                                                                                                                                                                                                                                                                                                                                                                                                                                                                                                                                                                                                                                                                                                                                                                                                                                                                                                                                                                                                                                                                                                                                                                                                                                                                            |
|-------------------------------|------------------------------------------------------------------------------------------------------------------------------------------------------------------------------------------------------------------------------------------------------------------------------------------------------------------------------------------------------------------------------------------------------------------------------------------------------------------------------------------------------------------------------------------------------------------------------------------------------------------------------------------------------------------------------------------------------------------------------------------------------------------------------------------------------------------------------------------------------------------------------------------------------------------------------------------------------------------------------------------------------------------------------------------------------------------------------------------------------------------------------------------------------------------------------------------------------------------------------------------------------------------------------------------------------------------------------------------------------------------------------------------------------------------------------------------------------------------------------------------------------------|
| Journal:                      | <i>BMJ Open</i>                                                                                                                                                                                                                                                                                                                                                                                                                                                                                                                                                                                                                                                                                                                                                                                                                                                                                                                                                                                                                                                                                                                                                                                                                                                                                                                                                                                                                                                                                            |
| Manuscript ID                 | bmjopen-2021-050680                                                                                                                                                                                                                                                                                                                                                                                                                                                                                                                                                                                                                                                                                                                                                                                                                                                                                                                                                                                                                                                                                                                                                                                                                                                                                                                                                                                                                                                                                        |
| Article Type:                 | Original research                                                                                                                                                                                                                                                                                                                                                                                                                                                                                                                                                                                                                                                                                                                                                                                                                                                                                                                                                                                                                                                                                                                                                                                                                                                                                                                                                                                                                                                                                          |
| Date Submitted by the Author: | 25-Feb-2021                                                                                                                                                                                                                                                                                                                                                                                                                                                                                                                                                                                                                                                                                                                                                                                                                                                                                                                                                                                                                                                                                                                                                                                                                                                                                                                                                                                                                                                                                                |
| Complete List of Authors:     | <p>Salman, David; Imperial College London Department of Primary Care and Public Health; Imperial College London, MSk lab, Department of Surgery and Cancer, Faculty of Medicine</p> <p>Beaney, Thomas; Imperial College London, Department of Primary Care and Public Health</p> <p>Robb, Catherine; Imperial College London, Ageing Epidemiology Research Unit (AGE), School of Public Health, Faculty of Medicine</p> <p>de-Jaegar Loots, Celeste; Imperial College London, Ageing Epidemiology Research Unit (AGE), School of Public Health, Faculty of Medicine</p> <p>Giannakopoulou, Parthenia; Imperial College London, Ageing Epidemiology Research Unit (AGE), School of Public Health, Faculty of Medicine</p> <p>Udeh-Momoh, Chinedu ; Imperial College London, Ageing Epidemiology Research Unit (AGE), School of Public Health, Faculty of Medicine</p> <p>Ahmadi-Abhari, Sara ; Imperial College London, Ageing Epidemiology Research Unit (AGE), School of Public Health, Faculty of Medicine</p> <p>Majeed, Azeem; Imperial College London, Department of Primary Care and Public Health; Imperial College Healthcare NHS Trust, Public Health Directorate</p> <p>Middleton, Lefkos; Imperial College London, Ageing Epidemiology Research Unit (AGE), School of Public Health, Faculty of Medicine; Imperial College Healthcare NHS Trust, Public Health Directorate</p> <p>McGregor, Alison; Imperial College London, MSk lab, Department of Surgery and Cancer, Faculty of Medicine</p> |
| Keywords:                     | COVID-19, PREVENTIVE MEDICINE, PUBLIC HEALTH, SPORTS MEDICINE, GERIATRIC MEDICINE                                                                                                                                                                                                                                                                                                                                                                                                                                                                                                                                                                                                                                                                                                                                                                                                                                                                                                                                                                                                                                                                                                                                                                                                                                                                                                                                                                                                                          |
|                               |                                                                                                                                                                                                                                                                                                                                                                                                                                                                                                                                                                                                                                                                                                                                                                                                                                                                                                                                                                                                                                                                                                                                                                                                                                                                                                                                                                                                                                                                                                            |

SCHOLARONE™  
Manuscripts

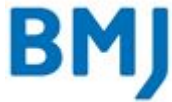

I, the Submitting Author has the right to grant and does grant on behalf of all authors of the Work (as defined in the below author licence), an exclusive licence and/or a non-exclusive licence for contributions from authors who are: i) UK Crown employees; ii) where BMJ has agreed a CC-BY licence shall apply, and/or iii) in accordance with the terms applicable for US Federal Government officers or employees acting as part of their official duties; on a worldwide, perpetual, irrevocable, royalty-free basis to BMJ Publishing Group Ltd ("BMJ") its licensees and where the relevant Journal is co-owned by BMJ to the co-owners of the Journal, to publish the Work in this journal and any other BMJ products and to exploit all rights, as set out in our [licence](#).

The Submitting Author accepts and understands that any supply made under these terms is made by BMJ to the Submitting Author unless you are acting as an employee on behalf of your employer or a postgraduate student of an affiliated institution which is paying any applicable article publishing charge ("APC") for Open Access articles. Where the Submitting Author wishes to make the Work available on an Open Access basis (and intends to pay the relevant APC), the terms of reuse of such Open Access shall be governed by a Creative Commons licence – details of these licences and which [Creative Commons](#) licence will apply to this Work are set out in our licence referred to above.

Other than as permitted in any relevant BMJ Author's Self Archiving Policies, I confirm this Work has not been accepted for publication elsewhere, is not being considered for publication elsewhere and does not duplicate material already published. I confirm all authors consent to publication of this Work and authorise the granting of this licence.

1  
2  
3 **The impact of social restrictions during the COVID-19 pandemic on the physical**  
4 **activity levels of older adults: a baseline analysis of the CHARIOT COVID-19 Rapid**  
5 **Response prospective cohort study**  
6

7 **David Salman**, academic clinical fellow in primary care\*<sup>1,2@</sup>, **Thomas Beaney**, academic  
8 clinical fellow in primary care\*<sup>2@</sup>, **Catherine E. Robb**, postgraduate research associate\*<sup>3</sup>,  
9 Celeste A. de Jager Loots, research fellow<sup>3</sup>, Parthenia Giannakopoulou, data management  
10 coordinator<sup>3</sup>, Chi Udeh-Momoh, research programme manager<sup>3</sup>, Sara Ahmadi-Abhari,  
11 lecturer in epidemiology of ageing<sup>3</sup>, Azeem Majeed, chair: primary care and public health<sup>2,4</sup>,  
12 Lefkos T. Middleton, chair: neurology, neuroepidemiology and ageing<sup>3,4</sup>, Alison. H.  
13 McGregor, professor of musculoskeletal biodynamics<sup>1</sup>  
14

15  
16 \*contributed equally as joint lead authors

17 **Author affiliations:**

18  
19 <sup>1</sup>MSk lab, Faculty of Medicine, Imperial College London, UK, W12 0BZ

20  
21 <sup>2</sup>Department of Primary Care and Public Health, Imperial College London, UK, W6 8RP

22  
23 <sup>3</sup>Ageing Epidemiology Research Unit (AGE), School of Public Health, Faculty of Medicine,  
24 Imperial College London, UK

25  
26 <sup>4</sup>Public Health Directorate, Imperial College NHS Healthcare Trust, London, UK

27  
28  
29  
30 **@Correspondence to:**

31 **David Salman**

32  
33 ORCID ID: 0000-0002-1481-8829

34  
35 MSk lab, 2nd Floor, Sir Michael Uren Hub, 86 Wood Lane, London, W12 0BZ

36  
37 Email: [d.salman11@imperial.ac.uk](mailto:d.salman11@imperial.ac.uk)

38  
39 Phone: +44 (0) 20 7594 2703

40 **Thomas Beaney**

41  
42 ORCID ID: 0000-0001-9709-7264

43  
44 Department of Primary Care and Public Health

45  
46 Charing Cross Campus, The Reynolds Building, St Dunstan's Road, London, W6 8RP

47  
48 Email: [thomas.beaney@imperial.ac.uk](mailto:thomas.beaney@imperial.ac.uk)

49  
50 Phone: +44 (0) 207 5943 368

51  
52  
53 Word count: 3683

54  
55 Figures:3

56  
57 Tables:2

### **Contributorship and the guarantor**

DS, TB and CR conceived the paper, developed the survey materials, carried out the analysis, wrote the paper equally as joint lead authors and are the guarantors. All authors developed the survey, carried out analysis and contributed to the development and editing of the paper.

### **Transparency declaration**

The lead authors confirm that the submitted manuscript is an honest, accurate and transparent account of the study being reported. No important aspects of the study have been omitted.

### **Ethics approval**

This research was approved by the Imperial College Research and Ethics Committee (ICREC) and Joint Research Compliance Office (22/04/2020; 201C5942). All participants were required to provide informed consent before taking part in the study. Data collected as a part of this study are anonymized and kept strictly confidential in accordance with the UK General Data Protection Regulations (2016).

### **Data sharing**

This is an ongoing study, but anonymised data can be provided upon request for the purposes of further data analysis, and can be requested from the Data Management Co-ordinator, Parthenia Giannakopoulou: [parthenia.giannakopoulou13@imperial.ac.uk](mailto:parthenia.giannakopoulou13@imperial.ac.uk)

### **Dissemination declaration**

Participants in the CHARIOT cohort are informed by regular newsletter of all publications pertaining to the cohort.

### **Acknowledgements**

Work towards this article was in part supported by the National Institute for Health Research (NIHR) Applied Research Collaboration Northwest London and Imperial Biomedical Research Centre (BRC). DS and TB are supported by NIHR academic clinical fellowships. The views expressed in this publication are those of the authors and not necessarily those of the National Institute for Health Research or the Department of Health and Social Care. Imperial College London is the sponsor for the CCRR study, and has no influence on the direction or content of the work. There was no external financial funding for the study.

We are grateful to Lesley Williamson, Monica Munoz-Troncoso, Snehal Pandya and Emily Pickering (CHARIOT register and facilitator team); Mariam Jiwani, Rachel Veeravalli, Islam Saiful, Danielle Rose, Susie Gold, Rachel Nejade and Shehla Shamsuddin (Imperial College London student volunteers); Stefan McGinn-Summers, Neil Beckford, Inthushaa Indrakumar

1  
2  
3 and Kristina Lakey (Departmental administrative staff in AGE); Dinithi Perera (departmental  
4 manager); Heather McLellan-Young (project manager); Helen Ward, James McKeand,  
5 Geraint Price, Josip Car, Christina Atchison, Nicholas Peters, Aldo Faisal, and Jennifer Quint  
6 (investigator team contributing to CCRR survey design, development and improvement).  
7  
8  
9

### 10 **How patients were involved in the creation of this article**

11  
12 Older adult volunteers (60-80 years of age) from various social and cultural backgrounds  
13 provided feedback on the survey content. This feedback was incorporated into the survey  
14 design.  
15  
16

### 17 **Conflicts of Interest**

18  
19 All authors have completed the ICMJE uniform disclosure form at  
20 [www.icmje.org/coi\\_disclosure.pdf](http://www.icmje.org/coi_disclosure.pdf) and declare: no support from any organisation for the  
21 submitted work; Lefkos T. Middleton reports research funding from Janssen, Novartis, Merck  
22 and Takeda, outside the submitted work.  
23  
24  
25  
26

### 27 **Licence**

28  
29 The Corresponding Author has the right to grant on behalf of all authors and does grant on  
30 behalf of all authors, [a worldwide licence](#) to the Publishers and its licensees in perpetuity, in  
31 all forms, formats and media (whether known now or created in the future), to i) publish,  
32 reproduce, distribute, display and store the Contribution, ii) translate the Contribution into  
33 other languages, create adaptations, reprints, include within collections and create  
34 summaries, extracts and/or, abstracts of the Contribution, iii) create any other derivative  
35 work(s) based on the Contribution, iv) to exploit all subsidiary rights in the Contribution, v)  
36 the inclusion of electronic links from the Contribution to third party material where-ever it may  
37 be located; and, vi) licence any third party to do any or all of the above.  
38  
39  
40  
41  
42  
43  
44  
45  
46  
47  
48  
49  
50  
51  
52  
53  
54  
55  
56  
57  
58  
59  
60

## Abstract

**Objectives:** Physical inactivity is more common in older adults, is associated with social isolation and loneliness, and contributes to increased morbidity and mortality. We examined the effect of social restrictions, implemented to reduce transmission of COVID-19 in the UK (lockdown), on physical activity (PA) levels of older adults, and the demographic, lifestyle and social predictors of this change.

**Design:** Baseline analysis of a survey-based prospective cohort study

**Setting:** Adults enrolled in the Cognitive Health in Ageing Register for Investigational and Observational Trials (CHARIOT) cohort from GP practices in North West London were invited to participate from April to July 2020.

**Participants:** 6,219 cognitively healthy adults aged 50 to 92 years completed the survey.

**Main outcome measures:** Self-reported PA before and after lockdown, as measured by Metabolic Equivalent of Task (MET) minutes. Associations of PA with demographic, lifestyle and social factors, mood and frailty.

**Results:** Mean PA was significantly lower following lockdown, from 3,519 MET minutes/week to 3,185 MET minutes/week ( $p < 0.001$ ). After adjustment for confounders and pre-lockdown PA, lower levels of PA after lockdown were found in those who were over 85 years old (640 [95% CI: 246 to 1034] MET minutes/week less); were divorced or single (240 [95% CI: 120 to 360] MET minutes/week less); living alone (277 [95% CI: 152 to 402] MET minutes/week less); reported feeling lonely often (306 [95% CI: 60 to 552] MET minutes/week less); and showed symptoms of depression (1007 [95% CI: 1401 to 612] MET minutes/week less) compared to those aged 50-64 years, married, co-habiting, and not reporting loneliness or depression, respectively.

**Conclusions and Implications:** Markers of social isolation, loneliness and depression were associated with lower PA following lockdown in the UK. Targeted interventions to increase PA in older adults who identify as socially isolated, lonely or depressed should be considered.

### Limitations:

- Survey responders identified predominantly as White/Caucasian background, which may limit the generalisability of the findings to other population groups
- Survey responders showed higher levels of physical activity than the general population

### Strengths:

- Survey responses were obtained from over 6000 older adults
- Multivariable analyses were adjusted for confounders according to pre-determined causal pathways

For peer review only



## 1.0 Background and Rationale

Physical inactivity (PA) adversely affects older adults, with 60-70% of those aged over 75 years not sufficiently active for good health<sup>1,2</sup> as defined by meeting World Health Organization (WHO)<sup>3</sup> and UK<sup>4</sup> guidelines. From March until June 2020 in the UK, a national 'lockdown' was implemented to reduce exposure to, and transmission of, COVID-19. Although applied to the whole population, adults aged over 70 years and those with underlying health conditions at higher risk of severe COVID-19 disease were asked to follow more stringent social distancing measures. These included remaining at home where possible; avoiding social mixing in the community; avoiding physically interacting with friends and family; and avoiding public transport.<sup>5</sup>

Social isolation and loneliness in older adults, possibly exacerbated during lockdowns,<sup>6</sup> is associated with increases in morbidity and mortality, and also with increases in physical inactivity and sedentary time, as shown from subjective self-reporting and from accelerometer data.<sup>7,8</sup> Physical inactivity may therefore have a role in mediating the increased morbidity and mortality associated with social isolation.<sup>9</sup> We set up the CHARIOT COVID-19 Rapid Response study (CCRR) in April 2020 to monitor symptoms and the impact of the COVID-19 pandemic on various health and lifestyle factors, by repeat questionnaire survey of the Cognitive Health in Ageing Register for Investigational and Observational Trials (CHARIOT) members.

We hypothesised that imposed social restrictions would negatively impact on PA levels of older adults, and that change in PA after lockdown would be modified by certain demographic, lifestyle and social factors, with a focus on markers of social isolation and perceived loneliness. An awareness of the extent of, and predictors for, change in PA levels will aid our understanding of the impact of social isolation on the health of older adults, both with respect to pandemic-related lockdowns and social isolation itself.

## 2.0 Methods

### 2.1 CCRR survey

Study participants were recruited from the CHARIOT register, a cohort of over 40,000 cognitively healthy adult volunteers aged over 50 years, recruited from 172 GP surgeries across West and North London as part of a collaboration between regional GP practices and the School of Public Health, at Imperial College London.

1  
2  
3 This ongoing prospective cohort study was initiated in April 2020 with repeated questionnaire  
4 surveys conducted every six weeks. The CCRR baseline survey consists of questions related  
5 to basic demographics, diet, alcohol and smoking status, symptoms of COVID-19, functional  
6 activities, physical activity, sleep, frailty and mental health (supplementary file 1). For physical  
7 activity, the International Physical Activity Questionnaire (IPAQ) short-form was used,<sup>10</sup> asking  
8 respondents to document their weekly vigorous and moderate activity, walking and sitting time  
9 from the week prior to completing the survey; and for the week prior to implementation of  
10 social restriction measures. For assessing frailty, the 5-point FRAIL scale,<sup>11,12</sup> and for  
11 assessing mental health symptoms, the Hospital Anxiety and Depression (HADS) scale,<sup>13</sup>  
12 were used. A question on loneliness was used from the Imperial College Sleep Quality  
13 questionnaire; in turn adapted from the Pittsburgh Sleep Quality Index<sup>14</sup> and Centre for  
14 Epidemiologic Studies of Depression Scale<sup>15</sup>, for work-free periods.  
15  
16  
17  
18  
19  
20  
21  
22

23 The survey was sent to 15,000 CHARIOT participants via email, with a subsequent  
24 25,000 contacted by post. 7,320 participants responded and completed the survey. Of these  
25 respondents, 6,219 completed IPAQ data both before and after introduction of lockdown  
26 measures and were included in the final analysis. Data used in the present analysis were  
27 completed between 30<sup>th</sup> April and the 22<sup>nd</sup> July 2020.  
28  
29  
30  
31  
32

## 33 2.2 Statistical analysis

34 All analyses were conducted using Stata version 16.1 (StataCorp 2019) and R.<sup>16,17</sup>  
35 Body Mass Index (BMI) was calculated as weight in kilograms divided by the square of height  
36 in metres and categorised according to standard WHO criteria. IPAQ data were cleaned  
37 according to the IPAQ data cleaning protocol,<sup>18</sup> and the Metabolic Equivalent of Task (MET)  
38 minutes per week, calculated for each activity and total activity (supplementary file 2). Paired  
39 t-tests were used to compare the distributions of mean PA levels pre- and post-lockdown.  
40  
41  
42  
43  
44  
45

46 Measures of association with explanatory variables were explored in univariable linear  
47 regression models for two outcomes: i) overall weekly MET minutes after introduction of  
48 lockdown and ii) the difference in overall weekly MET minutes before versus after the  
49 introduction of lockdown. Multivariable models were constructed for the outcome of MET  
50 minutes after lockdown, adjusting *a priori* each explanatory variable in turn for age, sex and  
51 ethnicity. Month of survey completion was also included in the model to account for seasonal  
52 changes, and the finding that physical activity after lockdown varied by month (supplementary  
53 file 2: figure 2). Weekly MET minutes before lockdown was also included in the model given  
54 its strong association with activity levels after lockdown, which remained significantly  
55 associated in all models. Denominators for each model vary according to the levels of  
56  
57  
58  
59  
60

1  
2  
3 missingness in variables included in the models, which was low for most variables, except for  
4 BMI (unrecorded in 51.4% of participants).  
5

6  
7 A causal diagram was constructed using DAGitty<sup>19</sup> (supplementary file 2: figure 4) to aid  
8 adjustment for confounders in order to separate the overall causal effects of marital status,  
9 loneliness and living alone on physical activity. Additional multivariable models were then  
10 constructed based on the causal diagram for loneliness, adjusting for age, sex, ethnicity,  
11 household status, marital status, shielding status and frailty category. No further adjustment  
12 was necessary for marital status or household status. Residuals were plotted against fitted  
13 values to assess for outlying points and heteroskedasticity; and plots of Cook's distance and  
14 leverage against fitted values were examined to detect the presence of influential points.  
15  
16  
17  
18  
19

### 20 **3.0 Results**

#### 21 **3.1 Participant characteristics**

22  
23  
24 Of the 6,219 participants included in the present study, 55.4% were female, and the  
25 majority (55.3%) were aged 65-74 years with a mean age of 70 years. 93.7% of respondents  
26 classified themselves as being of white ethnic background, with 2.8% of Asian ethnic  
27 background, and only 0.7% of black African or Caribbean background. Approximately half of  
28 participants (48.6%) had a recorded height and weight, with a mean BMI of 25.3 kg/m<sup>2</sup>. The  
29 majority of respondents were married (62.2%), co-habiting (72.8%) and retired (69.5%). Most  
30 respondents did not smoke (96.9%), drank alcohol (82.6%) and felt they ate a healthy diet  
31 (80.3%). 18.0% of respondents were classified as pre-frail, with 0.5% as frail and 26.2%  
32 reported that they were shielding at the time of the survey (table 1).  
33  
34  
35  
36  
37  
38

#### 39 **3.2 Physical activity before and after social distancing measures**

40  
41 Mean (SD) PA for participants prior to lockdown was 3,519 (2867) MET minutes/week.  
42 There was a significant reduction in mean MET minutes following implementation of lockdown  
43 to 3,186 (2673) MET minutes/week ( $p < 0.001$ ; table 2 & figure 1). 3,167 (50.9%) participants  
44 decreased their activity during lockdown by a mean (SD) of 1,957 (2025) MET minutes/week,  
45 534 (8.6%) maintained the same level of activity, and 2,518 (40.5%) increased activity by a  
46 mean (SD) of 1,636 (1775) MET minutes/week. Mean sitting time increased by 276 MET  
47 minutes/week after lockdown (2,680) compared to before (2,404) (table 2).  
48  
49  
50  
51  
52

53 5,762 (92.7%) participants achieved at least the minimum guidance of 600 MET minutes/week  
54 of activity, as defined by WHO,<sup>3</sup> prior to implementation of lockdown measures, slightly  
55 reducing to 5,672 (91.2%) following their introduction ( $p < 0.001$ ). 5,039 (81.0%) achieved  
56 1,200 MET minutes/week before lockdown, with 4,904 (78.9%) achieving this after lockdown  
57 ( $p < 0.001$ ). Following lockdown, PA levels varied by month of survey completion, with the  
58  
59  
60

1  
2  
3 highest levels in June and lowest levels in July. There was no significant difference between  
4 self-reported PA before lockdown by month of survey completion (supplementary file 2: table  
5 1 & figures 2-3).  
6  
7

### 8 **3.3 Predictors of physical activity after lockdown, and change from before lockdown**

#### 9 **3.3.1 Demographic and lifestyle factors**

10  
11  
12  
13 Univariable linear regression models showed statistically significant associations with  
14 lower PA after lockdown in older age groups but no evidence of differences in the change from  
15 before lockdown between age groups ( $p < 0.001$  and  $p = 0.184$ , respectively; figures 1 & 2). After  
16 multivariable adjustment for sex, ethnicity, month of survey completion and pre-lockdown  
17 physical activity there was evidence of significantly lower levels of PA with increasing age,  
18 with adults aged 85 years and over doing on average 640 (95% CI: 246 to 1034) MET  
19 minutes/week less than those aged 50-64 years (figure 3). There was no significant difference  
20 in PA after lockdown in males and females ( $p = 0.180$ ), but females on average exhibited a  
21 greater decline in PA from before lockdown than males (450 vs 189 MET minutes/week less  
22 respectively;  $p < 0.001$ ; figures 1 & 2). After multivariable adjustment, including age, there was  
23 only a small and borderline significant difference in PA after lockdown between gender (PA in  
24 males on average 108 MET minutes/week more than females; 95% CI: -1 to 216; figure 3).  
25 No significant associations were seen between PA after lockdown or change in PA according  
26 to ethnicity or employment status, before or after adjustment.  
27  
28  
29  
30  
31  
32  
33  
34  
35

36 Lower levels of PA after lockdown were seen with increasing BMI category, in current smokers  
37 and in those reporting an unhealthy or worsening diet before and after adjustment (figure 1).  
38 After adjustment, a dose-response relationship was evident between lower PA and increasing  
39 BMI ( $p = 0.030$ ), with obese individuals doing 578 (95% CI: 324 to 832) MET minutes/week less  
40 than those of a healthy weight (figure 3). The denominator included in analyses of BMI was  
41 significantly lower than for other models, as BMI was unrecorded for 51.4% of participants.  
42 Current alcohol consumption was weakly associated with increased levels of PA in both  
43 univariable and multivariable models, with current drinkers reporting 145 MET minutes/week  
44 more than non-drinkers after adjustment (95% CI: 1 to 289; figures 2 & 3).  
45  
46  
47  
48  
49  
50

#### 51 **3.3.2 Associations with social isolation and loneliness**

52  
53 Participants who were divorced, single or widowed were, on average, less active after  
54 lockdown than those married or living with a partner (3,026 vs 3,262 MET minutes/week;  
55  $p = 0.001$ ); and exhibited a greater decline in PA from before lockdown (540 vs 236 MET  
56 minutes/week less;  $p < 0.001$ ; figures 1 & 2). The association with PA after lockdown remained  
57 after adjustment, with those divorced, single or widowed doing on average 240 (95% CI: 120  
58  
59  
60

1  
2  
3 to 360) MET minutes/week less (figure 3). Participants living alone were also less active than  
4 those co-habiting and showed greater reductions in PA from before lockdown. After  
5 adjustment for confounders and PA before lockdown, those living alone were doing 277 (95%  
6 CI: 152 to 402) MET minutes/week less than those co-habiting (figure 3).  
7  
8  
9

10 Significant associations were seen between PA after lockdown and frequency of loneliness,  
11 with those 'often' experiencing loneliness achieving 2,938 MET minutes/week compared with  
12 3,284 MET minutes/week in those 'never' experiencing loneliness ( $p=0.024$ ; figure 1). Greater  
13 declines in PA from before lockdown were also seen with increasing loneliness (figure 2). After  
14 adjustment, PA after lockdown was significantly lower for those with increased frequency of  
15 loneliness (figure 3). After full adjustment including, in addition, household status, shielding  
16 status and frailty category, those experiencing loneliness 'often' reported 306 (95% CI: 60 to  
17 552) MET minutes/week less activity than those 'never' lonely (supplementary file 2: table 4).  
18  
19  
20  
21  
22

23 Significantly lower physical activity levels were recorded in those shielding and in participants  
24 categorised as pre-frail or frail (both  $p<0.001$ ; figure 1). Larger declines in PA from before  
25 lockdown were seen in those shielding compared to those not shielding (588 vs 243 MET  
26 minutes/week less;  $p<0.001$ ), but there was no significant difference in change in PA  
27 according to frailty category ( $p=0.389$ ; figure 2). After adjustment, frail participants were doing  
28 926 (95% CI: 189 to 1,663) MET minutes less on average than those classed as robust (figure  
29 3). Participants who were shielding were doing an average of 290 (95% CI: 163 to 417) MET  
30 minutes/week less than those not shielding (figure 3).  
31  
32  
33  
34  
35

### 36 37 **3.3.3 Associations with depression and anxiety**

38  
39 Symptoms of depression were associated with lower levels of PA during lockdown,  
40 with those meeting the criteria for depression reporting 2,450 MET minutes/week compared  
41 to 3,195 MET minutes/week in those with normal scores ( $p<0.001$ ; figure 1). There was no  
42 strong association with anxiety scores. Mean change in PA from before lockdown was  
43 associated with both depression and, in contrast to absolute PA levels, with anxiety scores.  
44 Participants with depression reported 1,450 MET minutes/week less on average after  
45 lockdown compared with before, while those with normal scores reported 293 MET  
46 minutes/week less ( $p<0.001$ ). Similarly, in those with anxiety, PA reduced by 836 MET  
47 minutes/week compared to 312 MET minutes/week in those with normal scores ( $p=0.004$ ;  
48 figure 2).  
49  
50  
51  
52  
53  
54

55 After adjustment, those meeting the criteria for depression on the HADS scale had significantly  
56 lower PA levels than those with normal scores, doing on average 1,007 (95% CI: 1401 to 612)  
57 MET minutes/week less (figure 3). There remained no statistically significant association  
58 between anxiety score and physical activity after adjustment.  
59  
60



## 4.0 Discussion

### 4.1 Main findings

Data from the CCRR study show that participants experienced, on average, a significant decrease in PA after the introduction of lockdown in the UK when compared with before, together with an increase in sitting time. When adjusted for age, sex, ethnicity, month of survey completion and baseline physical activity, factors strongly associated with a reduction in PA include; increased age, increased BMI, frailty, current smoking, and a change to a less healthy diet. Factors associated with social isolation were also significantly associated with a reduction in PA: those divorced, single or widowed, living alone, shielding or reporting increased frequency of loneliness did significantly less PA after lockdown. Furthermore, a strong association was also seen with lower PA during lockdown in those with depression, but not for those with anxiety.

### 4.2 The effect of lockdown on physical activity

There was a reduction in PA in over half of our participants, and a decrease in mean levels of PA by 333 MET minutes/week following the introduction of lockdown measures in the UK. This was accompanied by an increase in sitting time by 276 minutes per week, an adverse finding given the adverse health impacts associated with increased sedentary and sitting time.<sup>20</sup> These findings correlate with other studies from the UK (a decrease in 25% of adults aged over 20 years following lockdown),<sup>21</sup> Spain<sup>22</sup> and China,<sup>23</sup> and from a global survey collected in 8 different languages,<sup>24</sup> despite the differences in outdoor exercise permissions between countries. Reductions in PA may impact disproportionately across society. We found that increasing age associated with a reduction in PA after lockdown, corresponding with that seen in Japan, with a 26.5% (65 minutes) decrease in total physical activity in adults aged 65 to 84.<sup>25</sup> The UK Active Lives Survey found a 7.3% reduction in the proportion of active adults aged 55-74 years, from 63% to 56%, during the pandemic, and a 6.6% reduction in those aged 75 years and above, from 42% to 35%.<sup>26</sup> A self-reported study in the UK found that those with a diagnosis of obesity, hypertension, lung disease, depression or a disability were more likely to reduce PA during lockdown.<sup>21</sup>

### 4.3 Social relationships, loneliness, and physical activity

Individuals for whom social engagement was more likely to be restricted, such as those who were shielding, divorced, single, widowed, or living alone, were more likely to have lower levels of PA after lockdown, and to have declined to a greater extent. Similarly, those who subjectively reported feeling lonely were more likely to have lower PA levels, and

1  
2  
3 greater declines from before lockdown. These associations remained significant after  
4 multivariable adjustment.  
5

6  
7 Associations between health behaviours, including PA, and social relationships have been  
8 noted previously. Data from the English Longitudinal Study of Ageing (ELSA) showed that  
9 socially isolated respondents were less likely to report healthy diets, and more likely to  
10 smoke.<sup>7</sup> Crucially, they showed reduced activity counts in socially isolated individuals  
11 (measured by accelerometer) in a sample of adults older than 50 years,<sup>8</sup> and reduced self-  
12 reported moderate to vigorous physical activity.<sup>7</sup> This is particularly important given that  
13 isolated and lonely individuals are at an increased risk of morbidity and mortality from  
14 cardiovascular events, with the majority of this association mediated by risk factors which  
15 include physical inactivity.<sup>27</sup> Fixed effect models from the ELSA cohort show that social  
16 disengagement, domestic isolation and loneliness are associated with measures of poorer  
17 physical performance, and although they appear to be independent of physical activity, may  
18 still be associated along the causal pathway.<sup>28</sup> Studies of spousal pairs found that both men  
19 and women in married couples had greater levels of PA than their single counterparts,<sup>29</sup> and  
20 changes in PA are positively associated with changes in the PA of a spouse.<sup>30</sup> Increasing PA  
21 is associated with larger,<sup>31,32</sup> more diverse<sup>33</sup> and more heterogenous (in terms of PA) social  
22 networks, and having more physically active people in a social network is associated with  
23 being more active.<sup>34</sup>  
24  
25  
26  
27  
28  
29  
30  
31  
32  
33

34 The interaction between social relationships and PA levels may be bi-directional. Levels of  
35 PA are influenced by multiple factors at different levels, including individual (psychological,  
36 genetic); interpersonal (social networks); environmental (social, built, natural); and regional  
37 or global determinants.<sup>35</sup> Social networks might influence PA through social support for  
38 individuals to take up and maintain activity, but also by regulating social norms, and  
39 associating PA with social connections or attachments.<sup>36</sup> There may also be increased  
40 opportunities for PA<sup>34</sup> when social networks are present.  
41  
42  
43  
44  
45

#### 46 **4.4 Mood, health behaviours and physical activity**

  
47

48 In those reporting symptoms of depression, there were significantly lower levels of  
49 PA and a significant decrease in activity when compared to before lockdown. These findings  
50 correlate with those from the UK,<sup>37</sup> Australia,<sup>38</sup> and Spain,<sup>39</sup> which found inverse  
51 associations between physical activity levels and poor mental health. Similarly, a cross  
52 sectional study of Brazilian adults who were self-isolating found lower odds of symptoms of  
53 anxiety or depression in those who were performing over 30 or 15 minutes per day of  
54 moderate or vigorous activity respectively, and higher odds in those with prolonged  
55 sedentary time over 10 hours.<sup>40</sup> The associations between PA and mental health are well  
56  
57  
58  
59  
60

1  
2  
3 known, with positive impacts on wellbeing,<sup>41</sup> and reduced incidence and severity of  
4 symptoms of mental ill-health.<sup>42–44</sup> Therefore, these findings are unsurprising, although the  
5 interaction between PA and reduced markers of mental ill-health in older adults may be bi-  
6 directional. Moreover, social isolation and loneliness may mediate some of this effect:  
7  
8 previous data from the CCRR cohort showed an interaction between social isolation,  
9 loneliness, and female gender with worsening depression and anxiety over lockdown.<sup>45</sup> We  
10 found no statistically significant difference in PA during lockdown with anxiety symptoms, at  
11 odds with previous studies.<sup>37</sup> However, the trajectory of anxiety symptoms is not known, and  
12 it is not clear whether anxiety symptoms pre-dated the introduction of lockdown.  
13  
14  
15  
16  
17

#### 18 **4.5 Health behaviours and physical activity**

19  
20 A decrease in PA was associated with other detrimental health behaviours, including  
21 unhealthy diet and smoking. A similar tendency of clustering of unhealthy behaviours during  
22 the COVID-19 pandemic was noted in a cohort of patients in Spain with type 2 diabetes  
23 mellitus, who showed an increase in sugary foods and snack consumption alongside an  
24 increase in sitting time, and a decrease in time spent walking or doing moderate physical  
25 activity during lockdown when compared to beforehand.<sup>46</sup> That detrimental health  
26 behaviours might coincide in response to lockdown shows the importance of targeted  
27 interventions for certain groups. Interestingly, alcohol consumption was seen to be a  
28 protective factor in our cohort, and this does not tie with other findings on the negative  
29 associations with increased alcohol use during the COVID-19 pandemic.<sup>47</sup> This may be due  
30 to the specific demographic features of our cohort, but the possibility of alcohol consumption  
31 being associated with social interaction in this group cannot be excluded.  
32  
33  
34  
35  
36  
37  
38  
39

#### 40 **4.6 Limitations**

41  
42 This study has several limitations which may impact the generalisability of our  
43 findings. First, the CCRR cohort appear more physically active than the general population.  
44 90% of participants in CCRR achieved minimum UK<sup>4</sup> and WHO<sup>3</sup> guidance, both before and  
45 following lockdown. Over 78% achieved double this amount, and mean levels of PA were at  
46 least five times greater than the minimum recommendation. In contrast, only 61% of UK  
47 adults aged 55-74 years achieve minimum recommended levels.<sup>2</sup> Despite this, CCRR  
48 participants may still not be active enough for major health gains. A 2016 systematic review  
49 and meta-analysis suggested that optimal risk reduction for breast and colorectal cancer,  
50 diabetes, ischaemic heart disease and stroke events were obtained from physical activity at  
51 3000-4000 MET minutes per week.<sup>48</sup>  
52  
53  
54  
55  
56  
57

58  
59 Second, there are differences in demography between the CCRR cohort and the general  
60 population of the UK, which may explain the higher levels of PA we observed. 93% of CCRR



respondents identify as white/Caucasian ethnicity. The Active Lives Survey demonstrated a difference in those achieving minimum activity levels in White British individuals (65%) and those from Black (58%) and Asian (54%) ethnicities.<sup>2</sup> Third, the CCRR survey relies on self-report, using the short form IPAQ. IPAQ data is well validated across diverse participants up to the age of 65 years<sup>10</sup> and a study of the performance of the IPAQ in older Japanese adults demonstrated adequate validity.<sup>49</sup> However, results from self-reporting tools for PA only weakly correlate with those from objective measures, such as accelerometers and pedometers.<sup>50–53</sup> Finally, recall bias and seasonal changes in physical activity may also have impacted on the results. The CCRR survey was collected in April–July 2020, with participants asked to recall PA levels in the week before lockdown, which over time may become less reliable. However, no significant differences were found in the mean PA levels reported before lockdown according to month of survey completion and although there were apparent differences in PA during lockdown by month, we were able to adjust for this in multivariable models. The CCRR prospective cohort study is ongoing, with follow-up questionnaires sent to participants at regular intervals. When complete this will allow for long-term impacts to be measured, accounting for seasonal variation.

#### 4.7 Conclusions

Findings from our CCRR study suggest a significant decline in average physical activity levels in older adults following the introduction of lockdown measures during the COVID-19 pandemic. Lower activity levels after lockdown were strongly linked to older age, and to those with objective markers of social isolation, subjective feelings of loneliness and symptoms of depression. Strategies and targeted interventions to increase and sustain PA levels in older adults are needed to mitigate the adverse health impacts not only of COVID-19 related lockdowns, but of social isolation in general, and should consider social relationships in their design and implementation.

#### 5.0 Summary boxes

##### What is already known on this topic

- Physical inactivity adversely affects older adults: almost two-thirds of adults over 75 years old are not sufficiently physically active for good health
- Social isolation and loneliness are associated with increased morbidity and mortality, and decreased physical activity; lockdowns for Covid-19, although crucial, may exacerbate this

##### What this study adds

-Physical activity decreased in older adults following implementation of lockdown measures in the UK

-Those with factors suggesting increased social isolation, loneliness and depression were particularly susceptible to lower levels of physical activity after lockdown

-Interventions designed to increase physical activity in older adults should take account of social relationships in their design and implementation, and there is a case for specific resources to help protect socially isolated individuals during pandemic-related lockdowns

## 6.0 References

- 1 NHS Digital. Health Survey for England 2016 Physical activity in adults. 2017 <https://files.digital.nhs.uk/publication/m/3/hse16-adult-phy-act.pdf>.
- 2 Sport England. Active Lives Adult Survey November 2018/19 Report. 2020 [https://sportengland-production-files.s3.eu-west-2.amazonaws.com/s3fs-public/2020-04/Active Lives Adult November 18-19 Report..pdf?BhkAy2K28pd9bDEz\\_NuisHI2ppuqJtpZ](https://sportengland-production-files.s3.eu-west-2.amazonaws.com/s3fs-public/2020-04/Active Lives Adult November 18-19 Report..pdf?BhkAy2K28pd9bDEz_NuisHI2ppuqJtpZ).
- 3 World Health Organization. Global Recommendations on Physical Activity for Health. 2010 <https://www.who.int/publications/i/item/9789241599979>.
- 4 Davies SC, Atherton F, McBride M, Calderwood C. UK Chief Medical Officers' Physical Activity Guidelines. 2019.
- 5 Gov.uk. UK Government COVID-19 guidance. .
- 6 Wu B. Social isolation and loneliness among older adults in the context of COVID-19: a global challenge. *Glob Heal Res Policy* 2020; **5**: 27.
- 7 Kobayashi LC, Steptoe A. Social Isolation, Loneliness, and Health Behaviors at Older Ages: Longitudinal Cohort Study. *Ann Behav Med* 2018; **52**: 582–93.
- 8 Schrempft S, Jackowska M, Hamer M, Steptoe A. Associations between social isolation, loneliness, and objective physical activity in older men and women. *BMC Public Health* 2019; **19**: 74.
- 9 Elovainio M, Hakulinen C, Pulkki-Råback L, *et al*. Contribution of risk factors to excess mortality in isolated and lonely individuals: an analysis of data from the UK Biobank cohort study. *Lancet Public Heal* 2017. DOI:10.1016/S2468-2667(17)30075-0.
- 10 Craig CL, Marshall AL, Sjöström M, *et al*. International physical activity questionnaire: 12-country reliability and validity. *Med Sci Sports Exerc* 2003; **35**: 1381–95.
- 11 Gleason LJ, Benton EA, Alvarez-Nebreda ML, Weaver MJ, Harris MB, Javedan H. FRAIL Questionnaire Screening Tool and Short-Term Outcomes in Geriatric Fracture Patients. *J Am Med Dir Assoc* 2017. DOI:10.1016/j.jamda.2017.07.005.
- 12 Woo J, Yu R, Wong M, Yeung F, Wong M, Lum C. Frailty screening in the community using the FRAIL scale. *J Am Med Dir Assoc* 2015. DOI:10.1016/j.jamda.2015.01.087.
- 13 Zigmond AS, Snaith RP. The Hospital Anxiety and Depression Scale. *Acta Psychiatr Scand* 1983. DOI:10.1111/j.1600-0447.1983.tb09716.x.

- 1  
2  
3 14 Buysse DJ, Reynolds CF, Monk TH, Berman SR, Kupfer DJ. The Pittsburgh sleep  
4 quality index: A new instrument for psychiatric practice and research. *Psychiatry Res*  
5 1989. DOI:10.1016/0165-1781(89)90047-4.  
6  
7 15 Radloff LS. The CES-D Scale: A Self-Report Depression Scale for Research in the  
8 General Population. *Appl Psychol Meas* 1977. DOI:10.1177/014662167700100306.  
9  
10 16 R Core Team. R: A language and environment for statistical computing. R Found.  
11 Stat. Comput. 2019.  
12  
13 17 Viechtbauer W. Conducting meta-analyses in R with the metafor. *J Stat Softw* 2010;  
14 **36**: 1–48.  
15  
16 18 IPAQ scoring protocol - International Physical Activity Questionnaire.  
17 <https://sites.google.com/site/theipaq/scoring-protocol> (accessed Dec 1, 2020).  
18  
19 19 Textor J, van der Zander B, Gilthorpe MS, Liškiewicz M, Ellison GT. Robust causal  
20 inference using directed acyclic graphs: The R package ‘dagitty’. *Int J Epidemiol*  
21 2016. DOI:10.1093/ije/dyw341.  
22  
23 20 Ekelund U, Tarp J, Steene-Johannessen J, *et al.* Dose-response associations  
24 between accelerometry measured physical activity and sedentary time and all cause  
25 mortality: Systematic review and harmonised meta-analysis. *BMJ* 2019.  
26 DOI:10.1136/bmj.l4570.  
27  
28 21 Rogers NT, Waterlow NR, Brindle H, *et al.* Behavioral Change Towards Reduced  
29 Intensity Physical Activity Is Disproportionately Prevalent Among Adults With Serious  
30 Health Issues or Self-Perception of High Risk During the UK COVID-19 Lockdown .  
31 *Front. Public Heal.* . 2020; **8**: 526.  
32  
33 22 Castañeda-Babarro A, Arbillaga-Etxarri A, Gutiérrez-Santamaría B, Coca A. Physical  
34 Activity Change during COVID-19 Confinement. *Int J Environ Res Public Health* 2020;  
35 **17**: 1–10.  
36  
37 23 Wang X, Lei SM, Le S, *et al.* Bidirectional Influence of the COVID-19 Pandemic  
38 Lockdowns on Health Behaviors and Quality of Life among Chinese Adults.  
39 DOI:10.3390/ijerph17155575.  
40  
41 24 Ammar A, Brach M, Trabelsi K, *et al.* Effects of COVID-19 Home Confinement on  
42 Eating Behaviour and Physical Activity: Results of the ECLB-COVID19 International  
43 Online Survey. *Nutrients* 2020; **12**. DOI:<https://dx.doi.org/10.3390/nu12061583>.  
44  
45 25 Yamada M, Kimura Y, Ishiyama D, *et al.* Effect of the COVID-19 Epidemic on Physical  
46 Activity in Community-Dwelling Older Adults in Japan: A Cross-Sectional Online  
47 Survey. *J Nutr Health Aging* 2020; : 1–3.  
48  
49 26 Active Lives Adult Survey Coronavirus (Covid-19) Report. 2020 [https://sportengland-](https://sportengland-production-files.s3.eu-west-2.amazonaws.com/s3fs-public/2020-10/Active Lives Adult May 19-20 Coronavirus Report.pdf?2L6TBVV5UvCGXb_VxZcWHcfFX0_wRaI7)  
50 [production-files.s3.eu-west-2.amazonaws.com/s3fs-public/2020-10/Active Lives Adult](https://sportengland-production-files.s3.eu-west-2.amazonaws.com/s3fs-public/2020-10/Active Lives Adult May 19-20 Coronavirus Report.pdf?2L6TBVV5UvCGXb_VxZcWHcfFX0_wRaI7)  
51 [May 19-20 Coronavirus Report.pdf?2L6TBVV5UvCGXb\\_VxZcWHcfFX0\\_wRaI7](https://sportengland-production-files.s3.eu-west-2.amazonaws.com/s3fs-public/2020-10/Active Lives Adult May 19-20 Coronavirus Report.pdf?2L6TBVV5UvCGXb_VxZcWHcfFX0_wRaI7)  
52 (accessed Feb 8, 2021).  
53  
54 27 Hakulinen C, Pulkki-Råback L, Virtanen M, Jokela M, Kivimäki M, Elovainio M. Social  
55 isolation and loneliness as risk factors for myocardial infarction, stroke and mortality:  
56 UK Biobank cohort study of 479 054 men and women. *Heart* 2018.  
57 DOI:10.1136/heartjnl-2017-312663.  
58  
59 28 Philip KEJ, Polkey MI, Hopkinson NS, Steptoe A, Fancourt D. Social isolation,  
60 loneliness and physical performance in older-adults: fixed effects analyses of a cohort  
study. *Sci Rep* 2020; **10**: 13908.

- 1  
2  
3 29 Pettee KK, Brach JS, Kriska AM, *et al.* Influence of marital status on physical activity  
4 levels among older adults. *Med Sci Sports Exerc* 2006; **38**: 541–6.  
5  
6 30 Cobb LK, Godino JG, Selvin E, Kucharska-Newton A, Coresh J, Koton S. Spousal  
7 influence on physical activity in middle-aged and older adults. *Am J Epidemiol* 2016;  
8 **183**: 444–51.  
9  
10 31 Marquez B, Elder JP, Arredondo EM, Madanat H, Ji M, Ayala GX. Social network  
11 characteristics associated with health promoting behaviors among Latinos. *Heal*  
12 *Psychol* 2014; **33**: 544–53.  
13  
14 32 Tamers SL, Okechukwu C, Allen J, *et al.* Are social relationships a healthy influence  
15 on obesogenic behaviors among racially/ethnically diverse and socio-economically  
16 disadvantaged residents? *Prev Med (Baltim)* 2013; **56**: 70–4.  
17  
18 33 Legh-Jones H, Moore S. Network social capital, social participation, and physical  
19 inactivity in an urban adult population. *Soc Sci Med* 2012; **74**: 1362–7.  
20  
21 34 Mötteli S, Dohle S. Egocentric social network correlates of physical activity. *J Sport*  
22 *Heal Sci* 2020; **9**: 339–44.  
23  
24 35 Bauman AE, Reis RS, Sallis JF, *et al.* Correlates of physical activity: Why are some  
25 people physically active and others not? *Lancet*. 2012. DOI:10.1016/S0140-  
26 6736(12)60735-1.  
27  
28 36 McNeill LH, Kreuter MW, Subramanian S V. Social Environment and Physical activity:  
29 A review of concepts and evidence. *Soc Sci Med* 2006; **63**: 1011–22.  
30  
31 37 Jacob L, Tully MA, Barnett Y, *et al.* The relationship between physical activity and  
32 mental health in a sample of the UK public: A cross-sectional study during the  
33 implementation of COVID-19 social distancing measures. *Ment Health Phys Act* 2020;  
34 **19**: 100345.  
35  
36 38 Stanton R, To QG, Khaledi S, *et al.* Depression, Anxiety and Stress during COVID-19:  
37 Associations with Changes in Physical Activity, Sleep, Tobacco and Alcohol Use in  
38 Australian Adults. *Int J Environ Res Public Health* 2020; **17**: 4065.  
39  
40 39 López-Bueno R, Calatayud J, Ezzatvar Y, *et al.* Association Between Current Physical  
41 Activity and Current Perceived Anxiety and Mood in the Initial Phase of COVID-19  
42 Confinement . *Front. Psychiatry* . 2020; **11**: 729.  
43  
44 40 Schuch FB, Bulzing RA, Meyer J, *et al.* Associations of moderate to vigorous physical  
45 activity and sedentary behavior with depressive and anxiety symptoms in self-isolating  
46 people during the COVID-19 pandemic: A cross-sectional survey in Brazil. *Psychiatry*  
47 *Res* 2020; **292**: 113339.  
48  
49 41 Penedo FJ, Dahn JR. Exercise and well-being: A review of mental and physical health  
50 benefits associated with physical activity. *Curr. Opin. Psychiatry*. 2005.  
51 DOI:10.1097/00001504-200503000-00013.  
52  
53 42 Chekroud SR, Gueorguieva R, Zheutlin AB, *et al.* Association between physical  
54 exercise and mental health in 1·2 million individuals in the USA between 2011 and  
55 2015: a cross-sectional study. *The Lancet Psychiatry* 2018. DOI:10.1016/S2215-  
56 0366(18)30227-X.  
57  
58 43 McDowell CP, Dishman RK, Gordon BR, Herring MP. Physical Activity and Anxiety: A  
59 Systematic Review and Meta-analysis of Prospective Cohort Studies. *Am. J. Prev.*  
60 *Med.* 2019; **57**: 545–56.  
44 Schuch FB, Vancampfort D, Firth J, *et al.* Physical activity and incident depression: A

- 1  
2  
3 meta-analysis of prospective cohort studies. *Am J Psychiatry* 2018.  
4 DOI:10.1176/appi.ajp.2018.17111194.  
5
- 6 45 Robb CE, de Jager CA, Ahmadi-Abhari S, *et al.* Associations of Social Isolation with  
7 Anxiety and Depression During the Early COVID-19 Pandemic: A Survey of Older  
8 Adults in London, UK. *Front Psychiatry* 2020. DOI:10.3389/fpsy.2020.591120.  
9
- 10 46 Ruiz-Roso MB, Knott-Torcal C, Matilla-Escalante DC, *et al.* COVID-19 Lockdown and  
11 Changes of the Dietary Pattern and Physical Activity Habits in a Cohort of Patients  
12 with Type 2 Diabetes Mellitus. *Nutrients* 2020; **12**. DOI:10.3390/nu12082327.  
13
- 14 47 Sallie SN, Ritou V, Bowden-Jones H, Voon V. Assessing international alcohol  
15 consumption patterns during isolation from the COVID-19 pandemic using an online  
16 survey: highlighting negative emotionality mechanisms. *BMJ Open* 2020; **10**:  
17 e044276.  
18
- 19 48 Kyu HH, Bachman VF, Alexander LT, *et al.* Physical activity and risk of breast cancer,  
20 colon cancer, diabetes, ischemic heart disease, and ischemic stroke events:  
21 systematic review and dose-response meta-analysis for the Global Burden of Disease  
22 Study 2013. *BMJ* 2016; **354**: i3857.  
23
- 24 49 Tomioka K, Iwamoto J, Saeki K, Okamoto N. Reliability and validity of the  
25 international physical activity questionnaire (IPAQ) in elderly adults: The Fujiwara-kyo  
26 study. *J Epidemiol* 2011. DOI:10.2188/jea.JE20110003.  
27
- 28 50 Prince SA, Adamo KB, Hamel ME, Hardt J, Connor Gorber S, Tremblay M. A  
29 comparison of direct versus self-report measures for assessing physical activity in  
30 adults: a systematic review. *Int J Behav Nutr Phys Act* 2008; **5**: 56.  
31
- 32 51 Lee PH, Macfarlane DJ, Lam TH, Stewart SM. Validity of the international physical  
33 activity questionnaire short form (IPAQ-SF): A systematic review. *Int. J. Behav. Nutr.*  
34 *Phys. Act.* 2011; **8**: 115.  
35
- 36 52 Cleland C, Ferguson S, Ellis G, Hunter RF. Validity of the International Physical  
37 Activity Questionnaire (IPAQ) for assessing moderate-to-vigorous physical activity  
38 and sedentary behaviour of older adults in the United Kingdom. *BMC Med Res*  
39 *Methodol* 2018; **18**. DOI:10.1186/s12874-018-0642-3.  
40
- 41 53 Kowalski K, Rhodes R, Naylor P-J, Tuokko H, MacDonald S. Direct and indirect  
42 measurement of physical activity in older adults: a systematic review of the literature.  
43 *Int J Behav Nutr Phys Act* 2012; **9**: 148.  
44  
45  
46  
47  
48  
49  
50  
51  
52  
53  
54  
55  
56  
57  
58  
59  
60



|                                                 | <b>Participant characteristic</b>             | <b>Total</b>     | <b>Percent</b> |
|-------------------------------------------------|-----------------------------------------------|------------------|----------------|
| <b>Gender</b>                                   | Female                                        | 3,445            | 55.4%          |
|                                                 | Male                                          | 2,770            | 44.5%          |
|                                                 | Prefer not to say                             | 4                | 0.1%           |
| <b>Age (years)</b>                              | Mean (SD)                                     | 69.9 (7.3)       |                |
|                                                 | Median (IQR)                                  | 70 (66-74)       |                |
|                                                 | Range                                         | 50 - 92          |                |
|                                                 | 50-64                                         | 1,212            | 19.5%          |
|                                                 | 65-74                                         | 3,440            | 55.3%          |
|                                                 | 75-84                                         | 1,394            | 22.4%          |
|                                                 | 85+                                           | 127              | 2.0%           |
|                                                 | Missing                                       | 46               | 0.7%           |
| <b>Ethnicity</b>                                | <b>White</b>                                  | <b>5,825</b>     | <b>93.7%</b>   |
|                                                 | English/Welsh/Scottish/Northern Irish/British | 5,143            | 82.7%          |
|                                                 | Any other white background                    | 536              | 8.6%           |
|                                                 | Irish                                         | 146              | 2.3%           |
|                                                 | <b>Mixed/multiple ethnic groups</b>           | <b>99</b>        | <b>1.6%</b>    |
|                                                 | White and Black African                       | 10               | 0.2%           |
|                                                 | White and Asian                               | 33               | 0.5%           |
|                                                 | White and Black Caribbean                     | 7                | 0.1%           |
|                                                 | Any other mixed/multiple ethnic background    | 49               | 0.8%           |
|                                                 | <b>Asian/Asian British</b>                    | <b>174</b>       | <b>2.8%</b>    |
|                                                 | Indian                                        | 91               | 1.5%           |
|                                                 | Pakistani                                     | 12               | 0.2%           |
|                                                 | Bangladeshi                                   | 2                | 0.0%           |
|                                                 | Chinese                                       | 32               | 0.5%           |
|                                                 | Any other Asian background                    | 37               | 0.6%           |
|                                                 | <b>Black/African/Caribbean/Black British</b>  | <b>43</b>        | <b>0.7%</b>    |
|                                                 | African                                       | 13               | 0.2%           |
| Caribbean                                       | 21                                            | 0.3%             |                |
| Any other Black/African/Caribbean/Black British | 9                                             | 0.1%             |                |
| <b>Other ethnic group</b>                       | <b>64</b>                                     | <b>1.0%</b>      |                |
| Arab                                            | 17                                            | 0.3%             |                |
| Any other ethnic group                          | 47                                            | 0.8%             |                |
|                                                 | <b>Prefer not to say</b>                      | <b>14</b>        | <b>0.2%</b>    |
| <b>Body Mass Index (BMI) (Kg/m<sup>2</sup>)</b> | Mean (SD)                                     | 25.3 (5.1)       |                |
|                                                 | Median (IQR)                                  | 24.4 (22.2-27.1) |                |
|                                                 | <18.5 (underweight range)                     | 61               | 1.0%           |
|                                                 | 18.5-24.9 (healthy weight)                    | 1,644            | 26.4%          |
|                                                 | 25.0-29.9 (overweight)                        | 962              | 15.5%          |
|                                                 | >=30.0 (obese range)                          | 358              | 5.8%           |
|                                                 | Missing data                                  | 3,194            | 51.4%          |
| <b>Shielding at time of questionnaire</b>       | No                                            | 4,591            | 73.8%          |
|                                                 | Yes                                           | 1,628            | 26.2%          |
| <b>Marital status</b>                           | Married                                       | 3,869            | 62.2%          |
|                                                 | Single                                        | 789              | 12.7%          |
|                                                 | Widowed                                       | 601              | 9.7%           |
|                                                 | Divorced                                      | 595              | 9.6%           |

|                                |                                                                  |              |       |
|--------------------------------|------------------------------------------------------------------|--------------|-------|
|                                | Living with a partner                                            | 365          | 5.9%  |
| <b>Living arrangements</b>     | Co-habiting                                                      | 4,530        | 72.8% |
|                                | Living alone                                                     | 1,689        | 27.2% |
|                                | Retired                                                          | 4,322        | 69.5% |
| <b>Employment</b>              | Continuing to work in your usual job; at home                    | 1,101        | 17.7% |
|                                | None of the above                                                | 201          | 3.2%  |
|                                | Furloughed                                                       | 197          | 3.2%  |
|                                | Continuing to work in your usual job and leave home for your job | 141          | 2.3%  |
|                                | A key worker                                                     | 96           | 1.5%  |
|                                | Had to close your business due to COVID-19                       | 70           | 1.1%  |
|                                | Lost my job due to the lockdown                                  | 42           | 0.7%  |
|                                | Unemployed                                                       | 36           | 0.6%  |
|                                | A student                                                        | 13           | 0.2%  |
|                                | <b>Current smoker</b>                                            | No           | 6,027 |
| Yes                            |                                                                  | 192          | 3.1%  |
| <b>Alcohol intake</b>          | No                                                               | 1,083        | 17.4% |
|                                | Yes                                                              | 5,136        | 82.6% |
| <b>Diet</b>                    | No change from usual - already had a healthy diet                | 4,991        | 80.3% |
|                                | My diet has become more healthy                                  | 715          | 11.5% |
|                                | My diet was healthy before but has got worse since lockdown      | 312          | 5.0%  |
|                                | No change from usual - my diet isn't very healthy                | 201          | 3.2%  |
| <b>FRAIL scale</b>             | Robust                                                           | 5,055        | 81.3% |
|                                | Pre-frail                                                        | 1,117        | 18.0% |
|                                | Frail                                                            | 34           | 0.5%  |
|                                | Missing                                                          | 13           | 0.2%  |
| <b>HADS (depression score)</b> | Normal (0-7)                                                     | 4,658        | 74.9% |
|                                | Borderline (8-10)                                                | 312          | 5.0%  |
|                                | Abnormal (11-21)                                                 | 116          | 1.9%  |
|                                | Missing                                                          | 1,133        | 18.2% |
| <b>HADS (anxiety score)</b>    | Normal (0-7)                                                     | 4,335        | 69.7% |
|                                | Borderline (8-10)                                                | 486          | 7.8%  |
|                                | Abnormal (11-21)                                                 | 265          | 4.3%  |
|                                | Missing                                                          | 1133         | 18.2% |
| <b>Total participants</b>      |                                                                  | <b>6,219</b> |       |

| Physical activity type                  |                           | Before             | During             | p value for difference |
|-----------------------------------------|---------------------------|--------------------|--------------------|------------------------|
| <b>Vigorous activity</b>                | Mean (SD) minutes/week    | 145 (276)          | 135 (253)          | 0.004                  |
|                                         | Median (IQR) minutes/week | 40 (0 - 180)       | 10 (0 - 180)       |                        |
| <b>Moderate activity (minutes/week)</b> | Mean (SD) minutes/week    | 292 (430)          | 245 (374)          | <0.001                 |
|                                         | Median (IQR) minutes/week | 120 (0 - 360)      | 120 (0-360)        |                        |
| <b>Walking (minutes/week)</b>           | Mean (SD) minutes/week    | 462 (460)          | 403 (408)          | <0.001                 |
|                                         | Median (IQR) minutes/week | 360 (150 - 630)    | 315 (150 - 525)    |                        |
| <b>Sitting (minutes/week) *</b>         | Mean (SD) minutes/week    | 2404 (1137)        | 2680 (1181)        | <0.001                 |
|                                         | Median (IQR) minutes/week | 2100 (1680 - 2940) | 2520 (1680 - 3360) |                        |
| <b>MET minutes/week</b>                 | Mean (SD) minutes/week    | 3519 (2867)        | 3185 (2673)        | <0.001                 |
|                                         | Median (IQR) minutes/week | 2772 (1386 - 4650) | 2440 (1386 - 4185) |                        |



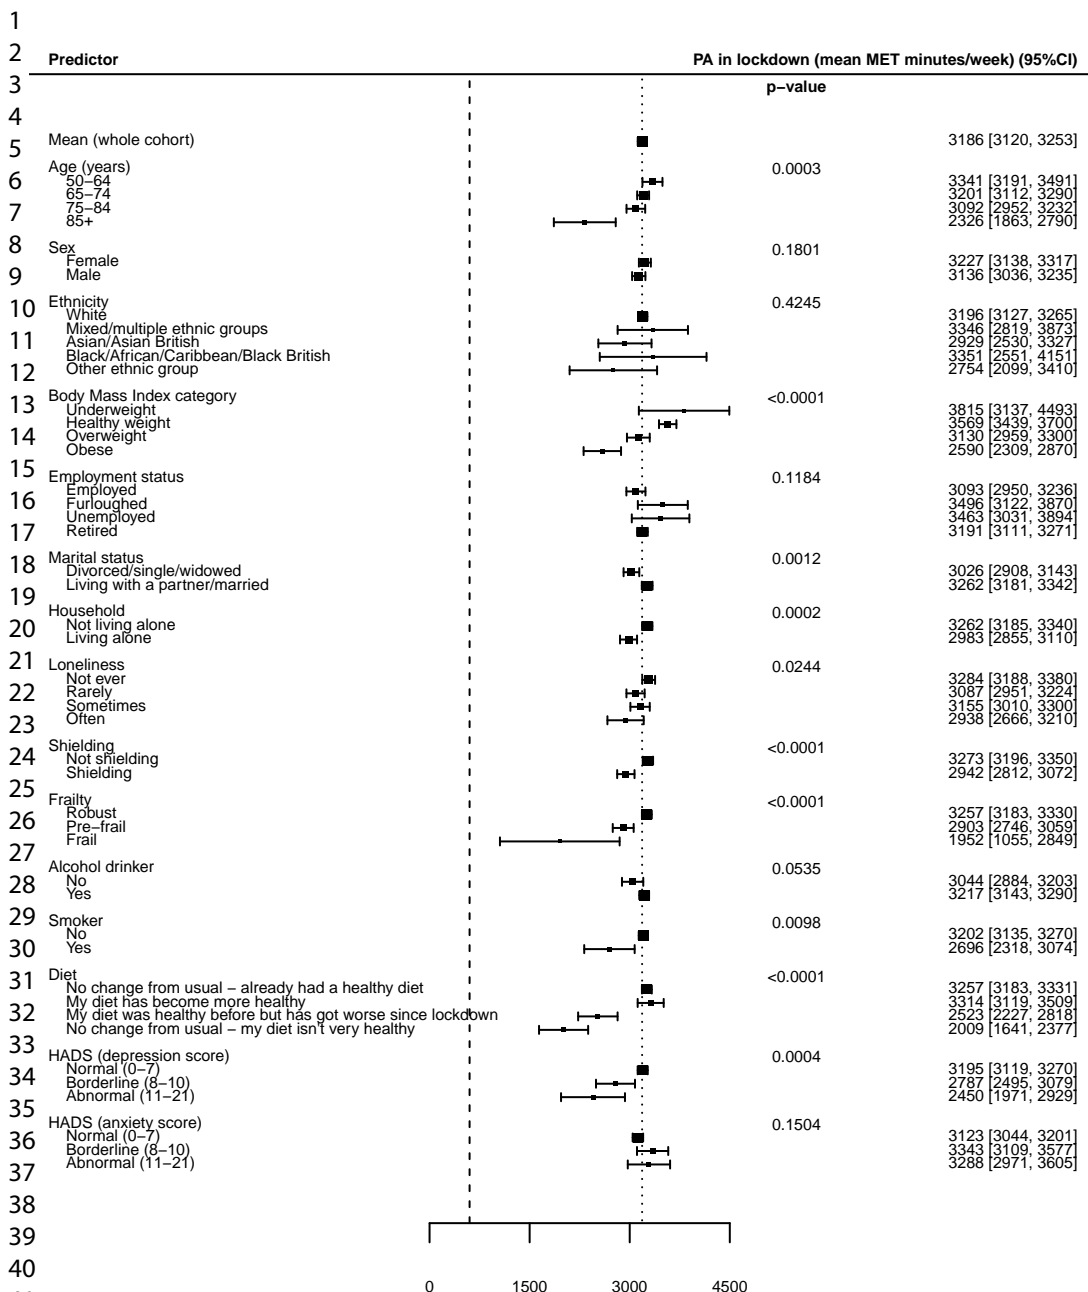

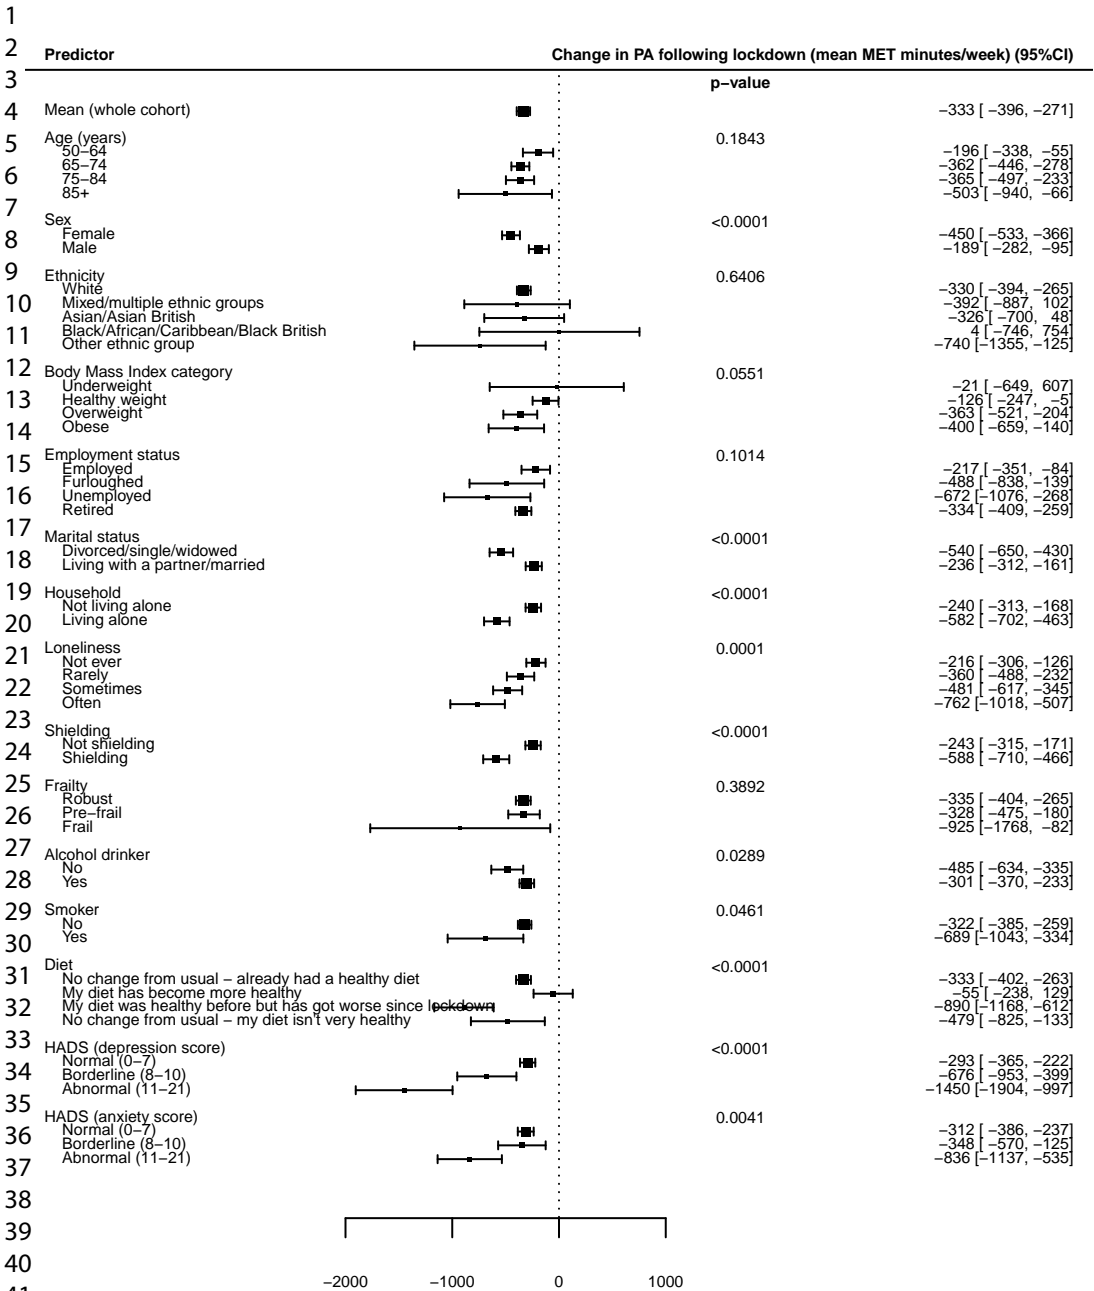

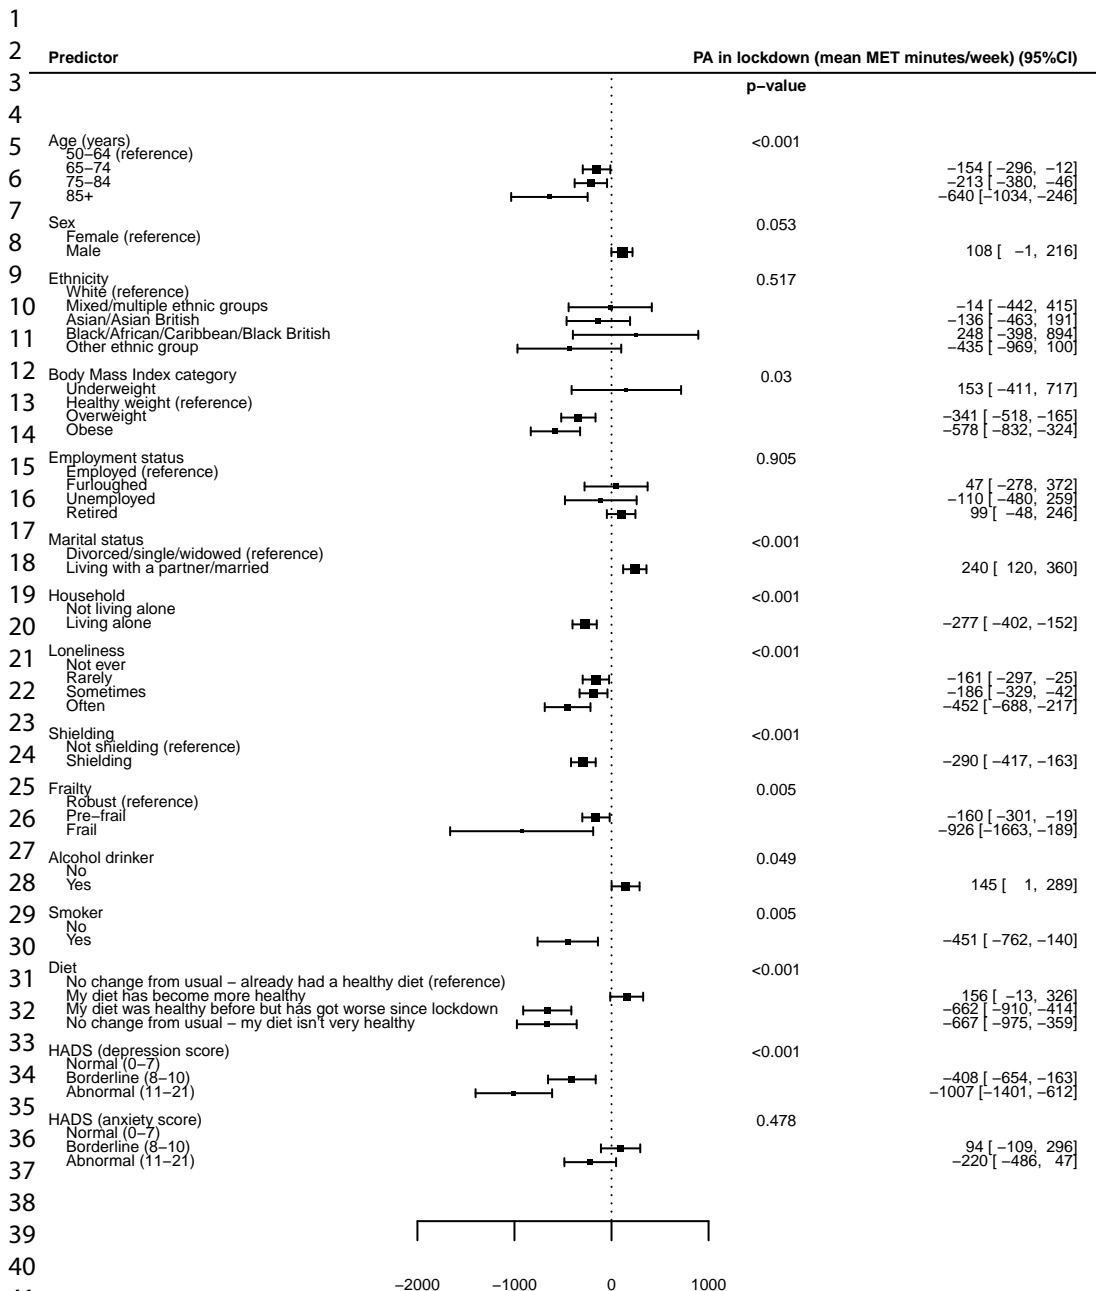

### Table and figure captions

Table 1: Participant characteristics for 6,219 participants with complete data on physical activity; HADS – Hospital Anxiety and Depression Score

Table 2: Physical activity and sitting time for recipients before and following introduction of lockdown measures. Data presented as minutes per week with both mean (standard deviation) and median (interquartile range) shown. p-values from paired t-test; \*denominator 6,023; MET - Metabolic Equivalent of Task

Figure 1: Forest plot of unadjusted univariable associations with physical activity (PA) during lockdown. Data presented as mean MET minutes/week +/- 95% confidence interval. Heavy dashed line – 600 MET minutes/week (WHO minimal physical activity guideline for adults); light dashed line – mean MET minutes for the whole cohort. See also supplementary file 2: table 2; HADS – Hospital Anxiety and Depression Score; MET – Metabolic Equivalent of Task; PA – Physical Activity; WHO – World Health Organization

Figure 2: Forest plot of unadjusted mean change in physical activity (PA) for all variables (mean MET minutes/week +/- 95% confidence interval). Negative values indicate a decline in activity after lockdown compared to before lockdown. See also supplementary file 2: table 2; HADS – Hospital Anxiety and Depression Score; MET – Metabolic Equivalent of Task; PA – Physical Activity

Figure 3: Forest plot of multivariable associations with physical activity after lockdown, adjusted for age, sex, ethnicity, month of year of survey completion and baseline physical activity. Data presented as mean MET minutes/week +/- 95% confidence interval, compared to the reference group, with negative values indicating lower physical activity than the reference. See also supplementary file 2: table 3; HADS – Hospital Anxiety and Depression Score; MET – Metabolic Equivalent of Task; PA – Physical Activity

CHARIOT COVID-19 Rapid Response (CCRR) Study

Baseline Survey

Please answer all the questions in this survey before submitting it. Follow the prompts for those questions that are not applicable to you.

Symptoms

Q1. In the last week, have you had a cough?

<1> No

<2> Yes

Q2. In the last week, have you experienced unusual shortness of breath (difficulty breathing) compared to what's normal for you?

<1> No

<2> Yes, but it did not affect my normal activities

<3> Yes, it did affect my normal activities (eg walking short distances)

<4> Yes, even when I was sitting or lying down

Q3. In the last week, have you had a fever (feeling too hot) and did you take your temperature?

<1> I have NOT felt feverish

<2> I have felt feverish but did not check my temperature

<3> I felt feverish and my temperature was equal to, or BELOW 38 degrees Celcius

<4> I felt feverish and my temperature measured ABOVE 38 degrees Celcius

Q4. In the last week, have you experienced any of these other symptoms? Please do NOT include symptoms you experience on a regular basis due to a health condition you already know about. Please tick all that apply:

<1> Loss of sense of smell

<2> Loss of sense of taste

<3> Decrease in appetite (skipping meals)

<4> Diarrhoea

<5> Nauseas and/or Vomiting

<6> Abdominal pain/tummy ache

<7> Chills (feeling too cold)

<8> Difficulty sleeping

1  
2  
3  
4  
5  
6  
7  
8  
9  
10  
11  
12  
13  
14  
15  
16  
17  
18  
19  
20  
21  
22  
23  
24  
25  
26  
27  
28  
29  
30  
31  
32  
33  
34  
35  
36  
37  
38  
39  
40  
41  
42  
43  
44  
45  
46  
47  
48  
49  
50  
51  
52  
53  
54  
55  
56  
57  
58  
59  
60

<9> *Felt more tired than normal*

<10> *Severe Fatigue*

<11> *Sneezing*

<12> *Chest pain / tightness*

<13> *Tightness in chest*

<14> *Sore throat*

<15> *Hoarse voice*

<16> *Runny nose*

<17> *Blocked nose*

<18> *Sore eyes*

<19> *Itchy eyes*

<20> *Headache*

<21> *Joint pain / aches*

<22> *Dizziness*

<23> *Muscle pain/aches*

<99> *None of these*

*If you answered, 'None of these', please skip Q5 and go to Q6.*

*Q5. Thinking about the 14 days before your symptoms started, had you been in physical contact (within 2 metres / 6 feet) with someone who has a confirmed diagnosis of coronavirus (Covid-19), or someone with the following symptoms: dry cough, fever, loss of sense of smell, loss of sense of taste, shortness of breath or difficulty breathing.*

<1> *Yes, and it was an individual within my household*

<2> *Yes, and it was an individual from outside my household*

<3> *No, not that I am aware of*

*QX Since COVID-19 emerged in January, but before the official lockdown started on March 23rd 2020, which, if any of the following, have you experienced? Please do NOT include symptoms you experience on a regular basis due to a health condition you already know about. Please tick all that apply.*

<1> *New, continuous cough (coughing a lot for more than an hour, or have had 3 coughing episodes in 24 hours)*

<2> *High temperature (hot to touch on chest or back)*

<3> *Loss of sense of smell*

<4> *Loss of sense of taste*

<5> *Loss of appetite (skipping meals)*

<6> *Diarrhoea*

<7> *Vomiting*

<8> *Fatigue*

<9> *Sneezing*

<10> *Chest pain / tightness*

1  
2  
3 <11> Sore throat

4 <12> Runny nose

5 <13> Itchy eyes

6 <14> Headache

7 <15> Joint pain / aches

8 <16> Muscle or joint pain

9 <99> None of these

10  
11  
12  
13  
14  
15  
16 If you answered, 'None of these', go to Q6.

17  
18  
19 QXa Approximately when did you start experiencing these symptoms?

20  
21  
22 [DD/MM/YYYY]

23  
24  
25 QXb Approximately how long did these symptoms last?

26 [Days: ]

27  
28 QXX Thinking about the 14 days before your symptoms started, had you been in  
29 physical contact (within 2 metres / 6 feet) with someone who has a confirmed  
30 diagnosis of coronavirus (Covid-19), or someone with the following symptoms: dry  
31 cough, fever, loss of sense of smell, loss of sense of taste, shortness of breath or  
32 difficulty breathing.

33 <1> Yes, and it was an individual within my household

34 <2> Yes, and it was an individual from outside my household

35 <3> No, not that I am aware of

36  
37 Q6 Now, thinking about the period prior to last week, but after the official lockdown  
38 started on 23rd March 2020, which, if any of the following, have you experienced?  
39 Please do NOT include symptoms you experience on a regular basis due to a health  
40 condition you already know about. Please tick all that apply.

41 <1> Fever (feeling too hot)

42 <2> New persistent cough

43 <3> Shortness of breath affecting normal activities

44 <4> Loss of sense of smell

45 <5> Loss of sense of taste

46 <6> Decrease in appetite (skipping meals)

47 <7> Diarrhoea

48 <8> Nauseas and/or vomiting

49 <9> Abdominal pain/tummy ache

50 <10> Chills (feeling too cold)

51 <11> Difficulty sleeping

52 <12> Felt more tired than normal

53 <13> Severe fatigue

1  
2  
3  
4 <14> Sneezing

5 <15> Chest pain

6  
7 <16> Tightness in chest

8 <17> Sore throat

9  
10 <18> Hoarse throat

11 <19> Runny nose

12 <20> Blocked nose

13 <21> Sore eyes

14 <22> Itchy eyes

15 <23> Headache

16  
17 <24> Dizziness

18 <25> Joint pain / aches

19 <26> Muscle pain/aches

20  
21  
22  
23  
24  
25  
26  
27  
28  
29  
30  
31  
32  
33  
34  
35  
36  
37  
38  
39  
40  
41  
42  
43  
44  
45  
46  
47  
48  
49  
50  
51  
52  
53  
54  
55  
56  
57  
58  
59  
60  
If you answered, 'None of these', go to Q8.

Q6a Approximately when did you start experiencing these symptoms?

[DD/MM/YYYY]

Q6b Approximately how long did these symptoms last?

[Days: ]

Q7 Thinking about the 14 days before your symptoms started, had you been in physical contact (within 2 metres / 6 feet) with someone who has a confirmed diagnosis of coronavirus (Covid-19), or someone with the following symptoms: dry cough, fever, loss of sense of smell, loss of sense of taste, shortness of breath or difficulty breathing.

<1> Yes, and it was an individual within my household

<2> Yes, and it was an individual from outside my household

<3> No, not that I am aware of

Q8 Have you or anyone in your house been tested for coronavirus? Please tick all that apply

<1> No testing

<2> I have not been tested -- BUT I think I have already had coronavirus and recovered

<3> I was tested - positive result

<4> I was tested - awaiting result

<5> I was tested - negative result

<6> Household member tested - positive result

<7> Household member tested - awaiting result



1  
2  
3  
4 <8> Household member tested - negative result  
5  
6  
7

8 Q9 In the last week, has anyone in your household had a new cough or fever?  
9

10 Not applicable  
11

12  
13 <1> No

14 <2> Yes  
15  
16  
17

18  
19  
20  
21 Q10 Have you had any healthcare contact since the lockdown started? Please tick  
22 all that apply  
23

24  
25 <1> No

26 <2> Yes - remote appointment with my GP (phone/video)

27 <3> Yes - I attended my GP practice for an appointment

28 <4> Yes - remote appointment with hospital (phone/video)

29 <5> Yes - I attended hospital for an appointment

30 <6> Yes - attended Accident and Emergency

31 <7> Yes -- I was admitted to hospital (not because of coronavirus)

32 <8> Yes -- I was admitted to hospital with symptoms of coronavirus

33 <9> Yes – One or more remote calls to 111- home visit by ambulance  
34  
35  
36  
37  
38  
39

40  
41 Q11. In the last week, have you been taking any medication for new symptoms?  
42

43 <1> No

44 <2> Yes

45 <3> If yes, what medication?  
46  
47  
48  
49

50 Underlying conditions

51 For the following question, please remember that your answers are always treated  
52 confidentially and are never analysed individually. We have provided you with a  
53 "Prefer not to say" option if you would rather not share your experiences.  
54

55 Q12 Which, if any, of the following chronic health conditions have you been  
56 diagnosed with? (Please select all that apply. If you do not currently have a chronic  
57 health condition, please select the 'None of these' option)

58 <1> Arthritis

59 <2> Asthma  
60

- 1  
2  
3  
4 <3> *My doctor has told me I have severe asthma*
- 5  
6 <4> *I am having cancer treatment*
- 7  
8 <5> *Blood or bone marrow cancer, such as leukaemia*
- 9  
10 <6> *Cystic fibrosis*
- 11  
12 <7> *Chronic obstructive pulmonary disease (COPD)*
- 13  
14 <8> *Diabetes*
- 15  
16 <9> *Epilepsy*
- 17  
18 <10> *Heart disease*
- 19  
20 <11> *High blood pressure*
- 21  
22 <12> *High cholesterol*
- 23  
24 <13> *HIV/ AIDS*
- 25  
26 <14> *Mental health condition*
- 27  
28 <15> *Multiple Sclerosis*
- 29  
30 <16> *I have had an organ transplant*
- 31  
32 <17> *I have a condition that makes me much more likely to get infections*
- 33  
34 <18> *I am taking medicine that weakens my immune system*
- 35  
36 <19> *Dementia, Parkinson's or other neurological disease*
- 37  
38 <98> *Prefer not to say*
- 39  
40 <99> *None of these*

41  
42  
43  
44  
45  
46  
47  
48  
49  
50  
51  
52  
53  
54  
55  
56  
57  
58  
59  
60

*Contacts*

[Q13 *What is your date of birth:*

*Date ..... ]*

Q14 *What is your sex:*

<1> *Female*

<2> *Male*

<3> *Prefer not to say*

Q15 *What ethnic group best describes you? Please select one option only.*

<1>

*English / Welsh /  
Scottish / Northern  
Irish / British*

<11>

*Bangladeshi*

1  
2  
3  
4 <2>  
5 *Irish*  
6 <12>  
7  
8 *Chinese*  
9 <3>  
10  
11 *Gypsy or Irish*  
12 *Traveller*  
13 <13>  
14  
15 *Any other Asian*  
16 *background*  
17 <4>  
18  
19 *Any other White*  
20 *background*  
21 <14>  
22  
23 *African*  
24 <5>  
25  
26 *White and Black*  
27 *Caribbean*  
28 <15>  
29  
30 *Caribbean*  
31 <6>  
32  
33 *White and Black*  
34 *African*  
35 <16>  
36  
37 *Any other Black /*  
38 *African /*  
39 *Caribbean*  
40 *background*  
41 <7>  
42  
43 *White and Asian*  
44 <17>  
45  
46 *Arab*  
47 <8>  
48  
49 *Any other Mixed /*  
50 *Multiple ethnic*  
51 *background*  
52 <18 fixed>  
53  
54 *Any other ethnic*  
55 *group*  
56 <9>  
57  
58 *Indian*  
59 <19 fixed>  
60  
*Prefer not to say*

1  
2  
3  
4  
5  
6  
7  
8  
9  
10  
11  
12  
13  
14  
15  
16  
17  
18  
19  
20  
21  
22  
23  
24  
25  
26  
27  
28  
29  
30  
31  
32  
33  
34  
35  
36  
37  
38  
39  
40  
41  
42  
43  
44  
45  
46  
47  
48  
49  
50  
51  
52  
53  
54  
55  
56  
57  
58  
59  
60

<10>

*Pakistani*

Q16 Who else is CURRENTLY living in your household? Please tick all that apply

<1> I live by myself

<2> I live with my partner

<3> I live with my child/children aged under 18

<4> I live with my child/children aged over 18

<5> I live with family members other than partner / children

<6> I live with housemates

16a Where are you living during lockdown?

<1> My usual home

<2> not my usual home – keeping away from household members who are at high risk coronavirus

<3> Not my usual home – other reason

Q17 How many people, including yourself, are there in your household? Please include both adults and children. If you live alone, enter 1

Number

Q17a

For each household member ask age (in years) and sex

The following questions will ask you to report on how many people you have come into contact with both inside and outside of your household.

A contact is defined as either:

- Direct skin-to-skin physical contact (e.g. kiss/embrace/handshake)
- Face-to-face conversation with another person which lasts over 3 mins, within 2m distance
- Being within 2m distance from another individual for over 5 mins

Note: if you contacted the same person in different times through the day, they should be counted once.

Q18 How many different people did you have contact with, both inside your household and while outside (after having left your household) in the past 7 days?

1  
2  
3 Enter 0 if you had no contacts in the last 7 days

4 1. (enter number)

5  
6 2. Don't know

7  
8  
9 Q19a Among the contacts you had, just from yesterday, both inside your household  
10 and while outside (after having left your household), how many belonged to the  
11 following age groups?

12  
13  
14  
15 No contacts yesterday

16  
17  
18 0 to <10 years old (enter number)

19  
20  
21 10 to <20 years old (enter number)

22  
23  
24 20 to <30 years old (enter number)

25  
26  
27 30 to <40 years old (enter number)

28  
29  
30 40 to <50 years old (enter number)

31  
32  
33 50 to <60 years old (enter number)

34  
35  
36 60 to <70 years old (enter number)

37  
38  
39 70 to <80 years old (enter number)

40  
41  
42 80 to <90 years old (enter number)

43  
44  
45 90+ years old (enter number)

46  
47  
48 12. Don't know

49  
50  
51 IF Q18 is NOT=0

52  
53  
54 Q19b How many different people did you come in contact with in the past 7 days  
55 outside of your household?

56  
57  
58 Enter 0 if you had no contacts in the last 7 days outside of your household

59  
60 1. (enter number)

1  
2  
3  
4 2. Don't know  
5

6  
7 IF Q19b is NOT=0  
8  
9

10 Q19c Among the contacts you had, just from yesterday, outside your household,  
11 how many belonged to the following age groups?  
12

13  
14 No contacts yesterday  
15

16  
17 0 to <10 years old (enter number)  
18

19  
20 10 to <20 years old (enter number)  
21

22  
23 20 to <30 years old (enter number)  
24

25  
26 30 to <40 years old (enter number)  
27

28  
29 40 to <50 years old (enter number)  
30

31  
32 50 to <60 years old (enter number)  
33

34  
35 60 to <70 years old (enter number)  
36

37  
38 70 to <80 years old (enter number)  
39

40  
41 80 to <90 years old (enter number)  
42

43  
44 90+ years old (enter number)  
45

46  
47 Don't know  
48

49  
50  
51 IF Q19b is NOT=0  
52

53  
54 Q19c Among the contacts that you have had in the past 7 days outside your  
55 household, how many contacts occurred at work?  
56

57  
58 Enter 0 if you had no contacts in the last 7 days outside of your household that  
59 occurred at work  
60

1  
2  
3  
4  
5 1. (enter number)  
6  
7

8 2. Don't know  
9

10 For the following questions please answer according to the following terms;

11 Self-isolation – refers to those who are symptomatic and self-isolating for 7  
12 days from when symptoms started

13 Shielding – those in specific vulnerable groups staying at home for 12 weeks.  
14 These groups would include those with underlying chronic health conditions:  
15 cancers, respiratory disease, on immunosuppressants, those at increased risk  
16 of infection or pregnant women with heart disease and/or those advised by the  
17 NHS of their extremely vulnerable status'.  
18

19 Household quarantine – 14-day quarantine period for all members of a  
20 household from the first day of symptom onset in first case in that household

21 Social distancing and isolation

22 Q20 Are you currently in self-isolation?

23 <1> Yes

24 <2> No

25 If yes, for how long: ...days

26 Q21 Are you currently shielding as per government guidelines for vulnerable groups?

27 <1> Yes

28 <2> No

29 Q22 Have you moved residence recently due to the pandemic? Y/N

30 Q23. Are you single, married, living with a partner, divorced, widowed?

31 Q24. Are you

32 <1> Continuing to work in your usual job; at home

33 <2> Continuing to work in your usual job and leave home for your job <3>  
34 volunteering in response to the COVID pandemic

35 <4> a key worker

36 <5> unemployed

37 <6> retired

38 <7> furloughed (put on leave, still getting paid)

39 <8> had to close your business due to COVID-19

40 <9> lost my job due to the lockdown

41 <10> a student

42 <99> None of the above

43 Q25. How often are you now contacting friends/family members remotely  
44 (Skype/Zoom/Mobile/landline phone etc)?

45 Several times per day, once a day, 2-3 x per week, 4-6 x per week, once a week,  
46 less than once a week?  
47  
48  
49  
50  
51  
52  
53  
54  
55  
56  
57  
58  
59  
60

1  
2  
3  
4 Q26 Overall, how are your relationships with other members of your household?  
5

6 Not applicable

7 1 = worst

8 2

9 3

10 4

11 5

12 6

13 7

14 8

15 9

16 10 = best

17  
18  
19  
20  
21  
22  
23  
24 Q27 If you are leaving your home, what activity is this for? Please tick all that apply

25  
26  
27 <1> I am not leaving my home

28 <2> Commute to work

29 <3> Essential shopping

30 <4> Exercise

31  
32  
33 <5> Other

34  
35  
36  
37 Q28 Have you or anyone in your household received a letter or message informing  
38 you that you are in the population at 'high risk' from coronavirus? Please tick all that  
39 apply.

40  
41 <1> No - Neither myself or anyone in my household is at 'high risk'

42 <2> No - but I think I should have

43 <3> No - but someone in my household is at 'high risk'

44 <4> Yes - letter about me

45 <5> Yes - letter about someone in my household

46  
47  
48  
49  
50 Health behaviours: dietary, alcohol and smoking

51 Q29 Do you drink alcohol?

52 <1> Yes (If yes trigger sub-questions)

53 Drinking less since lockdown

54 Drinking the same amount since lockdown

55 Drinking more since lockdown

56  
57  
58  
59 How many units do you consume per week: ...units  
60



1  
2  
3  
4 *(half pint/ 300ml = approx. 1 unit, 175ml glass wine= approx. 2 units)*  
5  
6

7 <2> *No (If no, trigger sub-questions)*

8 *I never drink alcohol*

9  
10 *I had already stopped drinking alcohol before lockdown*

11 *I stopped drinking alcohol when lockdown started*  
12  
13

14 Q30 *Do you smoke?*

15  
16 <1> *Yes (if yes, trigger sub-questions)*

17 *Smoking less since lockdown*

18 *Smoking the same amount since lockdown*

19 *Smoking more since lockdown*

20 *If yes, how many cigarettes or roll-ups do you smoke per day:...*

21  
22 <2> *No (if now, trigger sub-questions)*

23  
24  
25 *I never smoked*

26  
27 *I had already stopped smoking before lockdown*

28  
29 *I stopped smoking since the lockdown*  
30  
31

32 Q30a *Has there been a change in your vaping (e-cigarettes) status since the*  
33 *coronavirus lockdown?*

34  
35  
36 <1> *I never vaped*

37 <2> *I had already stopped vaping before*

38 <3> *I stopped vaping since the lockdown*

39 <4> *Vaping less*

40 <5> *Vaping the same amount*

41 <6> *Vaping more*  
42  
43  
44  
45

46 Q31 *Since the lockdown, are you managing to keep a healthy diet, for example,*  
47 *eating fresh fruits and vegetables?*

48  
49  
50 <1> *No change from usual - already had a healthy diet*

51 <2> *No change from usual - my diet isn't very healthy*

52 <3> *My diet has become more healthy*

53 <4> *My diet was healthy before but has got worse since lockdown*  
54  
55  
56

57 Q32 *On average, how many portions (or servings) of fruit and vegetables do you eat*  
58 *per day?.....*  
59  
60

1  
2  
3 - One portion is typically 80g, 3 heaped tablespoons of cooked veg or 1 cereal  
4 bowl of mixed salad  
5 - Three heaped tablespoons of beans and other pulse vegetables, such as  
6 kidney beans, lentils and chickpeas, count as 1 portion.  
7 - The following starchy vegetables should not be included – potatoes, yams,  
8 cassava and plantain

9 Q32a Have you ever skipped meals due to difficulties accessing food as a result of  
10 COVID-19?

11 Yes /No

12 If yes:

13 How many meals per week, on average have you missed?

14 <1> 1-3 meals per week

15 <2> 4-6 meals per week

16 <4> 7-9 meals per week

17 <5> 10 or more meals per week

18  
19  
20  
21  
22  
23  
24  
25 Biometric data: height and weight

26 Q33 Please enter your weight: Kg

27 Q34 Please enter your height:...cm

28 Q35 Do you have a recent (from the past week) blood pressure? \_\_\_\_\_mm/Hg

29  
30  
31 Current Physical activity: International Physical Activity Questionnaire

32 We are interested in finding out about the kinds of physical activities that people do  
33 as part of their everyday lives. The questions will ask you about the time you spent  
34 being physically active in the last 7 days. Please answer each question even if you  
35 do not consider yourself to be an active person. Please think about the activities you  
36 do at work, as part of your house and garden work, to get from place to place, and in  
37 your spare time for recreation, exercise or sport.

38  
39 Think about all the vigorous activities that you did in the last 7 days. Vigorous  
40 physical activities refer to activities that take hard physical effort and make you  
41 breathe much harder than normal. Think only about those physical activities that you  
42 did for at least 10 minutes at a time.

43  
44  
45 Q36: During the last 7 days, on how many days did you do vigorous physical  
46 activities like heavy lifting, digging, aerobics, or fast bicycling?

47  
48 \_\_\_\_\_ days per week

49  
50  
51 If no vigorous physical activities, skip to question 38

52  
53  
54 Q37: How much time did you usually spend doing vigorous physical activities on  
55 one of those days? If you only exercised in hours or minutes, please input a '0' in the  
56 non-applicable field.

57  
58  
59 \_\_\_\_\_ hours per day  
60

1  
2  
3  
4 \_\_\_\_\_ minutes per day  
5  
6

7 *Think about all the moderate activities that you did in the last 7 days. Moderate*  
8 *activities refer to activities that take moderate physical effort and make you breathe*  
9 *somewhat harder than normal. Think only about those physical activities that you*  
10 *did for at least 10 minutes at a time.*

11 **Q38:** *During the last 7 days, on how many days did you do moderate physical*  
12 *activities like carrying light loads or bicycling at a regular pace? Do not include*  
13 *walking.*

14  
15 \_\_\_\_\_ days per week  
16

17  
18 *If no moderate physical activities, skip to question 40*  
19

20  
21 **Q39:** *How much time did you usually spend doing moderate physical activities on*  
22 *one of those days? If you only exercised in hours or minutes, please input a '0' in the*  
23 *non-applicable field.*

24  
25  
26 \_\_\_\_\_ hours per day

27 \_\_\_\_\_ minutes per day  
28  
29

30  
31 *Think about the time you spent walking in the last 7 days. This includes at work*  
32 *and at home, walking to travel from place to place, and any other walking that you*  
33 *have done solely for recreation, sport, exercise, or leisure.*

34  
35 **Q40:** *During the last 7 days, on how many days did you walk for at least 10 minutes*  
36 *at a time?*

37  
38  
39 \_\_\_\_\_ days per week  
40

41  
42  
43 *No walking, skip to question 42*  
44

45  
46 **Q41:** *How much time did you usually spend walking on one of those days? If you*  
47 *only exercised in hours or minutes, please input a '0' in the non-applicable field.*

48  
49  
50 \_\_\_\_\_ hours per day

51 \_\_\_\_\_ minutes per day  
52  
53

54 *The last question is about the time you spent sitting on weekdays during the last 7*  
55 *days. Include time spent at work, at home, while doing course work and during*  
56 *leisure time. This may include time spent sitting at a desk, reading, or sitting or lying*  
57 *down to watch television.*

58  
59  
60 **Q42:** *During the last 7 days, how much time did you spend sitting on a week day?*

1  
2  
3 If you only exercised in hours or minutes, please input a '0' in the non-applicable  
4 field.

5  
6  
7 \_\_\_\_\_ hours per day

8 \_\_\_\_\_ minutes per day  
9

10  
11  
12 *Previous Physical activity: International Physical Activity Questionnaire*

13 *These questions will ask you about the time you spent being physically active in the*  
14 *7 days prior to implementation of social distancing measures (please use first*  
15 *week of March 2020). Please answer each question even if you do not consider*  
16 *yourself to be an active person. Please think about the activities you do at work, as*  
17 *part of your house and garden work, to get from place to place, and in your spare*  
18 *time for recreation, exercise or sport.*

19 *Think about all the vigorous activities that you did in the 7 days prior to social*  
20 *distancing measures. Vigorous physical activities refer to activities that take hard*  
21 *physical effort and make you breathe much harder than normal. Think only about*  
22 *those physical activities that you did for at least 10 minutes at a time.*

23  
24  
25 *Q43: During the 7 days prior to social distancing measures (please use first week*  
26 *of March 2020), on how many days did you do vigorous physical activities like*  
27 *heavy lifting, digging, aerobics, or fast bicycling?*

28  
29 \_\_\_\_\_ days per week  
30

31  
32 *If no vigorous physical activities, skip to question 45*

33  
34  
35 *Q44: How much time did you usually spend doing vigorous physical activities on*  
36 *one of those days? If you only exercised in hours or minutes, please input a '0' in the*  
37 *non-applicable field.*

38  
39 \_\_\_\_\_ hours per day

40 \_\_\_\_\_ minutes per day  
41  
42  
43

44 *Think about all the moderate activities that you did in the 7 days prior to social*  
45 *distancing measures. Moderate activities refer to activities that take moderate*  
46 *physical effort and make you breathe somewhat harder than normal. Think only*  
47 *about those physical activities that you did for at least 10 minutes at a time.*

48  
49  
50 *Q45: During the 7 days prior to social distancing measures (please use first week*  
51 *of March 2020), on how many days did you do moderate physical activities like*  
52 *carrying light loads or bicycling at a regular pace? Do not include walking.*

53  
54  
55  
56 \_\_\_\_\_ days per week  
57

58  
59 *If no moderate physical activities, skip to question 47*  
60

1  
2  
3  
4  
5  
6  
7  
8  
9  
10  
11  
12  
13  
14  
15  
16  
17  
18  
19  
20  
21  
22  
23  
24  
25  
26  
27  
28  
29  
30  
31  
32  
33  
34  
35  
36  
37  
38  
39  
40  
41  
42  
43  
44  
45  
46  
47  
48  
49  
50  
51  
52  
53  
54  
55  
56  
57  
58  
59  
60

Q46: How much time did you usually spend doing moderate physical activities on one of those days? If you only exercised in hours or minutes, please input a '0' in the non-applicable field.

\_\_\_\_\_ hours per day

\_\_\_\_\_ minutes per day

Think about the time you spent walking in the 7 days prior to social distancing measures. This includes at work and at home, walking to travel from place to place, and any other walking that you have done solely for recreation, sport, exercise, or leisure.

Q47: During the 7 days prior to social distancing measures (please use first week of March 2020), on how many days did you walk for at least 10 minutes at a time?

\_\_\_\_\_ days per week

No walking, skip to question 49

Q48: How much time did you usually spend walking on one of those days? If you only exercised in hours or minutes, please input a '0' in the non-applicable field.

\_\_\_\_\_ hours per day

\_\_\_\_\_ minutes per day

The last question is about the time you spent sitting on weekdays during 7 days prior to social distancing measures. Include time spent at work, at home, while doing course work and during leisure time. This may include time spent sitting at a desk, reading, or sitting or lying down to watch television.

Q49: During the 7 days prior to social distancing measures (please use first week of March 2020), how much time did you spend sitting on a week day? If you only exercised in hours or minutes, please input a '0' in the non-applicable field.

\_\_\_\_\_ hours per day

\_\_\_\_\_ minutes per day

Frailty Questionnaire:

Q50: Are you fatigued?

<1> Yes

<2> No

Q51: Can you walk up one flight of stairs?

<1> Yes

<2> No

Q52: Can you walk around the block?

<1> Yes

<2> No

Q53: Do you have more than 5 illnesses?

<1> Yes

<2> No

Q54: Have you lost more than 5% of your weight in the past 6 months?

<1> Yes

<2> No

Qx Have you had a fall during the COVID lockdown period?

Yes/No

If yes:

What actions were taken (select multiple where applicable):

a) No follow-up required, I did not hurt myself

b) Pain medication

c) A hospital and/or GP appointment

d) A follow-up X-ray

e) Sling/plaster cast for a fracture

1  
2  
3  
4 f) *Surgery*  
5  
6  
7  
8  
9  
10  
11  
12  
13  
14  
15  
16  
17  
18  
19

20 *Mood*

21 a) *Tick the box beside the reply that is closest to how you have been feeling*  
22 *in the past week.*

23 *Don't take too long over you replies: your immediate response is best.*

24  
25  
26 *Tick here*

27 1.

28  
29 *Tick here*

30 8.  
31  
32  
33

34 *I feel tense or 'wound up':*

35  
36  
37 *I feel as if I am slowed down:*

38  
39  
40 *Most of the time*

41  
42  
43 *Nearly all the time*

44  
45  
46 *A lot of the time*

47  
48  
49 *Very often*

50  
51  
52 *From time to time, occasionally*

53  
54  
55 *Sometimes*

56  
57  
58 *Not at all*  
59  
60

1  
2  
3  
4 *Not at all*

5  
6  
7 2.

8  
9  
10 9.

11  
12  
13 *I still enjoy the things I used to*

14 *enjoy:*

15  
16  
17 *I get a sort of frightened feeling like*  
18 *'butterflies' in the stomach:*

19  
20  
21 *Definitely as much*

22  
23  
24 *Not at all*

25  
26  
27 *Not quite so much*

28  
29  
30 *Occasionally*

31  
32  
33 *Only a little*

34  
35  
36 *Quite Often*

37  
38  
39 *Hardly at all*

40  
41  
42 *Very Often*

43  
44  
45  
46 3.

47  
48  
49 10.

50  
51  
52 *I get a sort of frightened feeling as if*  
53 *something awful is about to*

54 *happen:*

55  
56  
57  
58  
59 *I have lost interest in my appearance:*  
60



1  
2  
3  
4  
5 *Very definitely and quite badly*  
6  
7

8 *Definitely*  
9

10  
11 *Yes, but not too badly*  
12

13  
14 *I don't take as much care as I should*  
15

16  
17 *A little, but it doesn't worry me*  
18

19  
20 *I may not take quite as much care*  
21

22  
23 *Not at all*  
24

25  
26 *I take just as much care as ever*  
27

28  
29 4.  
30

31  
32 11.  
33

34  
35 *I can laugh and see the funny side*  
36

37 *of things:*  
38

39  
40 *I feel restless as I have to be on the*  
41

42 *move:*  
43

44  
45 *As much as I always could*  
46

47 *Very much indeed*  
48

49  
50 *Not quite so much now*  
51

52  
53 *Quite a lot*  
54

55  
56 *Definitely not so much now*  
57

58  
59 *Not very much*  
60

1  
2  
3  
4  
5 *Not at all*  
6  
7

8 *Not at all*  
9

10  
11 5.  
12

13  
14  
15 12.  
16

17 *Worrying thoughts go through my*  
18 *mind:*  
19

20  
21  
22 *I look forward with enjoyment to*  
23 *things:*  
24

25  
26  
27 *A great deal of the time*  
28

29  
30 *As much as I ever did*  
31

32  
33 *A lot of the time*  
34

35  
36 *Rather less than I used to*  
37

38  
39 *From time to time, but not too often*  
40

41  
42 *Definitely less than I used to*  
43

44  
45 *Only occasionally*  
46

47  
48 *Hardly at all*  
49

50  
51 6.  
52

53  
54 13.  
55

56  
57 *I feel cheerful:*  
58  
59  
60

1  
2  
3  
4  
5  
6  
7  
8  
9  
10  
11  
12  
13  
14  
15  
16  
17  
18  
19  
20  
21  
22  
23  
24  
25  
26  
27  
28  
29  
30  
31  
32  
33  
34  
35  
36  
37  
38  
39  
40  
41  
42  
43  
44  
45  
46  
47  
48  
49  
50  
51  
52  
53  
54  
55  
56  
57  
58  
59  
60

*I get sudden feelings of panic:*

*Not at all*

*Very often indeed*

*Not often*

*Quite often*

*Sometimes*

*Not very often*

*Most of the time*

*Not at all*

7.

14.

*I can sit at ease and feel relaxed:*

*I can enjoy a good book or radio or TV  
program:*

*Definitely*

*Often*

*Usually*

*Sometimes*

*Not Often*

For peer review only

1  
2  
3  
4  
5 *Not often*  
6  
7

8 *Not at all*  
9

10  
11 *Very seldom*  
12  
13  
14

15 *Qx . I experience a general sense of emptiness*

- 16  
17
  - *Not ever*
  - *Rarely*
  - *Sometimes*
  - *Often*18  
19  
20

21 *Qy. There are plenty of people I can rely on when I have problems*

- 22  
23
  - *Not ever*
  - *Rarely*
  - *Sometimes*
  - *Often*24  
25  
26  
27  
28

29 *Qz. I miss having people around me*

- 30  
31
  - *Not ever*
  - *Rarely*
  - *Sometimes*
  - *Often*32  
33  
34  
35  
36

37 *Please check you have answered all the questions above.*

38 *b) For each of the 17 mood questions above, please also indicate if you are*  
39 *feeling or experiencing this 1, less than; 2, the same as; or 3, more than before*  
40 *social isolation was implemented.*  
41  
42  
43

44 *<1> [1 or 2 or 3]*

45 *<2> [1 or 2 or 3]*

46 *<3> [1 or 2 or 3]*

47 *<4> [1 or 2 or 3]*

48  
49  
50  
51 *<5> [1 or 2 or 3]*

52 *<6> [1 or 2 or 3]*

53 *<7> [1 or 2 or 3]*

54 *<8> [1 or 2 or 3]*

55 *<9> [1 or 2 or 3]*

56  
57  
58  
59 *<10> [1 or 2 or 3]*  
60

1  
2  
3 <11> [1 or 2 or 3]

4 <12> [1 or 2 or 3]

5 <13> [1 or 2 or 3]

6 <14> [1 or 2 or 3]

7 <15> [1 or 2 or 3]

8 <16> [1 or 2 or 3]

9 <17> [1 or 2 or 3]

10  
11  
12  
13  
14  
15  
16  
17 *Q. People may have worries about Covid-19. Have you been worried about any of*  
18 *the following and, if so, how much?*

19  
20  
21 *Not at all*

22 *Little*

23 *Some*

24  
25 *Rather*  
26 *much*

27  
28 *Very*  
29 *much*

30 *Getting Covid-19 infection and/or infecting*  
31 *someone else*

32  
33  
34  
35  
36  
37  
38  
39  
40 *That a person close to me could get infected*  
41 *with Covid-19*

42  
43  
44  
45  
46  
47  
48  
49  
50 *Being discriminated against or avoided*  
51 *because of Covid-19*

52  
53  
54  
55  
56  
57  
58  
59  
60 *Impact of the Covid-19 epidemic on my own*

economy and/or loss of my employment

*Economic impact of the Covid-19 epidemic on the global economy*

*The government's and/or health system's lack of ability to handle the Covid-19 pandemic situation, including the shortage of food and other groceries*

*Imperial College Sleep Quality (ICSQ) Questionnaire*

*Instructions:*

*The following questions relate to your usual sleep habits for a period of one month before and during a period of reduced social contact. Your answers should indicate the most accurate reply for the majority of days and nights during these periods.*

*Please answer all questions.*

*1. During the period before reduced social contact, what time did you usually go to bed at night: bed-time was .....*

*1b) During the period of reduced social contact, what time have you usually gone to bed at night: bed-time is - .....*

*2. During the period before reduced social contact, how long (in minutes) did it usually take you to fall asleep each night: number of minutes - .....*

*2b) During the period of reduced social contact, how long (in minutes) has it usually taken you to fall asleep each night: number of minutes - .....*

*3. During the period before reduced social contact, what time did you usually get up in the morning: getting-up time was - .....*

*3b) During the period of reduced social contact, what time do you usually get up in the morning: getting-up time is - .....*

*4. During the period before reduced social contact, how many hours of actual sleep did you get at night? (This may be different from the number of hours you*

1  
2  
3 spent in bed): hours of sleep per night - .....

4 4b) During the period of reduced social contact, how many hours of actual sleep do  
5 you get at night? (This may be different from the number of hours you spend in bed):  
6 hours of sleep per night - .....

7  
8 5. During the period before reduced social contact, how often did you have trouble  
9 sleeping because you could not get to sleep within 30 minutes:

10 o Not ever

11 o Less than once a week

12 o Once or twice a week

13 o Three or more times a week

14  
15  
16  
17 5b) During the period of reduced social contact, how often have you had trouble  
18 sleeping because you could not get to sleep within 30 minutes:

19 o Not ever

20 o Less than once a week

21 o Once or twice a week

22 o Three or more times a week

23  
24  
25 6. During the period before reduced social contact, did you experience poor sleep  
26 (restless and unable to sleep):

27 o Not ever

28 o Less than once a week

29 o Once or twice a week

30 o Three or more times a week

31  
32  
33 6b) During the period of reduced social contact, have you experienced poor sleep  
34 (restless and unable to sleep):

35 o Not ever

36 o Less than once a week

37 o Once or twice a week

38 o Three or more times a week

39  
40  
41  
42 7a) During the period before reduced social contact, did you experience loneliness  
43 (felt isolated, with no companions):

44 o Not ever

45 o Rarely

46 o Sometimes

47 o Often

48  
49  
50  
51 7b) During the period of reduced social contact, have you experienced loneliness  
52 (felt isolated, with no companions):

53 o Not ever

54 o Rarely

55 o Sometimes

56 o Often

57  
58  
59 7c) During the period of reduced social contact, have you experienced loneliness: 1,  
60

less than; 2, the same as; or 3, more than before social isolation was implemented

Select: [1 or 2 or 3]

### Functional Activities Questionnaire

For each of the tasks below please rate your ability to carry out the task/activity independently on the following scale:

1. I had no difficulty

2. I had some difficulty, but I completed the task/activity myself.

3. I need some assistance to complete the task/activity:

a) I did not need assistance prior to COVID-19 lockdown but need assistance now to maintain social isolation/distancing

b) I could do the task/activity before the COVID-19 lockdown, but now would need assistance even if it were not to maintain social distancing

c) I required assistance since before the COVID-19 lockdown

4. I needed others to do this for me,

a) I could do the task/activity myself or with assistance prior to COVID-19 lockdown but need others to do it for me to maintain social isolation/distancing

b) I could do the task/activity myself or with assistance before the COVID-19 lockdown, but now would need others to do it for me even if it were not to maintain social distancing

c) I required others to do it for me since before the COVID-19 lockdown

5. I am unsure if I require assistance (e.g., never did the task/activity or have not done the task/activity over the past week)

Activities:

1. Writing cheques, paying bills, balancing cheque book, using an ATM cash machine

Response: .....

2. Assembling tax records, business affairs, or papers

Response: .....

3. Shopping alone for household necessities, medicines or groceries

Response: .....

4. Playing a game of skill, working on a hobby

Response: .....

5. Heating water, making a cup of coffee, turning off stove after use

Response: .....



1  
2  
3  
4  
5  
6  
7  
8  
9  
10  
11  
12  
13  
14  
15  
16  
17  
18  
19  
20  
21  
22  
23  
24  
25  
26  
27  
28  
29  
30  
31  
32  
33  
34  
35  
36  
37  
38  
39  
40  
41  
42  
43  
44  
45  
46  
47  
48  
49  
50  
51  
52  
53  
54  
55  
56  
57  
58  
59  
60

6. *Preparing a balanced meal*

Response: .....

7. *Keeping track of current events*

Response: .....

8. *Paying attention to, understanding, discussing TV, video, book, magazine*

Response: .....

9. *Remembering appointments, family occasions, public holidays, to take medications*

Response: .....

10. *Travelling out of my neighbourhood by taxi, car, bus or train and making travel arrangements.*

Response: .....

**THANK YOU FOR COMPLETING THIS QUESTIONNAIRE. YOUR RESPONSES HAVE BEEN SAVED AND SENT TO THE STUDY TEAM.**

*NHS health advice and information regarding the novel coronavirus can be found here: <https://www.nhs.uk/conditions/coronavirus-covid-19/>*

*For Advice on Mental health we suggest using these links:*

1. *The NHS Every Mind Matters website has information on how to look after your mental wellbeing while in isolation: <https://www.nhs.uk/oneyou/every-mind-matters/>*

2. *The charity Mental Health UK have advice on managing mental health during the coronavirus outbreak: <https://mentalhealth-uk.org/help-and-information/covid-19-and-your-mental-health/>*

3. *The NHS recommends a range of mobile apps to help with mental wellbeing, many of which are free to download: <https://www.nhs.uk/apps-library/category/mental-health/>*

4. *If you need someone to talk to about your mental health, the charity Samaritans have a helpline available 24 hours a day, 7 days a week:*

a. *Call: 116 123*

b. *or visit: <https://www.samaritans.org/how-we-can-help/contact-samaritan/>*

*For Advice on Physical activity we suggest using these links:*

1. *The NHS Live Well website has a range of free advice and programmes from light activity to more strenuous exercises for those aged under 65: <https://www.nhs.uk/live-well/exercise/>*

2. *The NHS Live Well website has a range of free advice and programmes from light activity to more strenuous exercises for those aged 65 or older: <https://www.nhs.uk/live-well/exercise/physical-activity-guidelines-older-adults/>*

3. *Tips, advice and guidance from Sport England on how to keep or get active in and around your home: <https://www.sportengland.org/stayinworkout>*

1  
2  
3  
4 4. *Stay Active at Home: a simple set of exercises designed for older people to*  
5 *stay active at home:* [https://www.csp.org.uk/public-patient/keeping-active-and-](https://www.csp.org.uk/public-patient/keeping-active-and-healthy/staying-healthy-you-age/staying-strong-you-age/strength)  
6 [healthy/staying-healthy-you-age/staying-strong-you-age/strength](https://www.csp.org.uk/public-patient/keeping-active-and-healthy/staying-healthy-you-age/staying-strong-you-age/strength)  
7

8 For Advice on Sleep we suggest using these links:  
9

10 1. *The NHS ten top tips to improve sleep:* [https://www.nhs.uk/live-well/sleep-and-](https://www.nhs.uk/live-well/sleep-and-tiredness/10-tips-to-beat-insomnia/)  
11 [tiredness/10-tips-to-beat-insomnia/](https://www.nhs.uk/live-well/sleep-and-tiredness/10-tips-to-beat-insomnia/)

12 2. *The NHS recommends a range of mobile apps to help with sleep:*  
13 <https://www.nhs.uk/apps-library/category/sleep/>  
14  
15  
16  
17

18  
19 Supplementary Table 1: CCRR survey  
20  
21  
22  
23  
24  
25  
26  
27  
28  
29  
30  
31  
32  
33  
34  
35  
36  
37  
38  
39  
40  
41  
42  
43  
44  
45  
46  
47  
48  
49  
50  
51  
52  
53  
54  
55  
56  
57  
58  
59  
60

## Supplementary file 2

### Supplementary methods

#### Metabolic Equivalent of Task (MET) calculation

Briefly, 1 MET equates to an individual's resting energy expenditure. According to the IPAQ scoring protocol, 3.3 METS is considered equivalent to walking, and moderate and vigorous activity to be 4 and 8 METS, respectively. To calculate the continuous variable of total MET minutes a week, the self-reported duration (minutes) and frequency (days) of each of these PA categories is multiplied by the by the specified metric.

#### Supplementary figures and tables

Figure 1: Box-plot of distribution of MET minutes per week before and during lockdown for 6,219 participants with completed IPAQ data

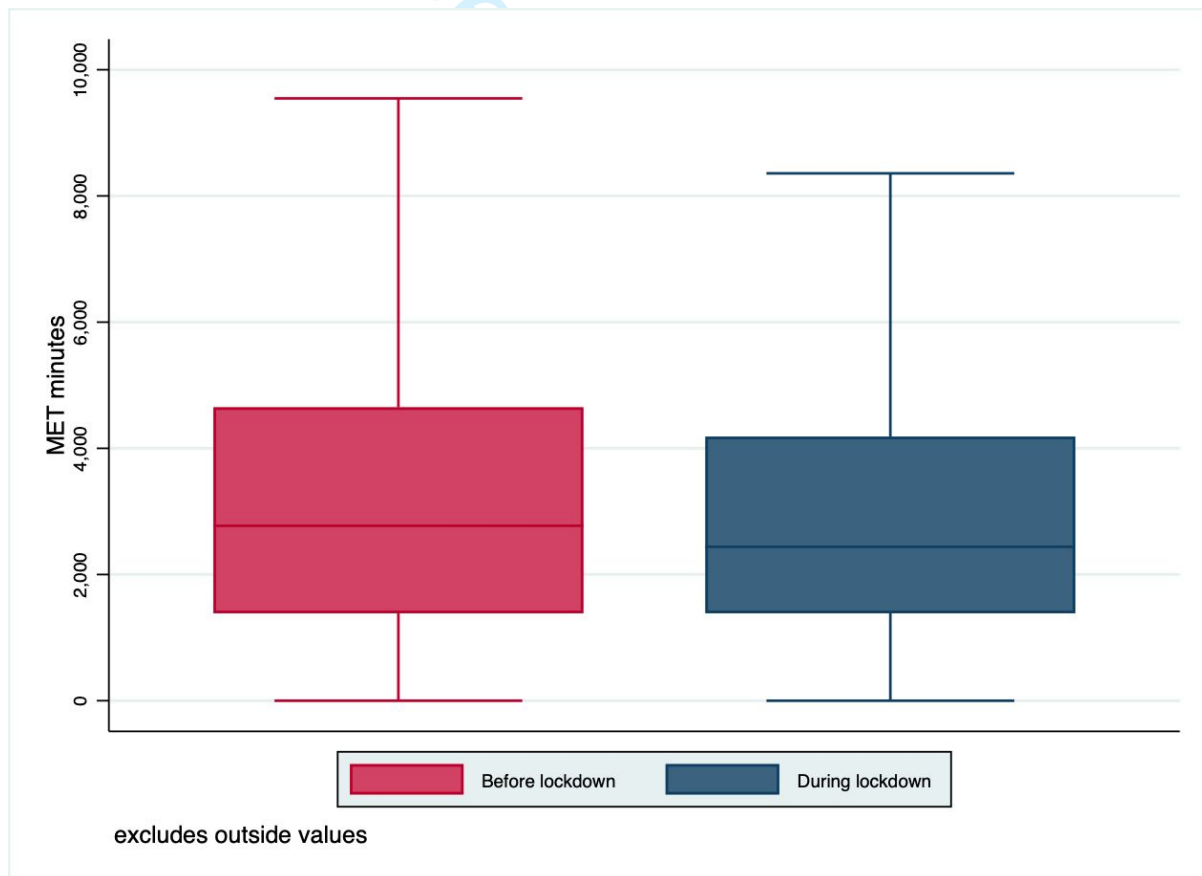

Figure 2: Box-plot of distribution of MET minutes per week after introduction of lockdown by month of survey completion for 6,219 participants with completed IPAQ data

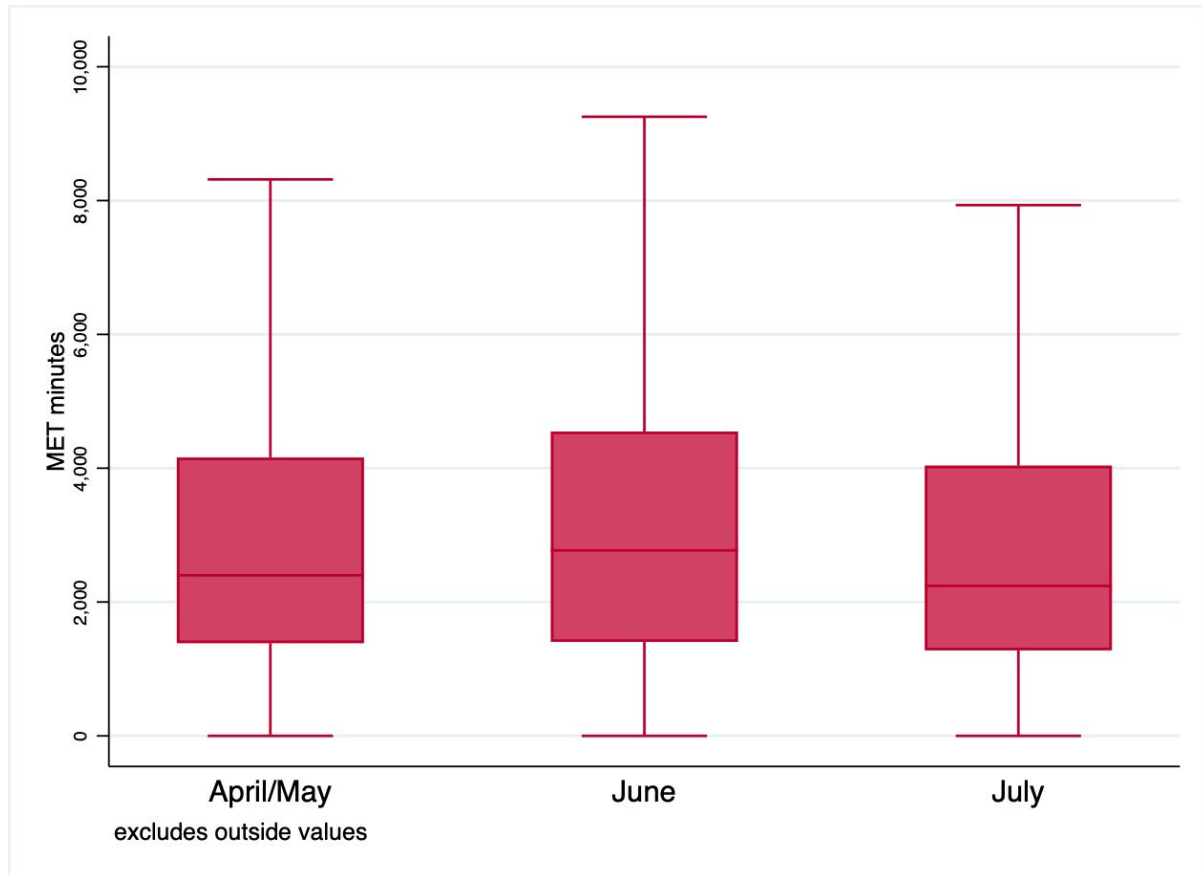

Table 1: Mean MET minutes after introduction of lockdown measures by month of survey completion

| Month      | Total | Percent | Mean MET minutes | p value <sup>¶</sup> |
|------------|-------|---------|------------------|----------------------|
| April/May* | 4975  | 80.0%   | 3139             | 0.0007               |
| June       | 994   | 16.0%   | 3470             |                      |
| July       | 250   | 4.0%    | 2967             |                      |

\* April (110) and May (4865) combined due to small numbers completed in April

<sup>¶</sup> p-value from linear regression models of MET minutes as dependent variable, against survey completion month as explanatory variable.

Figure 3: Box-plot of distribution of MET minutes per week before introduction of lockdown by month of survey completion for 6,219 participants with completed IPAQ data

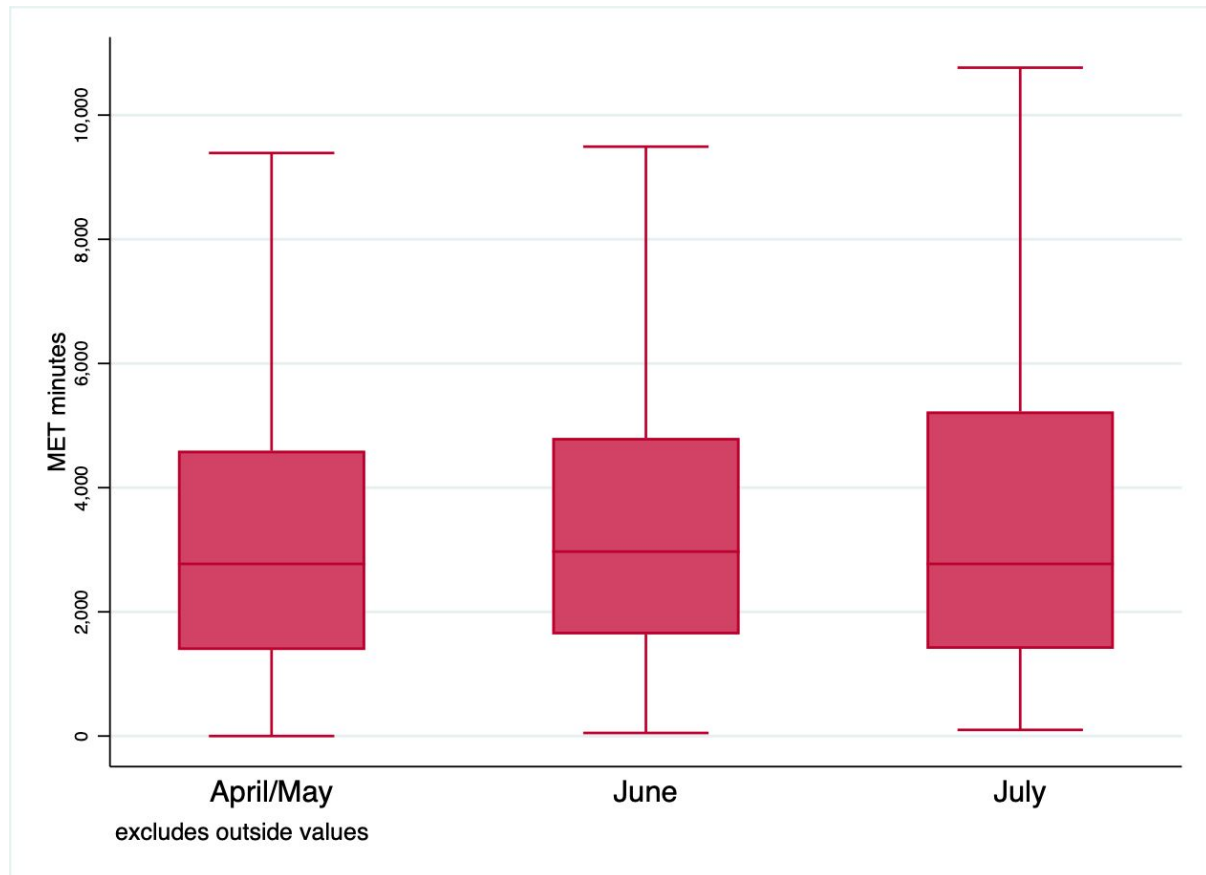

Linear regression models of MET minutes as dependent variable, against survey completion month as explanatory variable showed no significant association ( $p=0.1112$ ).

Figure 4: Causal diagram representing factors impacting on change in physical activity after lockdown

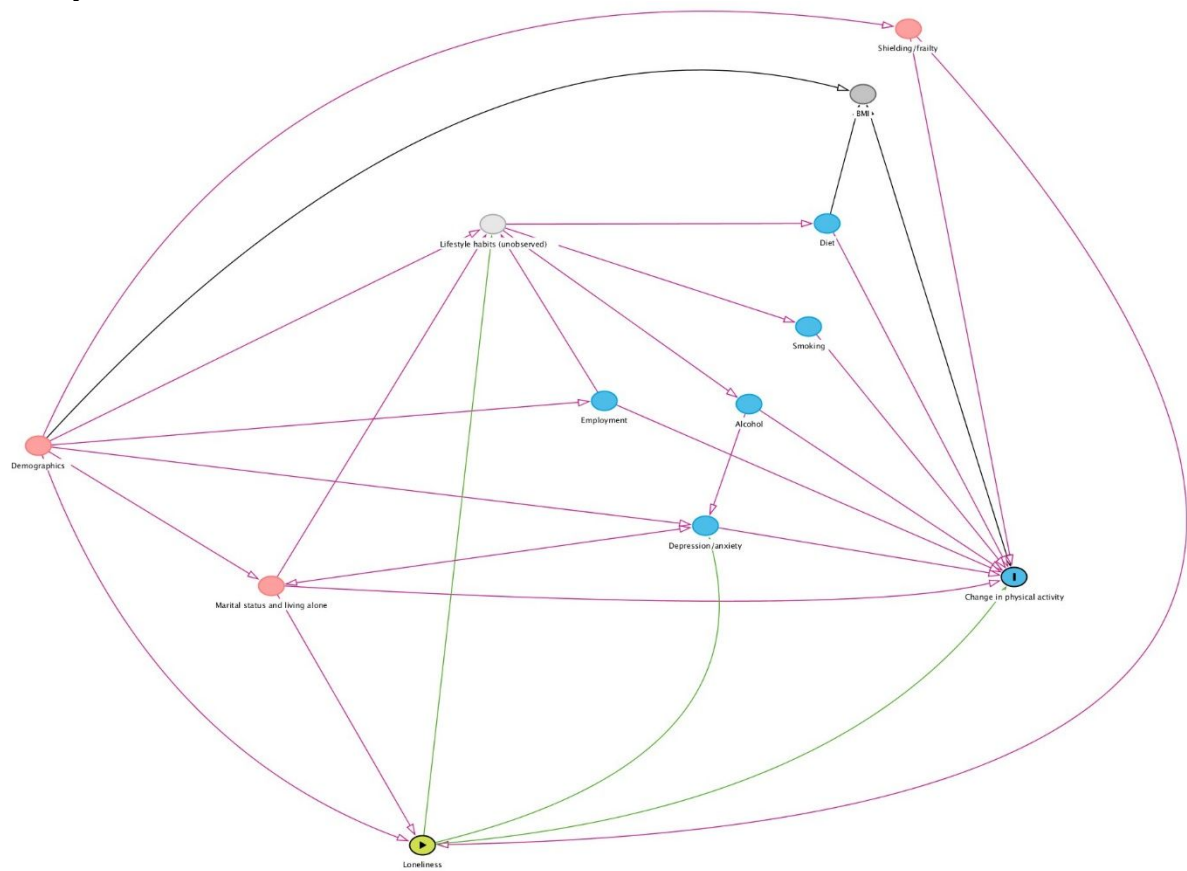

view only

Table 2: Unadjusted associations in physical activity (MET minutes per week) after introduction of lockdown measures and change from before lockdown, from linear regression models. Note: negative values for change in activity indicate reduction after lockdown

| Predictor                             | Physical activity after lockdown (MET minutes/week) |                         |       |         | Change in physical activity from before lockdown (MET minutes/week) |                         |       |         |
|---------------------------------------|-----------------------------------------------------|-------------------------|-------|---------|---------------------------------------------------------------------|-------------------------|-------|---------|
|                                       | Mean                                                | 95% confidence interval |       | p value | Mean                                                                | 95% confidence interval |       | p value |
|                                       |                                                     | Lower                   | Upper |         |                                                                     | Lower                   | Upper |         |
| <b>Mean (whole cohort)</b>            | 3186                                                | 3120                    | 3253  | -       | -333                                                                | -396                    | -271  | -       |
| <b>Age (years)</b>                    |                                                     |                         |       |         |                                                                     |                         |       |         |
| 50-64                                 | 3341                                                | 3191                    | 3491  |         | -196                                                                | -338                    | -55   |         |
| 65-74                                 | 3201                                                | 3112                    | 3290  | <0.001  | -362                                                                | -446                    | -278  | 0.184   |
| 75-84                                 | 3092                                                | 2952                    | 3232  |         | -365                                                                | -497                    | -233  |         |
| 85+                                   | 2326                                                | 1863                    | 2790  |         | -503                                                                | -940                    | -66   |         |
| <b>Sex</b>                            |                                                     |                         |       |         |                                                                     |                         |       |         |
| Female                                | 3227                                                | 3138                    | 3317  | 0.180   | -450                                                                | -533                    | -366  | <0.001  |
| Male                                  | 3136                                                | 3036                    | 3235  |         | -189                                                                | -282                    | -95   |         |
| <b>Ethnicity</b>                      |                                                     |                         |       |         |                                                                     |                         |       |         |
| White                                 | 3196                                                | 3127                    | 3265  |         | -330                                                                | -394                    | -265  |         |
| Mixed/multiple ethnic groups          | 3346                                                | 2819                    | 3873  | 0.425   | -392                                                                | -887                    | 102   | 0.641   |
| Asian/Asian British                   | 2929                                                | 2530                    | 3327  |         | -326                                                                | -700                    | 48    |         |
| Black/African/Caribbean/Black British | 3351                                                | 2551                    | 4151  |         | 4                                                                   | -746                    | 754   |         |
| Other ethnic group                    | 2754                                                | 2099                    | 3410  |         | -740                                                                | -1355                   | -125  |         |
| <b>Body Mass Index category</b>       |                                                     |                         |       |         |                                                                     |                         |       |         |
| Underweight                           | 3815                                                | 3137                    | 4493  |         | -21                                                                 | -649                    | 607   |         |
| Healthy weight                        | 3569                                                | 3439                    | 3700  | <0.001  | -126                                                                | -247                    | -5    | 0.055   |
| Overweight                            | 3130                                                | 2959                    | 3300  |         | -363                                                                | -521                    | -204  |         |
| Obese                                 | 2590                                                | 2309                    | 2870  |         | -400                                                                | -659                    | -140  |         |

|                               |      |      |      |        |      |       |      |        |
|-------------------------------|------|------|------|--------|------|-------|------|--------|
| <b>Employment status</b>      |      |      |      |        |      |       |      |        |
| Employed                      | 3093 | 2950 | 3236 |        | -217 | -351  | -84  |        |
| Furloughed                    | 3496 | 3122 | 3870 | 0.118  | -488 | -838  | -139 | 0.101  |
| Unemployed                    | 3463 | 3031 | 3894 |        | -672 | -1076 | -268 |        |
| Retired                       | 3191 | 3111 | 3271 |        | -334 | -409  | -259 |        |
| <b>Marital status</b>         |      |      |      |        |      |       |      |        |
| Divorced/single/widowed       | 3026 | 2908 | 3143 | 0.001  | -540 | -650  | -430 | <0.001 |
| Living with a partner/married | 3262 | 3181 | 3342 |        | -236 | -312  | -161 |        |
| <b>Household</b>              |      |      |      |        |      |       |      |        |
| Not living alone              | 3262 | 3185 | 3340 | <0.001 | -240 | -313  | -168 | <0.001 |
| Living alone                  | 2983 | 2855 | 3110 |        | -582 | -702  | -463 |        |
| <b>Loneliness</b>             |      |      |      |        |      |       |      |        |
| Not ever                      | 3284 | 3188 | 3380 |        | -216 | -306  | -126 |        |
| Rarely                        | 3087 | 2951 | 3224 | 0.024  | -360 | -488  | -232 | <0.001 |
| Sometimes                     | 3155 | 3010 | 3300 |        | -481 | -617  | -345 |        |
| Often                         | 2938 | 2666 | 3210 |        | -762 | -1018 | -507 |        |
| <b>Shielding</b>              |      |      |      |        |      |       |      |        |
| Not shielding                 | 3273 | 3196 | 3350 | <0.001 | -243 | -315  | -171 | <0.001 |
| Shielding                     | 2942 | 2812 | 3072 |        | -588 | -710  | -466 |        |
| <b>Frailty</b>                |      |      |      |        |      |       |      |        |
| Robust                        | 3257 | 3183 | 3330 |        | -335 | -404  | -265 |        |
| Pre-frail                     | 2903 | 2746 | 3059 | <0.001 | -328 | -475  | -180 | 0.389  |
| Frail                         | 1952 | 1055 | 2849 |        | -925 | -1768 | -82  |        |
| <b>Alcohol drinker</b>        |      |      |      |        |      |       |      |        |
| No                            | 3044 | 2884 | 3203 | 0.054  | -485 | -634  | -335 | 0.029  |
| Yes                           | 3217 | 3143 | 3290 |        | -301 | -370  | -233 |        |
| <b>Smoker</b>                 |      |      |      |        |      |       |      |        |
| No                            | 3202 | 3135 | 3270 | 0.010  | -322 | -385  | -259 | 0.046  |
| Yes                           | 2696 | 2318 | 3074 |        | -689 | -1043 | -334 |        |



|                                                             |      |      |      |        |       |       |      |        |
|-------------------------------------------------------------|------|------|------|--------|-------|-------|------|--------|
| <b>Diet</b>                                                 |      |      |      |        |       |       |      |        |
| No change from usual - already had a healthy diet           | 3257 | 3183 | 3331 |        | -333  | -402  | -263 |        |
| My diet has become more healthy                             | 3314 | 3119 | 3509 | <0.001 | -55   | -238  | 129  | <0.001 |
| My diet was healthy before but has got worse since lockdown | 2523 | 2227 | 2818 |        | -890  | -1168 | -612 |        |
| No change from usual - my diet isn't very healthy           | 2009 | 1641 | 2377 |        | -479  | -825  | -133 |        |
| <b>HADS (depression score)</b>                              |      |      |      |        |       |       |      |        |
| Normal (0-7)                                                | 3195 | 3119 | 3270 | <0.001 | -293  | -365  | -222 | <0.001 |
| Borderline (8-10)                                           | 2787 | 2495 | 3079 |        | -676  | -953  | -399 |        |
| Abnormal (11-21)                                            | 2450 | 1971 | 2929 |        | -1450 | -1904 | -997 |        |
| <b>HADS (anxiety score)</b>                                 |      |      |      |        |       |       |      |        |
| Normal (0-7)                                                | 3123 | 3044 | 3201 | 0.150  | -312  | -386  | -237 | 0.004  |
| Borderline (8-10)                                           | 3343 | 3109 | 3577 |        | -348  | -570  | -125 |        |
| Abnormal (11-21)                                            | 3288 | 2971 | 3605 |        | -836  | -1137 | -535 |        |

\*HADS – Hospital Anxiety and Depression Score

Table 3: Results of multivariable linear regression models of physical activity after lockdown, adjusted for age, sex, ethnicity, month of survey completion and baseline physical activity. Data presented as mean MET minutes/week +/- 95% confidence interval compared to the reference group, with negative values indicating lower physical activity than the reference.

| Predictor                             | Physical activity after lockdown (MET minutes/week) | 95% confidence interval |       | p value | Number of observations |
|---------------------------------------|-----------------------------------------------------|-------------------------|-------|---------|------------------------|
|                                       |                                                     | Lower                   | Upper |         |                        |
| <b>Age (years)</b>                    |                                                     |                         |       |         |                        |
| 50-64 (reference)                     | -                                                   | -                       | -     |         |                        |
| 65-74                                 | -154                                                | -296                    | -12   | <0.001  | 6155                   |
| 75-84                                 | -213                                                | -380                    | -46   |         |                        |
| 85+                                   | -640                                                | -1034                   | -246  |         |                        |
| <b>Sex</b>                            |                                                     |                         |       |         |                        |
| Female (reference)                    | -                                                   | -                       | -     | 0.053   | 6155                   |
| Male                                  | 108                                                 | -1                      | 216   |         |                        |
| <b>Ethnicity</b>                      |                                                     |                         |       |         |                        |
| White (reference)                     | -                                                   | -                       | -     |         |                        |
| Mixed/multiple ethnic groups          | -14                                                 | -442                    | 415   | 0.517   | 6155                   |
| Asian/Asian British                   | -136                                                | -463                    | 191   |         |                        |
| Black/African/Caribbean/Black British | 248                                                 | -398                    | 894   |         |                        |
| Other ethnic group                    | -435                                                | -969                    | 100   |         |                        |
| <b>Body Mass Index category</b>       |                                                     |                         |       |         |                        |
| Underweight                           | 153                                                 | -411                    | 717   |         |                        |
| Healthy weight (reference)            | -                                                   | -                       | -     | 0.030   | 2987                   |
| Overweight                            | -341                                                | -518                    | -165  |         |                        |
| Obese                                 | -578                                                | -832                    | -324  |         |                        |
| <b>Employment status</b>              |                                                     |                         |       |         |                        |
| Employed (reference)                  | -                                                   | -                       | -     | 0.905   | 5958                   |
| Furloughed                            | 47                                                  | -278                    | 372   |         |                        |
| Unemployed                            | -110                                                | -480                    | 259   |         |                        |

1  
2  
3  
4  
5  
6  
7  
8  
9  
10  
11  
12  
13  
14  
15  
16  
17  
18  
19  
20  
21  
22  
23  
24  
25  
26  
27  
28  
29  
30  
31  
32  
33  
34  
35  
36  
37  
38  
39  
40  
41  
42  
43  
44  
45  
46

|                                                               |      |       |      |        |      |
|---------------------------------------------------------------|------|-------|------|--------|------|
| Retired                                                       | 99   | -48   | 246  |        |      |
| <b>Marital status</b>                                         |      |       |      |        |      |
| Divorced/single/widowed (reference)                           | -    | -     | -    | <0.001 | 6155 |
| Living with a partner/married                                 | 240  | 120   | 360  |        |      |
| <b>Household</b>                                              |      |       |      |        |      |
| Not living alone (reference)                                  | -    | -     | -    | <0.001 | 6155 |
| Living alone                                                  | -277 | -402  | -152 |        |      |
| <b>Loneliness</b>                                             |      |       |      |        |      |
| Not ever (reference)                                          | -    | -     | -    |        |      |
| Rarely                                                        | -161 | -297  | -25  | <0.001 | 6077 |
| Sometimes                                                     | -186 | -329  | -42  |        |      |
| Often                                                         | -452 | -688  | -217 |        |      |
| <b>Shielding</b>                                              |      |       |      |        |      |
| Not shielding (reference)                                     | -    | -     | -    | <0.001 | 6155 |
| Shielding                                                     | -290 | -417  | -163 |        |      |
| <b>Frailty</b>                                                |      |       |      |        |      |
| Robust (reference)                                            | -    | -     | -    | 0.005  | 6142 |
| Pre-frail                                                     | -160 | -301  | -19  |        |      |
| Frail                                                         | -926 | -1663 | -189 |        |      |
| <b>Alcohol drinker</b>                                        |      |       |      |        |      |
| No (reference)                                                | -    | -     | -    | 0.049  | 6155 |
| Yes                                                           | 145  | 1     | 289  |        |      |
| <b>Smoker</b>                                                 |      |       |      |        |      |
| No (reference)                                                | -    | -     | -    | 0.005  | 6155 |
| Yes                                                           | -451 | -762  | -140 |        |      |
| <b>Diet</b>                                                   |      |       |      |        |      |
| No change from usual - already had a healthy diet (reference) | -    | -     | -    |        |      |
| My diet has become more healthy                               | 156  | -13   | 326  | <0.001 | 6155 |
| My diet was healthy before but has got worse since lockdown   | -662 | -910  | -414 |        |      |

|                                                   |       |       |      |        |      |
|---------------------------------------------------|-------|-------|------|--------|------|
| No change from usual - my diet isn't very healthy | -667  | -975  | -359 |        |      |
| <b>HADS (depression score)</b>                    |       |       |      |        |      |
| Normal (0-7) (reference)                          | -     | -     | -    |        |      |
| Borderline (8-10)                                 | -408  | -654  | -163 | <0.001 | 5038 |
| Abnormal (11-21)                                  | -1007 | -1401 | -612 |        |      |
| <b>HADS (anxiety score)</b>                       |       |       |      |        |      |
| Normal (0-7) (reference)                          | -     | -     | -    |        |      |
| Borderline (8-10)                                 | 94    | -109  | 296  | 0.478  | 5038 |
| Abnormal (11-21)                                  | -220  | -486  | 47   |        |      |

HADS – Hospital Anxiety and Depression Score

1  
2  
3  
4  
5  
6  
7  
8  
9  
10  
11  
12  
13  
14  
15  
16  
17  
18  
19  
20  
21  
22  
23  
24  
25  
26  
27  
28  
29  
30  
31  
32  
33  
34  
35  
36  
37  
38  
39  
40  
41  
42  
43  
44  
45  
46

Table 4: Multivariable linear regression model for physical activity after lockdown with loneliness, adjusted for age, sex, ethnicity, month of survey completion, baseline physical activity, living alone, marital status, shielding and frailty

| Predictor            | Physical activity after lockdown (MET minutes/week) | 95% confidence interval |       | p value | Number of observations |
|----------------------|-----------------------------------------------------|-------------------------|-------|---------|------------------------|
|                      |                                                     | Lower                   | Upper |         |                        |
| <b>Loneliness</b>    |                                                     |                         |       |         |                        |
| Not ever (reference) | -                                                   | -                       | -     | 0.007   | 6077                   |
| Rarely               | -127                                                | -265                    | 11    |         |                        |
| Sometimes            | -107                                                | -256                    | 42    |         |                        |
| Often                | -306                                                | -552                    | -60   |         |                        |

Adjusted: age, sex, ethnicity, month of survey completion, baseline physical activity, living alone, marital status, shielding, frailty

**STROBE 2007 (v4) checklist of items to be included in reports of observational studies in epidemiology\***  
**Checklist for cohort, case-control, and cross-sectional studies (combined)**

| Section/Topic             | Item # | Recommendation                                                                                                                                                                                                                                                                                                                                                                                                                                                         | Reported on page # |
|---------------------------|--------|------------------------------------------------------------------------------------------------------------------------------------------------------------------------------------------------------------------------------------------------------------------------------------------------------------------------------------------------------------------------------------------------------------------------------------------------------------------------|--------------------|
| Title and abstract        | 1      | (a) Indicate the study's design with a commonly used term in the title or the abstract                                                                                                                                                                                                                                                                                                                                                                                 | 1                  |
|                           |        | (b) Provide in the abstract an informative and balanced summary of what was done and what was found                                                                                                                                                                                                                                                                                                                                                                    | 4                  |
| <b>Introduction</b>       |        |                                                                                                                                                                                                                                                                                                                                                                                                                                                                        |                    |
| Background/rationale      | 2      | Explain the scientific background and rationale for the investigation being reported                                                                                                                                                                                                                                                                                                                                                                                   | 5                  |
| Objectives                | 3      | State specific objectives, including any pre-specified hypotheses                                                                                                                                                                                                                                                                                                                                                                                                      | 5                  |
| <b>Methods</b>            |        |                                                                                                                                                                                                                                                                                                                                                                                                                                                                        |                    |
| Study design              | 4      | Present key elements of study design early in the paper                                                                                                                                                                                                                                                                                                                                                                                                                | 5                  |
| Setting                   | 5      | Describe the setting, locations, and relevant dates, including periods of recruitment, exposure, follow-up, and data collection                                                                                                                                                                                                                                                                                                                                        | 5-6                |
| Participants              | 6      | (a) <i>Cohort study</i> —Give the eligibility criteria, and the sources and methods of selection of participants. Describe methods of follow-up<br><i>Case-control study</i> —Give the eligibility criteria, and the sources and methods of case ascertainment and control selection. Give the rationale for the choice of cases and controls<br><i>Cross-sectional study</i> —Give the eligibility criteria, and the sources and methods of selection of participants | 5-6                |
|                           |        | (b) <i>Cohort study</i> —For matched studies, give matching criteria and number of exposed and unexposed<br><i>Case-control study</i> —For matched studies, give matching criteria and the number of controls per case                                                                                                                                                                                                                                                 |                    |
| Variables                 | 7      | Clearly define all outcomes, exposures, predictors, potential confounders, and effect modifiers. Give diagnostic criteria, if applicable                                                                                                                                                                                                                                                                                                                               | 6                  |
| Data sources/ measurement | 8*     | For each variable of interest, give sources of data and details of methods of assessment (measurement). Describe comparability of assessment methods if there is more than one group                                                                                                                                                                                                                                                                                   | 6-7                |
| Bias                      | 9      | Describe any efforts to address potential sources of bias                                                                                                                                                                                                                                                                                                                                                                                                              | 6-7                |
| Study size                | 10     | Explain how the study size was arrived at                                                                                                                                                                                                                                                                                                                                                                                                                              | 6                  |
| Quantitative variables    | 11     | Explain how quantitative variables were handled in the analyses. If applicable, describe which groupings were chosen and why                                                                                                                                                                                                                                                                                                                                           | 6-7                |
| Statistical methods       | 12     | (a) Describe all statistical methods, including those used to control for confounding                                                                                                                                                                                                                                                                                                                                                                                  | 6-7                |
|                           |        | (b) Describe any methods used to examine subgroups and interactions                                                                                                                                                                                                                                                                                                                                                                                                    | 6-7                |
|                           |        | (c) Explain how missing data were addressed                                                                                                                                                                                                                                                                                                                                                                                                                            | 6-7                |
|                           |        | (d) <i>Cohort study</i> —If applicable, explain how loss to follow-up was addressed<br><i>Case-control study</i> —If applicable, explain how matching of cases and controls was addressed                                                                                                                                                                                                                                                                              | NA                 |

|                          |     |                                                                                                                                                                                                              |                       |
|--------------------------|-----|--------------------------------------------------------------------------------------------------------------------------------------------------------------------------------------------------------------|-----------------------|
|                          |     | <i>Cross-sectional study</i> —If applicable, describe analytical methods taking account of sampling strategy                                                                                                 |                       |
|                          |     | (e) Describe any sensitivity analyses                                                                                                                                                                        | NA                    |
| <b>Results</b>           |     |                                                                                                                                                                                                              |                       |
| Participants             | 13* | (a) Report numbers of individuals at each stage of study—eg numbers potentially eligible, examined for eligibility, confirmed eligible, included in the study, completing follow-up, and analysed            | 6                     |
|                          |     | (b) Give reasons for non-participation at each stage                                                                                                                                                         | NA                    |
|                          |     | (c) Consider use of a flow diagram                                                                                                                                                                           | NA                    |
| Descriptive data         | 14* | (a) Give characteristics of study participants (eg demographic, clinical, social) and information on exposures and potential confounders                                                                     | 7                     |
|                          |     | (b) Indicate number of participants with missing data for each variable of interest                                                                                                                          | Table 1               |
|                          |     | (c) <i>Cohort study</i> —Summarise follow-up time (eg, average and total amount)                                                                                                                             | NA: baseline analysis |
| Outcome data             | 15* | <i>Cohort study</i> —Report numbers of outcome events or summary measures over time                                                                                                                          | NA: baseline analysis |
|                          |     | <i>Case-control study</i> —Report numbers in each exposure category, or summary measures of exposure                                                                                                         |                       |
|                          |     | <i>Cross-sectional study</i> —Report numbers of outcome events or summary measures                                                                                                                           |                       |
| Main results             | 16  | (a) Give unadjusted estimates and, if applicable, confounder-adjusted estimates and their precision (eg, 95% confidence interval). Make clear which confounders were adjusted for and why they were included | 7-9                   |
|                          |     | (b) Report category boundaries when continuous variables were categorized                                                                                                                                    | 7-9                   |
|                          |     | (c) If relevant, consider translating estimates of relative risk into absolute risk for a meaningful time period                                                                                             | NA                    |
| Other analyses           | 17  | Report other analyses done—eg analyses of subgroups and interactions, and sensitivity analyses                                                                                                               | 7-9                   |
| <b>Discussion</b>        |     |                                                                                                                                                                                                              |                       |
| Key results              | 18  | Summarise key results with reference to study objectives                                                                                                                                                     | 10                    |
| Limitations              | 19  | Discuss limitations of the study, taking into account sources of potential bias or imprecision. Discuss both direction and magnitude of any potential bias                                                   | 12-13                 |
| Interpretation           | 20  | Give a cautious overall interpretation of results considering objectives, limitations, multiplicity of analyses, results from similar studies, and other relevant evidence                                   | 10-12                 |
| Generalisability         | 21  | Discuss the generalisability (external validity) of the study results                                                                                                                                        | 10-12                 |
| <b>Other information</b> |     |                                                                                                                                                                                                              |                       |
| Funding                  | 22  | Give the source of funding and the role of the funders for the present study and, if applicable, for the original study on which the present article is based                                                | 2                     |

\*Give information separately for cases and controls in case-control studies and, if applicable, for exposed and unexposed groups in cohort and cross-sectional studies.  
**Note:** An Explanation and Elaboration article discusses each checklist item and gives methodological background and published examples of transparent reporting. The STROBE checklist is best used in conjunction with this article (freely available on the Web sites of PLoS Medicine at <http://www.plosmedicine.org/>, Annals of Internal Medicine at <http://www.annals.org/>, and Epidemiology at <http://www.epidem.com/>). Information on the STROBE Initiative is available at [www.strobe-statement.org](http://www.strobe-statement.org).

# BMJ Open

## The impact of social restrictions during the COVID-19 pandemic on the physical activity levels of adults aged 50-92 years: a baseline survey of the CHARIOT COVID-19 Rapid Response prospective cohort study

|                                 |                                                                                                                                                                                                                                                                                                                                                                                                                                                                                                                                                                                                                                                                                                                                                                                                                                                                                                                                                                                                                                                                                                                                                                                                                                                                                                                                                                                                                                                                 |
|---------------------------------|-----------------------------------------------------------------------------------------------------------------------------------------------------------------------------------------------------------------------------------------------------------------------------------------------------------------------------------------------------------------------------------------------------------------------------------------------------------------------------------------------------------------------------------------------------------------------------------------------------------------------------------------------------------------------------------------------------------------------------------------------------------------------------------------------------------------------------------------------------------------------------------------------------------------------------------------------------------------------------------------------------------------------------------------------------------------------------------------------------------------------------------------------------------------------------------------------------------------------------------------------------------------------------------------------------------------------------------------------------------------------------------------------------------------------------------------------------------------|
| Journal:                        | <i>BMJ Open</i>                                                                                                                                                                                                                                                                                                                                                                                                                                                                                                                                                                                                                                                                                                                                                                                                                                                                                                                                                                                                                                                                                                                                                                                                                                                                                                                                                                                                                                                 |
| Manuscript ID                   | bmjopen-2021-050680.R1                                                                                                                                                                                                                                                                                                                                                                                                                                                                                                                                                                                                                                                                                                                                                                                                                                                                                                                                                                                                                                                                                                                                                                                                                                                                                                                                                                                                                                          |
| Article Type:                   | Original research                                                                                                                                                                                                                                                                                                                                                                                                                                                                                                                                                                                                                                                                                                                                                                                                                                                                                                                                                                                                                                                                                                                                                                                                                                                                                                                                                                                                                                               |
| Date Submitted by the Author:   | 14-Jul-2021                                                                                                                                                                                                                                                                                                                                                                                                                                                                                                                                                                                                                                                                                                                                                                                                                                                                                                                                                                                                                                                                                                                                                                                                                                                                                                                                                                                                                                                     |
| Complete List of Authors:       | Salman, David; Imperial College London Department of Primary Care and Public Health; Imperial College London, MSk lab, Department of Surgery and Cancer, Faculty of Medicine<br>Beaney, Thomas; Imperial College London, Department of Primary Care and Public Health<br>Robb, Catherine; Imperial College London, Ageing Epidemiology Research Unit (AGE), School of Public Health, Faculty of Medicine<br>de-Jaegar Loots, Celeste; Imperial College London, Ageing Epidemiology Research Unit (AGE), School of Public Health, Faculty of Medicine<br>Giannakopoulou, Parthenia; Imperial College London, Ageing Epidemiology Research Unit (AGE), School of Public Health, Faculty of Medicine<br>Udeh-Momoh, Chinedu ; Imperial College London, Ageing Epidemiology Research Unit (AGE), School of Public Health, Faculty of Medicine<br>Ahmadi-Abhari, Sara ; Imperial College London, Ageing Epidemiology Research Unit (AGE), School of Public Health, Faculty of Medicine<br>Majeed, Azeem; Imperial College London, Department of Primary Care and Public Health; Imperial College Healthcare NHS Trust, Public Health Directorate<br>Middleton, Lefkos; Imperial College London, Ageing Epidemiology Research Unit (AGE), School of Public Health, Faculty of Medicine; Imperial College Healthcare NHS Trust, Public Health Directorate<br>McGregor, Alison; Imperial College London, MSk lab, Department of Surgery and Cancer, Faculty of Medicine |
| <b>Primary Subject Heading</b>: | Sports and exercise medicine                                                                                                                                                                                                                                                                                                                                                                                                                                                                                                                                                                                                                                                                                                                                                                                                                                                                                                                                                                                                                                                                                                                                                                                                                                                                                                                                                                                                                                    |
| Secondary Subject Heading:      | General practice / Family practice, Geriatric medicine, Public health                                                                                                                                                                                                                                                                                                                                                                                                                                                                                                                                                                                                                                                                                                                                                                                                                                                                                                                                                                                                                                                                                                                                                                                                                                                                                                                                                                                           |
| Keywords:                       | COVID-19, PREVENTIVE MEDICINE, PUBLIC HEALTH, SPORTS MEDICINE, GERIATRIC MEDICINE                                                                                                                                                                                                                                                                                                                                                                                                                                                                                                                                                                                                                                                                                                                                                                                                                                                                                                                                                                                                                                                                                                                                                                                                                                                                                                                                                                               |
|                                 |                                                                                                                                                                                                                                                                                                                                                                                                                                                                                                                                                                                                                                                                                                                                                                                                                                                                                                                                                                                                                                                                                                                                                                                                                                                                                                                                                                                                                                                                 |



1  
2  
3  
4  
5  
6  
7  
8  
9  
10  
11  
12  
13  
14  
15  
16  
17  
18  
19  
20  
21  
22  
23  
24  
25  
26  
27  
28  
29  
30  
31  
32  
33  
34  
35  
36  
37  
38  
39  
40  
41  
42  
43  
44  
45  
46  
47  
48  
49  
50  
51  
52  
53  
54  
55  
56  
57  
58  
59  
60

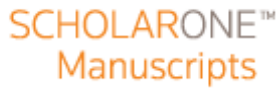



I, the Submitting Author has the right to grant and does grant on behalf of all authors of the Work (as defined in the below author licence), an exclusive licence and/or a non-exclusive licence for contributions from authors who are: i) UK Crown employees; ii) where BMJ has agreed a CC-BY licence shall apply, and/or iii) in accordance with the terms applicable for US Federal Government officers or employees acting as part of their official duties; on a worldwide, perpetual, irrevocable, royalty-free basis to BMJ Publishing Group Ltd ("BMJ") its licensees and where the relevant Journal is co-owned by BMJ to the co-owners of the Journal, to publish the Work in this journal and any other BMJ products and to exploit all rights, as set out in our [licence](#).

The Submitting Author accepts and understands that any supply made under these terms is made by BMJ to the Submitting Author unless you are acting as an employee on behalf of your employer or a postgraduate student of an affiliated institution which is paying any applicable article publishing charge ("APC") for Open Access articles. Where the Submitting Author wishes to make the Work available on an Open Access basis (and intends to pay the relevant APC), the terms of reuse of such Open Access shall be governed by a Creative Commons licence – details of these licences and which [Creative Commons](#) licence will apply to this Work are set out in our licence referred to above.

Other than as permitted in any relevant BMJ Author's Self Archiving Policies, I confirm this Work has not been accepted for publication elsewhere, is not being considered for publication elsewhere and does not duplicate material already published. I confirm all authors consent to publication of this Work and authorise the granting of this licence.

1  
2  
3 **The impact of social restrictions during the COVID-19 pandemic on the physical**  
4 **activity levels of adults aged 50-92 years: a baseline survey of the CHARLOT COVID-19**  
5 **Rapid Response prospective cohort study**  
6

7 **David Salman**, academic clinical fellow in primary care\*<sup>1,2@</sup>, **Thomas Beaney**, academic  
8 clinical fellow in primary care\*<sup>2@</sup>, **Catherine E. Robb**, postgraduate research associate\*<sup>3</sup>,  
9 Celeste A. de Jager Loots, research fellow<sup>3</sup>, Parthenia Giannakopoulou, data management  
10 coordinator<sup>3</sup>, Chi Udeh-Momoh, research programme manager<sup>3</sup>, Sara Ahmadi-Abhari,  
11 lecturer in epidemiology of ageing<sup>3</sup>, Azeem Majeed, chair: primary care and public health<sup>2,4</sup>,  
12 Lefkos T. Middleton, chair: neurology, neuroepidemiology and ageing<sup>3,4</sup>, Alison. H.  
13 McGregor, professor of musculoskeletal biodynamics<sup>1</sup>  
14

15  
16 \*contributed equally as joint lead authors

17 **Author affiliations:**

18  
19 <sup>1</sup>MSk lab, Faculty of Medicine, Imperial College London, UK, W12 0BZ

20  
21 <sup>2</sup>Department of Primary Care and Public Health, Imperial College London, UK, W6 8RP

22  
23 <sup>3</sup>Ageing Epidemiology Research Unit (AGE), School of Public Health, Faculty of Medicine,  
24 Imperial College London, UK

25  
26 <sup>4</sup>Public Health Directorate, Imperial College NHS Healthcare Trust, London, UK

27  
28  
29  
30 **@Correspondence to:**

31 **David Salman**

32  
33 ORCID ID: 0000-0002-1481-8829

34  
35 MSk lab, 2nd Floor, Sir Michael Uren Hub, 86 Wood Lane, London, W12 0BZ

36  
37 Email: [d.salman11@imperial.ac.uk](mailto:d.salman11@imperial.ac.uk)

38  
39 Phone: +44 (0) 20 7594 2703

40  
41 **Thomas Beaney**

42  
43 ORCID ID: 0000-0001-9709-7264

44  
45 Department of Primary Care and Public Health

46  
47 Charing Cross Campus, The Reynolds Building, St Dunstan's Road, London, W6 8RP

48  
49 Email: [thomas.beaney@imperial.ac.uk](mailto:thomas.beaney@imperial.ac.uk)

50  
51 Phone: +44 (0) 207 5943 368

52  
53 Word count: 4306

54  
55 Figures:3

56  
57 Tables:2

### **Contributorship and the guarantor**

DS, TB and CR conceived the paper, developed the survey materials, carried out the analysis, wrote the paper equally as joint lead authors and are the guarantors. CAdJ, PG, CU-M and SA-A developed the survey materials, managed the cohort and dataset and contributed to the analysis and writing and editing of the paper. AM, LM and AHM developed the survey materials, supervised and managed the survey collection and analysis, and contributed to the writing and editing of the paper. All authors developed the survey, carried out analysis and contributed to the development and editing of the paper.

### **Transparency declaration**

The lead authors confirm that the submitted manuscript is an honest, accurate and transparent account of the study being reported. No important aspects of the study have been omitted.

### **Ethics approval**

This research was approved by the Imperial College Research and Ethics Committee (ICREC) and Joint Research Compliance Office (22/04/2020; 20IC5942). All participants were required to provide informed consent before taking part in the study. Data collected as a part of this study are anonymized and kept strictly confidential in accordance with the UK General Data Protection Regulations (2016).

### **Data sharing**

This is an ongoing study, but anonymised data can be provided upon request for the purposes of further data analysis, and can be requested from the Data Management Co-ordinator, Parthenia Giannakopoulou: [parthenia.giannakopoulou13@imperial.ac.uk](mailto:parthenia.giannakopoulou13@imperial.ac.uk)

### **Dissemination declaration**

Participants in the CHARIOT cohort are informed by regular newsletter of all publications pertaining to the cohort.

### **Funding statement**

Work towards this article was in part supported by the National Institute for Health Research (NIHR) Applied Research Collaboration Northwest London and Imperial Biomedical Research Centre (BRC). DS and TB are supported by NIHR academic clinical fellowships. The views expressed in this publication are those of the authors and not necessarily those of the National Institute for Health Research or the Department of Health and Social Care. Imperial College London is the sponsor for the CCRR study, and has no influence on the direction or content of the work. There was no external financial funding for the study.

## Acknowledgements

We are grateful to Lesley Williamson, Monica Munoz-Troncoso, Snehal Pandya and Emily Pickering (CHARIOT register and facilitator team); Mariam Jiwani, Rachel Veeravalli, Islam Saiful, Danielle Rose, Susie Gold, Rachel Nejade and Shehla Shamsuddin (Imperial College London student volunteers); Stefan McGinn-Summers, Neil Beckford, Inthushaa Indrakumar and Kristina Lakey (Departmental administrative staff in AGE); Dinithi Perera (departmental manager); Heather McLellan-Young (project manager); Helen Ward, James McKeand, Geraint Price, Josip Car, Christina Atchison, Nicholas Peters, Aldo Faisal, and Jennifer Quint (investigator team contributing to CCRr survey design, development and improvement).

## Patient and public involvement:

Older adult volunteers (60-80 years of age) from various social and cultural backgrounds provided feedback on the survey content. This feedback was incorporated into the survey design.

## Conflicts of Interest

All authors have completed the ICMJE uniform disclosure form at [www.icmje.org/coi\\_disclosure.pdf](http://www.icmje.org/coi_disclosure.pdf) and declare: no support from any organisation for the submitted work; Lefkos T. Middleton reports research funding from Janssen, Novartis, Merck and Takeda, outside the submitted work.

## Licence

The Corresponding Author has the right to grant on behalf of all authors and does grant on behalf of all authors, [a worldwide licence](#) to the Publishers and its licensees in perpetuity, in all forms, formats and media (whether known now or created in the future), to i) publish, reproduce, distribute, display and store the Contribution, ii) translate the Contribution into other languages, create adaptations, reprints, include within collections and create summaries, extracts and/or, abstracts of the Contribution, iii) create any other derivative work(s) based on the Contribution, iv) to exploit all subsidiary rights in the Contribution, v) the inclusion of electronic links from the Contribution to third party material where-ever it may be located; and, vi) licence any third party to do any or all of the above.

## Abstract

**Objectives:** Physical inactivity is more common in older adults, is associated with social isolation and loneliness, and contributes to increased morbidity and mortality. We examined the effect of social restrictions to reduce COVID-19 transmission in the UK (lockdown), on physical activity (PA) levels of older adults, and the social predictors of any change.

**Design:** Baseline analysis of a survey-based prospective cohort study

**Setting:** Adults enrolled in the Cognitive Health in Ageing Register for Investigational and Observational Trials (CHARIOT) cohort from General Practitioner (GP) practices in North West London were invited to participate from April to July 2020.

**Participants:** 6,219 cognitively healthy adults aged 50 to 92 years completed the survey.

**Main outcome measures:** Self-reported PA before and after the introduction of lockdown, as measured by Metabolic Equivalent of Task (MET) minutes. Associations of PA with demographic, lifestyle and social factors, mood and frailty.

**Results:** Mean PA was significantly lower following the introduction of lockdown, from 3,519 MET minutes/week to 3,185 MET minutes/week ( $p < 0.001$ ). After adjustment for confounders and pre-lockdown PA, lower levels of PA after the introduction of lockdown were found in those who were over 85 years old (640 [95% CI: 246 to 1034] MET minutes/week less); were divorced or single (240 [95% CI: 120 to 360] MET minutes/week less); living alone (277 [95% CI: 152 to 402] MET minutes/week less); reported feeling lonely often (306 [95% CI: 60 to 552] MET minutes/week less); and showed symptoms of depression (1007 [95% CI: 1401 to 612] MET minutes/week less) compared to those aged 50-64 years, married, co-habiting, and not reporting loneliness or depression, respectively.

**Conclusions and Implications:** Markers of social isolation, loneliness and depression were associated with lower PA following the introduction of lockdown in the UK. Targeted interventions to increase PA in these groups should be considered.

### Strengths and limitations of this study:

- Out of 40,000 people contacted, 7320 responded and 6219 completed the survey
- A significant reduction in mean levels of physical activity were found in older adults after the introduction of lockdown measures.
- Multivariable analyses were adjusted for confounders according to pre-determined causal pathways

- Survey responders identified predominantly as White/Caucasian background, and showed higher levels of physical activity than the general population, which may limit the generalisability of the findings to other population groups
- The potential for recall bias from using a self-report questionnaire for physical activity levels (International Physical Activity Questionnaire – IPAQ). This includes reliance on recall for pre-lockdown PA levels

For peer review only

## 1.0 Background and Rationale

Physical inactivity adversely affects older adults, with 60-70% of those aged over 75 years not sufficiently physically active for good health<sup>1,2</sup> as defined by meeting World Health Organization (WHO)<sup>3</sup> and UK<sup>4</sup> guidelines. From March until June 2020 in the UK, a national 'lockdown' was implemented to reduce exposure to, and transmission of, COVID-19. Although applied to the whole population, adults aged over 70 years and those with underlying health conditions at higher risk of severe COVID-19 disease were asked to follow more stringent social distancing measures. These included remaining at home where possible; avoiding social mixing in the community; avoiding physically interacting with friends and family; and avoiding public transport (supplementary file 1: figure S1).<sup>5</sup>

Social isolation and loneliness in older adults, possibly exacerbated during lockdowns,<sup>6</sup> is associated with increases in morbidity and mortality, increased physical inactivity and sedentary time,<sup>7,8</sup> and reduced physical performance.<sup>9</sup> Physical inactivity may therefore have a role in mediating the increased morbidity and mortality associated with social isolation.<sup>10</sup> Physical activity (PA) is important in the prevention of sarcopenia, frailty and decreased functional ability in older adults.<sup>11</sup> Data collected on the pandemic, predominantly in younger adults and children, suggests a decrease in PA and an increase in sedentary time.<sup>12</sup> Given the increased susceptibility to physical inactivity and social isolation in older adults in particular, this is an important area of study.<sup>13</sup> We set up the CHARIOT COVID-19 Rapid Response study (CCRR) in April 2020 to monitor symptoms and the impact of the COVID-19 pandemic on various health and lifestyle factors, by repeat questionnaire survey of the Cognitive Health in Ageing Register for Investigational and Observational Trials (CHARIOT) members.

We hypothesised that imposed social restrictions would negatively impact on PA levels of older adults, and that change in PA after the introduction of lockdown would be modified by certain demographic, lifestyle and social factors, with a focus on markers of social isolation and perceived loneliness. An awareness of the extent of, and predictors for, change in PA levels will aid our understanding of the impact of social isolation on the health of older adults, both with respect to pandemic-related lockdowns and social isolation itself.

## 2.0 Methods

### 2.1 CCRR survey



1  
2  
3 Study participants were recruited from the CHARIOT register, a cohort of over 40,000  
4 cognitively healthy (without a known diagnosis of dementia) adult volunteers aged over 50  
5 years, recruited from 172 GP surgeries across West and North London as part of a  
6 collaboration between regional GP practices and the School of Public Health, at Imperial  
7 College London.  
8  
9  
10

11 This ongoing prospective cohort study was initiated in April 2020 with repeated questionnaire  
12 surveys conducted every six weeks. The CCRR baseline survey consists of questions  
13 related to basic demographics, diet, alcohol and smoking status, symptoms of COVID-19,  
14 functional activities, physical activity, sleep, frailty and mental health (supplementary file 2).  
15 For physical activity, the International Physical Activity Questionnaire (IPAQ) short-form (last  
16 7 days) was used,<sup>14</sup> asking respondents to document their weekly vigorous and moderate  
17 activity, walking and sitting time from the week prior to completing the survey; and for the  
18 week prior to implementation of social restriction measures. This has test-retest reliability of  
19 0.75 in those under the age of 60 years.<sup>15</sup> However, although less commonly studied in older  
20 populations, one study demonstrated reduced reliability, at 0.65 and 0.57 for men and  
21 women respectively aged 65-74 years, and 0.50 and 0.56 for those aged 75-89 years, but  
22 with adequate validity when assessed against objective measures.<sup>16</sup> For assessing frailty,  
23 the 5-point FRAIL scale,<sup>17,18</sup> (ordinal scale 1-5; predictive validity for mortality up to 10 years;  
24 HR: 2.60)<sup>19</sup> and for assessing mental health symptoms, the Hospital Anxiety and Depression  
25 (HADS) scale;<sup>20</sup> sensitivity and specificity 0.8 for both anxiety and depression;<sup>21</sup> 14  
26 questions on feelings related to anxiety and depression rated on a 4-level Likert scale) were  
27 used. A question on loneliness was used from the Imperial College Sleep Quality  
28 questionnaire; in turn adapted from the Pittsburgh Sleep Quality Index<sup>22</sup> and Centre for  
29 Epidemiologic Studies of Depression Scale<sup>23</sup>, for work-free periods.  
30  
31  
32  
33  
34  
35  
36  
37  
38  
39  
40  
41  
42

43 Participants were eligible for recruitment if they were participating in the CHARIOT Register,  
44 or were a consenting member of the household of a participant who wished to take part; had  
45 mental capacity to consent to participate; were willing and able to undertake an electronic  
46 questionnaire survey; were able to read, write and were fluent in English, or identify an  
47 informant who was. Participants were excluded where they were no longer participating in  
48 the CHARIOT register, or if they did not have access to electronic devices to complete the  
49 questionnaire surveys. Survey data used in the present analysis were completed between  
50 30<sup>th</sup> April and the 22<sup>nd</sup> July 2020, and a timeline of lockdown measures has been  
51 incorporated into the supplementary data (supplementary file 1: figure S1)  
52  
53  
54  
55  
56  
57  
58  
59  
60

This research was approved by the Imperial College Research and Ethics Committee (ICREC) and Joint Research Compliance Office (22/04/2020; 20IC5942)

## 2.2 Statistical analysis

All analyses were conducted using Stata version 16.1 (StataCorp 2019) and R.<sup>24,25</sup> Body Mass Index (BMI) was calculated as weight in kilograms divided by the square of height in metres and categorised according to standard WHO criteria. IPAQ data were cleaned according to the IPAQ data cleaning protocol,<sup>26</sup> and the Metabolic Equivalent of Task (MET) minutes per week, calculated for each activity and total activity (where 3.3 METS is considered equivalent to walking, and moderate and vigorous activity equivalent to 4 and 8 METS, respectively). Periods of activity under 10 minutes were excluded as per the protocol, excluding for vigorous, moderate and walking activities during lockdown, 25, 23 and 12 periods, respectively (for pre-lockdown activity, excluding 10, 13 and 3 periods of activity, respectively). To calculate the total MET minutes per week, the self-reported duration (minutes) and frequency (days) of each of these PA categories is multiplied by the specified metric (supplementary file 1: supplementary methods). Paired t-tests were used to compare the distributions of mean PA levels pre- and following the introduction of lockdown.

Measures of association with explanatory variables were explored in univariable linear regression models for two outcomes: i) overall weekly MET minutes after introduction of lockdown and ii) the difference in overall weekly MET minutes before versus after the introduction of lockdown. Multivariable models were constructed for the outcome of MET minutes after the introduction of lockdown, adjusting *a priori* each explanatory variable in turn for age, sex and ethnicity. Month of survey completion was also included in the model to account for seasonal changes, and the finding that physical activity after the introduction of lockdown varied by month (supplementary file 1: figure S2 and table S1). Weekly MET minutes before the introduction of lockdown was also included in the model given its strong association with activity levels after the introduction of lockdown, which remained significantly associated in all models. Denominators for each model vary according to the levels of missingness in variables included in the models, which was low for most variables, except for BMI (unrecorded in 51.4% of participants). Employment was re-categorised into four groups for the purposes of regression analysis (supplementary file 1: Table S2).

A causal diagram was constructed using DAGitty<sup>27</sup> (supplementary file 1: figure S3) to aid adjustment for confounders in order to separate the overall causal effects of marital status, loneliness and living alone on physical activity. Additional multivariable models were then constructed based on the causal diagram for loneliness, adjusting for age, sex, ethnicity,

household status, marital status, shielding status and frailty category. No further adjustment was necessary for marital status or household status. Residuals were plotted against fitted values to assess for outlying points and heteroskedasticity; and plots of Cook's distance and leverage against fitted values were examined to detect the presence of influential points.

### 2.3 Patient and public involvement:

Older adult volunteers (60-80 years of age) from various social and cultural backgrounds provided feedback on the survey content. This feedback was incorporated into the survey design. Participants in the CHARIOT cohort are informed by regular newsletter of all publications pertaining to the cohort.

## 3.0 Results

### 3.1 Participant characteristics

The survey was sent to 15,000 CHARIOT participants via email, with a subsequent 25,000 contacted by post. 7,320 participants responded and completed the survey. Of these respondents, 6,219 completed IPAQ data both before and after introduction of lockdown measures and were included in the final analysis.

Of the 6,219 participants included in the present study, 55.4% were female, and the majority (55.3%) were aged 65-74 years with a mean age of 70 years. 93.7% of respondents classified themselves as being of white ethnic background, with 2.8% of Asian ethnic background, and only 0.7% of black African or Caribbean background. Approximately half of participants (48.6%) had a recorded height and weight, with a mean BMI of 25.3 kg/m<sup>2</sup>. The majority of respondents were married (62.2%), co-habiting (72.8%) and retired (69.5%). Most respondents did not smoke (96.9%), drank alcohol (82.6%) and felt they ate a healthy diet (80.3%). 18.0% of respondents were classified as pre-frail, with 0.5% as frail and 26.2% reported that they were shielding at the time of the survey (table 1).

| Participant characteristic |                   | Total | Percent    |
|----------------------------|-------------------|-------|------------|
| Gender                     | Female            | 3,445 | 55.4%      |
|                            | Male              | 2,770 | 44.5%      |
|                            | Prefer not to say | 4     | 0.1%       |
| Age (years)                | Mean (SD)         |       | 69.9 (7.3) |
|                            | Median (IQR)      |       | 70 (66-74) |
|                            | Range             |       | 50 - 92    |
|                            | 50-64             | 1,212 | 19.5%      |
|                            | 65-74             | 3,440 | 55.3%      |
|                            | 75-84             | 1,394 | 22.4%      |
|                            | 85+               | 127   | 2.0%       |
| Missing data               | 46                | 0.7%  |            |

|                                               |                                                  |              |                  |
|-----------------------------------------------|--------------------------------------------------|--------------|------------------|
|                                               | <b>White</b>                                     | <b>5,825</b> | <b>93.7%</b>     |
|                                               | English/Welsh/Scottish/Northern<br>Irish/British | 5,143        | 82.7%            |
|                                               | Any other white background                       | 536          | 8.6%             |
|                                               | Irish                                            | 146          | 2.3%             |
|                                               | <b>Mixed/multiple ethnic groups</b>              | <b>99</b>    | <b>1.6%</b>      |
|                                               | White and Black African                          | 10           | 0.2%             |
|                                               | White and Asian                                  | 33           | 0.5%             |
|                                               | White and Black Caribbean                        | 7            | 0.1%             |
|                                               | Any other mixed/multiple ethnic<br>background    | 49           | 0.8%             |
|                                               | <b>Asian/Asian British</b>                       | <b>174</b>   | <b>2.8%</b>      |
|                                               | Indian                                           | 91           | 1.5%             |
|                                               | Pakistani                                        | 12           | 0.2%             |
|                                               | Bangladeshi                                      | 2            | 0.0%             |
|                                               | Chinese                                          | 32           | 0.5%             |
|                                               | Any other Asian background                       | 37           | 0.6%             |
|                                               | <b>Black/African/Caribbean/Black</b>             | <b>43</b>    | <b>0.7%</b>      |
|                                               | <b>British</b>                                   |              |                  |
|                                               | African                                          | 13           | 0.2%             |
|                                               | Caribbean                                        | 21           | 0.3%             |
|                                               | Any other                                        |              |                  |
|                                               | Black/African/Caribbean/Black<br>British         | 9            | 0.1%             |
|                                               | <b>Other ethnic group</b>                        | <b>64</b>    | <b>1.0%</b>      |
|                                               | Arab                                             | 17           | 0.3%             |
|                                               | Any other ethnic group                           | 47           | 0.8%             |
|                                               | <b>Prefer not to say</b>                         | <b>14</b>    | <b>0.2%</b>      |
|                                               | Mean (SD)                                        |              | 25.3 (5.1)       |
|                                               | Median (IQR)                                     |              | 24.4 (22.2-27.1) |
| <b>Body Mass Index (BMI)<br/>(Kg/m2)</b>      | <18.5 (underweight range)                        | 61           | 1.0%             |
|                                               | 18.5-24.9 (healthy weight)                       | 1,644        | 26.4%            |
|                                               | 25.0-29.9 (overweight)                           | 962          | 15.5%            |
|                                               | >=30.0 (obese range)                             | 358          | 5.8%             |
|                                               | Missing data                                     | 3,194        | 51.4%            |
| <b>Shielding at time of<br/>questionnaire</b> | No                                               | 4,591        | 73.8%            |
|                                               | Yes                                              | 1,628        | 26.2%            |
| <b>Marital status</b>                         | Married                                          | 3,869        | 62.2%            |
|                                               | Single                                           | 789          | 12.7%            |
|                                               | Widowed                                          | 601          | 9.7%             |
|                                               | Divorced                                         | 595          | 9.6%             |
|                                               | Living with a partner                            | 365          | 5.9%             |
| <b>Living arrangements</b>                    | Co-habiting                                      | 4,530        | 72.8%            |
|                                               | Living alone                                     | 1,689        | 27.2%            |
|                                               | Retired                                          | 4,322        | 69.5%            |
| <b>Employment</b>                             | Continuing to work in your usual<br>job; at home | 1,101        | 17.7%            |
|                                               | None of the above                                | 201          | 3.2%             |
|                                               | Furloughed (put on leave, still<br>getting paid) | 197          | 3.2%             |

1  
2  
3  
4  
5  
6  
7  
8  
9  
10  
11  
12  
13  
14  
15  
16  
17  
18  
19  
20  
21  
22  
23  
24  
25  
26  
27  
28  
29  
30  
31  
32  
33  
34  
35  
36  
37  
38  
39  
40  
41  
42  
43  
44  
45  
46  
47  
48  
49  
50  
51  
52  
53  
54  
55  
56  
57  
58  
59  
60

|                                |                                                                  |              |       |
|--------------------------------|------------------------------------------------------------------|--------------|-------|
|                                | Continuing to work in your usual job and leave home for your job | 141          | 2.3%  |
|                                | A key worker                                                     | 96           | 1.5%  |
|                                | Had to close your business due to COVID-19                       | 70           | 1.1%  |
|                                | Lost my job due to the lockdown                                  | 42           | 0.7%  |
|                                | Unemployed                                                       | 36           | 0.6%  |
|                                | A student                                                        | 13           | 0.2%  |
| <b>Current smoker</b>          | No                                                               | 6,027        | 96.9% |
|                                | Yes                                                              | 192          | 3.1%  |
| <b>Alcohol intake</b>          | No                                                               | 1,083        | 17.4% |
|                                | Yes                                                              | 5,136        | 82.6% |
|                                | No change from usual - already had a healthy diet                | 4,991        | 80.3% |
| <b>Diet</b>                    | My diet has become more healthy                                  | 715          | 11.5% |
|                                | My diet was healthy before but has got worse since lockdown      | 312          | 5.0%  |
|                                | No change from usual - my diet isn't very healthy                | 201          | 3.2%  |
| <b>FRAIL scale</b>             | Robust                                                           | 5,055        | 81.3% |
|                                | Pre-frail                                                        | 1,117        | 18.0% |
|                                | Frail                                                            | 34           | 0.5%  |
|                                | Missing data                                                     | 13           | 0.2%  |
| <b>Loneliness</b>              | Not ever                                                         | 2,994        | 48.1% |
|                                | Rarely                                                           | 1,469        | 23.6% |
|                                | Sometimes                                                        | 1,305        | 21.0% |
|                                | Often                                                            | 372          | 6.0%  |
|                                | Missing data                                                     | 79           | 1.3%  |
| <b>HADS (depression score)</b> | Normal (0-7)                                                     | 4,658        | 74.9% |
|                                | Borderline (8-10)                                                | 312          | 5.0%  |
|                                | Abnormal (11-21)                                                 | 116          | 1.9%  |
|                                | Missing data                                                     | 1,133        | 18.2% |
| <b>HADS (anxiety score)</b>    | Normal (0-7)                                                     | 4,335        | 69.7% |
|                                | Borderline (8-10)                                                | 486          | 7.8%  |
|                                | Abnormal (11-21)                                                 | 265          | 4.3%  |
|                                | Missing data                                                     | 1133         | 18.2% |
| <b>Total participants</b>      |                                                                  | <b>6,219</b> |       |

Table 1: Participant characteristics for 6,219 participants with complete data on physical activity; HADS – Hospital Anxiety and Depression Score

### 3.2 Physical activity before and after social distancing measures

Mean (SD) PA for participants prior to lockdown was 3,519 (2867) MET minutes/week. There was a significant reduction in mean MET minutes following implementation of lockdown to 3,185 (2673) MET minutes/week ( $p < 0.001$ ; table 2 & figure 1). 3,167 (50.9%) participants

decreased their activity following the introduction of lockdown by a mean (SD) of 1,957 (2025) MET minutes/week, 534 (8.6%) maintained the same level of activity, and 2,518 (40.5%) increased activity by a mean (SD) of 1,636 (1775) MET minutes/week. Mean sitting time increased by 276 MET minutes/week after the introduction of lockdown (2,680) compared to before (2,404) (table 2).

5,762 (92.7%) participants achieved at least the minimum guidance of 600 MET minutes/week of activity, as defined by WHO,<sup>3</sup> prior to implementation of lockdown measures, slightly reducing to 5,672 (91.2%) following their introduction ( $p < 0.001$ ). 5,039 (81.0%) achieved 1,200 MET minutes/week before lockdown, with 4,904 (78.9%) achieving this after the introduction of lockdown ( $p < 0.001$ , supplementary file 1: figure S4). Following the introduction of lockdown, PA levels varied by month of survey completion, with the highest levels in June and lowest levels in July. There was no significant difference between self-reported PA before lockdown by month of survey completion (supplementary file 1: figure S5).

| Physical activity type                  |                           | Before             | During             | p value for difference |
|-----------------------------------------|---------------------------|--------------------|--------------------|------------------------|
| <b>Vigorous activity</b>                | Mean (SD) minutes/week    | 145 (276)          | 135 (253)          | 0.004                  |
|                                         | Median (IQR) minutes/week | 40 (0 - 180)       | 10 (0 - 180)       |                        |
| <b>Moderate activity (minutes/week)</b> | Mean (SD) minutes/week    | 292 (430)          | 245 (374)          | <0.001                 |
|                                         | Median (IQR) minutes/week | 120 (0 - 360)      | 120 (0-360)        |                        |
| <b>Walking (minutes/week)</b>           | Mean (SD) minutes/week    | 462 (460)          | 403 (408)          | <0.001                 |
|                                         | Median (IQR) minutes/week | 360 (150 - 630)    | 315 (150 - 525)    |                        |
| <b>Sitting (minutes/week) *</b>         | Mean (SD) minutes/week    | 2404 (1137)        | 2680 (1181)        | <0.001                 |
|                                         | Median (IQR) minutes/week | 2100 (1680 - 2940) | 2520 (1680 - 3360) |                        |
| <b>MET minutes/week</b>                 | Mean (SD) minutes/week    | 3519 (2867)        | 3185 (2673)        | <0.001                 |
|                                         | Median (IQR) minutes/week | 2772 (1386 - 4650) | 2440 (1386 - 4185) |                        |

Table 2: Physical activity and sitting time for recipients before and following introduction of lockdown measures. Data presented as minutes per week with both mean (standard



1  
2  
3 deviation) and median (interquartile range) shown. p-values from paired t-test; \*denominator  
4 6,023; MET - Metabolic Equivalent of Task  
5  
6  
7

### 8 **3.3 Predictors of physical activity after the introduction of lockdown, and change from** 9 **before lockdown**

#### 10 **3.3.1 Demographic and lifestyle factors**

11  
12  
13  
14 Univariable linear regression models (supplementary file 1: table S3) showed  
15 statistically significant associations with lower PA after the introduction of lockdown in older  
16 age groups ( $p < 0.001$ ; figure 1), but no evidence of differences in the change from before  
17 lockdown between age groups ( $p = 0.184$ ; figure 2). After multivariable adjustment for age, sex,  
18 ethnicity, month of survey completion and pre-lockdown physical activity (supplementary file  
19 1: table S4) there was evidence of significantly lower levels of PA with increasing age, with  
20 adults aged 85 years and over doing on average 640 (95% CI: 246 to 1034) MET  
21 minutes/week less than those aged 50-64 years (figure 3). There was no significant difference  
22 in PA after the introduction of lockdown in males and females ( $p = 0.180$ ; figure 1), but females  
23 on average exhibited a greater decline in PA from before lockdown than males (450 vs 189  
24 MET minutes/week less respectively;  $p < 0.001$ ; figure 2). After multivariable adjustment, there  
25 was only a small and borderline significant difference in PA after lockdown was introduced  
26 between gender (PA in males on average 108 MET minutes/week more than females; 95%  
27 CI: -1 to 216; figure 3). No significant associations were seen between PA after the introduction  
28 of lockdown or change in PA according to ethnicity or employment status, before or after  
29 adjustment.  
30  
31

32  
33  
34  
35  
36  
37  
38  
39  
40 Lower levels of PA after the introduction of lockdown were seen with increasing BMI category,  
41 in current smokers and in those reporting an unhealthy or worsening diet before and after  
42 adjustment (figure 1). After adjustment, a dose-response relationship was evident between  
43 lower PA and increasing BMI ( $p = 0.030$ ), with obese individuals doing 578 (95% CI: 324 to  
44 832) MET minutes/week less than those of a healthy weight (figure 3). The denominator  
45 included in analyses of BMI was significantly lower than for other models, as BMI was  
46 unrecorded for 51.4% of participants. Current alcohol consumption was weakly associated  
47 with increased levels of PA in both univariable and multivariable models, with current drinkers  
48 reporting 145 MET minutes/week more than non-drinkers after adjustment (95% CI: 1 to 289;  
49 figures 2 & 3).  
50  
51  
52  
53  
54  
55

#### 56 **3.3.2 Associations with social isolation and loneliness**

57  
58  
59  
60

1  
2  
3 Participants who were divorced, single or widowed were, on average, less active after  
4 the introduction of lockdown than those married or living with a partner (3,026 vs 3,262 MET  
5 minutes/week;  $p=0.001$ ; figure 1); and exhibited a greater decline in PA from before lockdown  
6 (540 vs 236 MET minutes/week less;  $p<0.001$ ; figure 2). The association with PA after the  
7 introduction of lockdown remained after adjustment, with those divorced, single or widowed  
8 doing on average 240 (95% CI: 120 to 360) MET minutes/week less (figure 3). Participants  
9 living alone were also less active than those co-habiting and showed greater reductions in PA  
10 from before lockdown. After adjustment for confounders and PA before lockdown, those living  
11 alone were doing 277 (95% CI: 152 to 402) MET minutes/week less than those co-habiting  
12 (figure 3).  
13

14  
15 Significant associations were seen between PA after the introduction of lockdown and  
16 frequency of loneliness, with those 'often' experiencing loneliness achieving 2,938 MET  
17 minutes/week compared with 3,284 MET minutes/week in those 'never' experiencing  
18 loneliness ( $p=0.024$ ; figure 1). Greater declines in PA from before lockdown were also seen  
19 with increasing loneliness (figure 2). After adjustment, PA after the introduction of lockdown  
20 was significantly lower for those with increased frequency of loneliness (figure 3). After full  
21 adjustment including, in addition, household status, marital status, shielding status and frailty  
22 category, those experiencing loneliness 'often' reported 306 (95% CI: 60 to 552) MET  
23 minutes/week less activity than those 'never' lonely (supplementary file 1: table S5).  
24  
25

26  
27 Significantly lower physical activity levels were recorded in those shielding and in participants  
28 categorised as pre-frail or frail (both  $p<0.001$ ; figure 1). Larger declines in PA from before  
29 lockdown were seen in those shielding compared to those not shielding (588 vs 243 MET  
30 minutes/week less;  $p<0.001$ ; figure 2), but there was no significant difference in change in PA  
31 according to frailty category ( $p=0.389$ ; figure 2). After adjustment, frail participants were doing  
32 926 (95% CI: 189 to 1,663) MET minutes less on average than those classed as robust (figure  
33 3). Participants who were shielding were doing an average of 290 (95% CI: 163 to 417) MET  
34 minutes/week less than those not shielding (figure 3).  
35  
36

### 3.3.3 Associations with depression and anxiety

37  
38 Symptoms of depression were associated with lower levels of PA following the  
39 introduction of lockdown, with those meeting the criteria for depression reporting 2,450 MET  
40 minutes/week compared to 3,195 MET minutes/week in those with normal scores ( $p<0.001$ ;  
41 figure 1). There was no strong association with anxiety scores. Mean change in PA from before  
42 lockdown was associated with both depression and, in contrast to absolute PA levels, with  
43 anxiety scores. Participants with depression reported 1,450 MET minutes/week less on  
44 average after lockdown was introduced compared with before, while those with normal scores  
45  
46  
47  
48  
49  
50  
51  
52  
53  
54  
55  
56  
57  
58  
59  
60



1  
2  
3 reported 293 MET minutes/week less ( $p < 0.001$ ; figure 2). Similarly, in those with anxiety, PA  
4 reduced by 836 MET minutes/week compared to 312 MET minutes/week in those with normal  
5 scores ( $p = 0.004$ ; figure 2).  
6  
7

8 After adjustment, those meeting the criteria for depression on the HADS scale had significantly  
9 lower PA levels than those with normal scores, doing on average 1,007 (95% CI: 1401 to 612)  
10 MET minutes/week less (figure 3). There remained no statistically significant association  
11 between anxiety score and physical activity after adjustment.  
12  
13  
14  
15  
16  
17

## 18 **4.0 Discussion**

### 19 **4.1 Main findings**

20  
21 Data from the CCRR study show that participants experienced, on average, a significant  
22 decrease in PA after the introduction of lockdown in the UK when compared with before,  
23 together with an increase in sitting time. When adjusted for age, sex, ethnicity, month of  
24 survey completion and baseline physical activity, factors strongly associated with a reduction  
25 in PA include; increased age, increased BMI, frailty, current smoking, and a change to a less  
26 healthy diet. Factors associated with social isolation were also significantly associated with a  
27 reduction in PA: those divorced, single or widowed, living alone, shielding or reporting  
28 increased frequency of loneliness did significantly less PA after lockdown was introduced.  
29 Furthermore, a strong association was also seen with lower PA following the introduction of  
30 lockdown in those with depression, but not for those with anxiety.  
31  
32  
33  
34  
35  
36  
37

### 38 **4.2 The effect of lockdown on physical activity**

39  
40 There was a reduction in PA in over half of our participants, and a decrease in mean  
41 levels of PA by 333 MET minutes/week following the introduction of lockdown measures in the  
42 UK. This was accompanied by an increase in sitting time by 276 minutes per week, an adverse  
43 finding given the adverse health impacts associated with increased sedentary and sitting  
44 time.<sup>28</sup> These findings correlate with other studies from the UK (a decrease in 25% of adults  
45 aged over 20 years following lockdown),<sup>29</sup> Spain<sup>30</sup> and China,<sup>31</sup> and from a global survey  
46 collected in 8 different languages,<sup>32</sup> despite the differences in outdoor exercise permissions  
47 between countries. Reductions in PA may impact disproportionately across society. We found  
48 that increasing age associated with a reduction in PA after lockdown was introduced,  
49 corresponding with that seen in Japan, with a 26.5% (65 minutes) decrease in total physical  
50 activity in adults aged 65 to 84.<sup>33</sup> The UK Active Lives Survey found a 7.3% reduction in the  
51 proportion of active adults aged 55-74 years, from 63% to 56%, during the pandemic, and a  
52 6.6% reduction in those aged 75 years and above, from 42% to 35%.<sup>34</sup> A self-reported study  
53  
54  
55  
56  
57  
58  
59  
60

1  
2  
3 in the UK found that those with a diagnosis of obesity, hypertension, lung disease, depression  
4 or a disability were more likely to reduce PA during lockdown.<sup>29</sup>  
5  
6

### 7 **4.3 Social relationships, loneliness, and physical activity**

8

9 Individuals for whom social engagement was more likely to be restricted, such as  
10 those who were shielding, divorced, single, widowed, or living alone, were more likely to  
11 have lower levels of PA after lockdown implementation, and to have declined to a greater  
12 extent. Similarly, those who subjectively reported feeling lonely were more likely to have  
13 lower PA levels, and greater declines from before lockdown. These associations remained  
14 significant after multivariable adjustment.  
15  
16  
17  
18

19 Associations between health behaviours, including PA, and social relationships have been  
20 noted previously. Data from the English Longitudinal Study of Ageing (ELSA) showed that  
21 socially isolated respondents were less likely to report healthy diets, and more likely to  
22 smoke.<sup>7</sup> Crucially, they showed reduced activity counts in socially isolated individuals  
23 (measured by accelerometer) in a sample of adults older than 50 years,<sup>8</sup> and reduced self-  
24 reported moderate to vigorous physical activity.<sup>7</sup> This is particularly important given that  
25 isolated and lonely individuals are at an increased risk of morbidity and mortality from  
26 cardiovascular events, with the majority of this association mediated by risk factors which  
27 include physical inactivity.<sup>35</sup> Fixed effect models from the ELSA cohort show that social  
28 disengagement, domestic isolation and loneliness are associated with measures of poorer  
29 physical performance, and although they appear to be independent of physical activity, may  
30 still be associated along the causal pathway.<sup>9</sup> Studies of spousal pairs found that both men  
31 and women in married couples had greater levels of PA than their single counterparts,<sup>36</sup> and  
32 changes in PA are positively associated with changes in the PA of a spouse.<sup>37</sup> Increasing PA  
33 is associated with larger,<sup>38,39</sup> more diverse<sup>40</sup> and more heterogenous (in terms of PA) social  
34 networks, and having more physically active people in a social network is associated with  
35 being more active.<sup>41</sup>  
36  
37  
38  
39  
40  
41  
42  
43  
44  
45  
46

47 The interaction between social relationships and PA levels may be bi-directional. Levels of  
48 PA are influenced by multiple factors at different levels, including individual (psychological,  
49 genetic); interpersonal (social networks); environmental (social, built, natural); and regional  
50 or global determinants.<sup>42</sup> Social networks might influence PA through social support for  
51 individuals to take up and maintain activity, but also by regulating social norms, and  
52 associating PA with social connections or attachments.<sup>43</sup> There may also be increased  
53 opportunities for PA<sup>41</sup> when social networks are present.  
54  
55  
56  
57  
58

### 59 **4.4 Mood and physical activity**

60

1  
2  
3 In those reporting symptoms of depression, there were significantly lower levels of  
4 PA and a significant decrease in activity when compared to before lockdown. These findings  
5 correlate with those from the UK,<sup>44</sup> Australia,<sup>45</sup> and Spain,<sup>46</sup> which found inverse  
6 associations between physical activity levels and poor mental health. Similarly, a cross  
7 sectional study of Brazilian adults who were self-isolating found lower odds of symptoms of  
8 anxiety or depression in those who were performing over 30 or 15 minutes per day of  
9 moderate or vigorous activity respectively, and higher odds in those with prolonged  
10 sedentary time over 10 hours.<sup>47</sup> The associations between PA and mental health are well  
11 known, with positive impacts on wellbeing,<sup>48</sup> and reduced incidence and severity of  
12 symptoms of mental ill-health.<sup>49-51</sup> Therefore, these findings are unsurprising, although the  
13 interaction between PA and reduced markers of mental ill-health in older adults may be bi-  
14 directional. Moreover, social isolation and loneliness may mediate some of this effect:  
15 previous data from the CCRR cohort showed an interaction between social isolation,  
16 loneliness, and female gender with worsening depression and anxiety over lockdown.<sup>52</sup> We  
17 found no statistically significant difference in PA following the introduction of lockdown with  
18 anxiety symptoms, at odds with previous studies.<sup>44</sup> However, the trajectory of anxiety  
19 symptoms is not known, and it is not clear whether anxiety symptoms pre-dated the  
20 introduction of lockdown.  
21  
22  
23  
24  
25  
26  
27  
28  
29  
30  
31

#### 32 **4.5 Health behaviours and physical activity**

33  
34 A decrease in PA was associated with other detrimental health behaviours, including  
35 unhealthy diet and smoking. A similar tendency of clustering of unhealthy behaviours during  
36 the COVID-19 pandemic was noted in a cohort of patients in Spain with type 2 diabetes  
37 mellitus, who showed an increase in sugary foods and snack consumption alongside an  
38 increase in sitting time, and a decrease in time spent walking or doing moderate physical  
39 activity during lockdown when compared to beforehand.<sup>53</sup> That detrimental health  
40 behaviours might coincide in response to lockdown shows the importance of targeted  
41 interventions for certain groups. Interestingly, alcohol consumption was seen to be a  
42 protective factor in our cohort, and this does not tie with other findings on the negative  
43 associations with increased alcohol use during the COVID-19 pandemic.<sup>54</sup> This may be due  
44 to the specific demographic features of our cohort, but the possibility of alcohol consumption  
45 being associated with social interaction in this group cannot be excluded.  
46  
47  
48  
49  
50  
51  
52  
53

#### 54 **4.6 Limitations**

55  
56 This study has several limitations which may impact the generalisability of our  
57 findings. First, the CCRR cohort appear more physically active than the general population.  
58 90% of participants in CCRR achieved minimum WHO (2010) <sup>3</sup> guidance, both before and  
59  
60

1  
2  
3 following the introduction of lockdown. Over 78% achieved double this amount, and mean  
4 levels of PA were at least five times greater than the minimum recommendation. In contrast,  
5 only 61% of UK adults aged 55-74 years achieve minimum recommended WHO (2010)  
6 levels.<sup>2</sup> Despite this, CCRR participants may still not be active enough for major health  
7 gains. A 2016 systematic review and meta-analysis suggested that optimal risk reduction for  
8 breast and colorectal cancer, diabetes, ischaemic heart disease and stroke events were  
9 obtained from physical activity at 3000-4000 MET minutes per week.<sup>55</sup>  
10  
11

12  
13  
14  
15 Second, there are differences in demography between the CCRR cohort and the general  
16 population of the UK, which may explain the higher levels of PA we observed. 93% of CCRR  
17 respondents identify as white/Caucasian ethnicity. The Active Lives Survey demonstrated a  
18 difference in those achieving minimum activity levels in White British individuals (65%) and  
19 those from Black (58%) and Asian (54%) ethnicities.<sup>2</sup> Third, the CCRR survey relies on self-  
20 report, using the short form IPAQ. IPAQ data is well validated across diverse participants up  
21 to the age of 65 years<sup>14</sup> and a study of the performance of the IPAQ in older Japanese  
22 adults demonstrated adequate validity.<sup>16</sup> However, results from self-reporting tools for PA  
23 only weakly correlate with those from objective measures, such as accelerometers and  
24 pedometers.<sup>56-59</sup> Finally, recall bias and seasonal changes in physical activity may also have  
25 impacted on the results, with the additional factor that data were collected remotely rather  
26 than face to face (although there was necessary due to pandemic control measures). The  
27 CCRR survey was collected in April-July 2020, with participants asked to recall PA levels in  
28 the week before lockdown, which over time may become less reliable. However, no  
29 significant differences were found in the mean PA levels reported before lockdown according  
30 to month of survey completion and although there were apparent differences in PA following  
31 the introduction of lockdown by month, we were able to adjust for this in multivariable  
32 models. Furthermore, social restriction measures are dynamic and change over time, with a  
33 loosening of restrictions by 4<sup>th</sup> July 2020, and as a result the majority of the small proportion  
34 of respondents from July were reported outside of actual lockdown measures. However,  
35 changes to physical activity may persist, and the CCRR prospective cohort study is ongoing,  
36 with follow-up questionnaires sent to participants at regular intervals. When complete this will  
37 allow for long-term impacts to be measured, accounting for seasonal variation and changes  
38 to restriction measures over time.  
39  
40  
41  
42  
43  
44  
45  
46  
47  
48  
49  
50  
51  
52

#### 53 **4.7 Conclusions**

54  
55 Findings from our CCRR study suggest a significant decline in average PA levels in  
56 older adults following the introduction of lockdown measures during the COVID-19  
57 pandemic. These are in keeping with similar decreases across age ranges, including healthy  
58  
59  
60

adults, children and adolescents, and in those with medical conditions,<sup>12</sup> and are particularly concerning given the negative health connotations of physical inactivity. Moreover, even before the pandemic, older adults were more physically inactive than younger individuals, with only 61% and 40% of those aged 55-74 and 75 years old respectively meeting recommended levels of PA.<sup>2</sup>

In our study, lower activity levels after the introduction of lockdown were strongly linked to older age, and to those with objective markers of social isolation, subjective feelings of loneliness and symptoms of depression. Strategies and targeted interventions to increase and sustain PA levels in older adults are needed to mitigate the adverse health impacts not only of COVID-19 related lockdowns, but of social isolation in general. A recent systematic review suggested that digital behavioural change interventions can increase physical activity levels, and decrease sedentary time, in older adults, and this may be an area of future research for physical activity in the context of social isolation.<sup>11,60</sup> Although there can be no 'one size fits all' approach,<sup>13</sup> interventions should consider social relationships in their design and implementation.

## 6.0 References

- 1 NHS Digital. Health Survey for England 2016 Physical activity in adults. 2017 <https://files.digital.nhs.uk/publication/m/3/hse16-adult-phy-act.pdf>.
- 2 Sport England. Active Lives Adult Survey November 2018/19 Report. 2020 [https://sportengland-production-files.s3.eu-west-2.amazonaws.com/s3fs-public/2020-04/Active Lives Adult November 18-19 Report..pdf?BhkAy2K28pd9bDEz\\_NuisHI2ppuqJtpZ](https://sportengland-production-files.s3.eu-west-2.amazonaws.com/s3fs-public/2020-04/Active Lives Adult November 18-19 Report..pdf?BhkAy2K28pd9bDEz_NuisHI2ppuqJtpZ).
- 3 World Health Organization. Global Recommendations on Physical Activity for Health. 2010 <https://www.who.int/publications/i/item/9789241599979>.
- 4 Davies SC, Atherton F, McBride M, Calderwood C. UK Chief Medical Officers' Physical Activity Guidelines. 2019.
- 5 Gov.uk. UK Government COVID-19 guidance. .
- 6 Wu B. Social isolation and loneliness among older adults in the context of COVID-19: a global challenge. *Glob Heal Res Policy* 2020; **5**: 27.
- 7 Kobayashi LC, Steptoe A. Social Isolation, Loneliness, and Health Behaviors at Older Ages: Longitudinal Cohort Study. *Ann Behav Med* 2018; **52**: 582–93.
- 8 Schrempft S, Jackowska M, Hamer M, Steptoe A. Associations between social isolation, loneliness, and objective physical activity in older men and women. *BMC Public Health* 2019; **19**: 74.
- 9 Philip KEJ, Polkey MI, Hopkinson NS, Steptoe A, Fancourt D. Social isolation, loneliness and physical performance in older-adults: fixed effects analyses of a cohort study. *Sci Rep* 2020; **10**: 13908.
- 10 Elovainio M, Hakulinen C, Pulkki-Råback L, *et al*. Contribution of risk factors to excess mortality in isolated and lonely individuals: an analysis of data from the UK Biobank cohort study. *Lancet Public Heal* 2017. DOI:10.1016/S2468-2667(17)30075-0.



- 1  
2  
3 11 Izquierdo M, Duque G, Morley JE. Physical activity guidelines for older people: knowledge gaps and future directions. *Lancet Heal Longev* 2021; **2**: e380–3.  
4  
5  
6 12 Stockwell S, Trott M, Tully M, *et al*. Changes in physical activity and sedentary behaviours from before to during the COVID-19 pandemic lockdown: a systematic review. *BMJ Open Sp Ex Med* 2021; **7**: 960.  
7  
8  
9  
10 13 Fakoya OA, McCorry NK, Donnelly M. Loneliness and social isolation interventions for older adults: A scoping review of reviews. *BMC Public Health* 2020; **20**: 129.  
11  
12 14 Craig CL, Marshall AL, Sjöström M, *et al*. International physical activity questionnaire: 12-country reliability and validity. *Med Sci Sports Exerc* 2003; **35**: 1381–95.  
13  
14 15 Silsbury Z, Goldsmith R, Rushton A. Systematic review of the measurement properties of self-report physical activity questionnaires in healthy adult populations. *BMJ Open* 2015; **5**: e008430.  
15  
16 16 Tomioka K, Iwamoto J, Saeki K, Okamoto N. Reliability and validity of the international physical activity questionnaire (IPAQ) in elderly adults: The Fujiwara-kyo study. *J Epidemiol* 2011. DOI:10.2188/jea.JE20110003.  
17  
18 17 Gleason LJ, Benton EA, Alvarez-Nebreda ML, Weaver MJ, Harris MB, Javedan H. FRAIL Questionnaire Screening Tool and Short-Term Outcomes in Geriatric Fracture Patients. *J Am Med Dir Assoc* 2017; **18**: 1082–6.  
19  
20 18 Woo J, Yu R, Wong M, Yeung F, Wong M, Lum C. Frailty screening in the community using the FRAIL scale. *J Am Med Dir Assoc* 2015. DOI:10.1016/j.jamda.2015.01.087.  
21  
22 19 Thompson MQ, Theou O, Tucker GR, Adams RJ, Visvanathan R. FRAIL scale: Predictive validity and diagnostic test accuracy. *Australas J Ageing* 2020; **39**: e529–36.  
23  
24 20 Zigmond AS, Snaith RP. The Hospital Anxiety and Depression Scale. *Acta Psychiatr Scand* 1983. DOI:10.1111/j.1600-0447.1983.tb09716.x.  
25  
26 21 Bjelland I, Dahl AA, Haug TT, Neckelmann D. The validity of the Hospital Anxiety and Depression Scale: An updated literature review. *J Psychosom Res* 2002; **52**: 69–77.  
27  
28 22 Buysse DJ, Reynolds CF, Monk TH, Berman SR, Kupfer DJ. The Pittsburgh sleep quality index: A new instrument for psychiatric practice and research. *Psychiatry Res* 1989. DOI:10.1016/0165-1781(89)90047-4.  
29  
30 23 Radloff LS. The CES-D Scale: A Self-Report Depression Scale for Research in the General Population. *Appl Psychol Meas* 1977. DOI:10.1177/014662167700100306.  
31  
32 24 R Core Team. R: A language and environment for statistical computing. R Found. Stat. Comput. 2019.  
33  
34 25 Viechtbauer W. Conducting meta-analyses in R with the metafor. *J Stat Softw* 2010; **36**: 1–48.  
35  
36 26 IPAQ scoring protocol - International Physical Activity Questionnaire. <https://sites.google.com/site/theipaq/scoring-protocol> (accessed Dec 1, 2020).  
37  
38 27 Textor J, van der Zander B, Gilthorpe MS, Liśkiewicz M, Ellison GT. Robust causal inference using directed acyclic graphs: The R package ‘dagitty’. *Int J Epidemiol* 2016. DOI:10.1093/ije/dyw341.  
39  
40 28 Ekelund U, Tarp J, Steene-Johannessen J, *et al*. Dose-response associations between accelerometry measured physical activity and sedentary time and all cause mortality: Systematic review and harmonised meta-analysis. *BMJ* 2019.  
41  
42  
43  
44  
45  
46  
47  
48  
49  
50  
51  
52  
53  
54  
55  
56  
57  
58  
59  
60

- DOI:10.1136/bmj.l4570.
- 29 Rogers NT, Waterlow NR, Brindle H, *et al.* Behavioral Change Towards Reduced Intensity Physical Activity Is Disproportionately Prevalent Among Adults With Serious Health Issues or Self-Perception of High Risk During the UK COVID-19 Lockdown . *Front. Public Heal.* . 2020; **8**: 526.
- 30 Castañeda-Babarro A, Arbillaga-Etxarri A, Gutiérrez-Santamaría B, Coca A. Physical Activity Change during COVID-19 Confinement. *Int J Environ Res Public Health* 2020; **17**: 1–10.
- 31 Wang X, Lei SM, Le S, *et al.* Bidirectional Influence of the COVID-19 Pandemic Lockdowns on Health Behaviors and Quality of Life among Chinese Adults. DOI:10.3390/ijerph17155575.
- 32 Ammar A, Brach M, Trabelsi K, *et al.* Effects of COVID-19 Home Confinement on Eating Behaviour and Physical Activity: Results of the ECLB-COVID19 International Online Survey. *Nutrients* 2020; **12**. DOI:<https://dx.doi.org/10.3390/nu12061583>.
- 33 Yamada M, Kimura Y, Ishiyama D, *et al.* Effect of the COVID-19 Epidemic on Physical Activity in Community-Dwelling Older Adults in Japan: A Cross-Sectional Online Survey. *J Nutr Health Aging* 2020; : 1–3.
- 34 Active Lives Adult Survey Coronavirus (Covid-19) Report. 2020 [https://sportengland-production-files.s3.eu-west-2.amazonaws.com/s3fs-public/2020-10/Active Lives Adult May 19-20 Coronavirus Report.pdf?2L6TBVV5UvCGXb\\_VxZcWHcfFX0\\_wRal7](https://sportengland-production-files.s3.eu-west-2.amazonaws.com/s3fs-public/2020-10/Active%20Lives%20Adult%20May%2019-20%20Coronavirus%20Report.pdf?2L6TBVV5UvCGXb_VxZcWHcfFX0_wRal7) (accessed Feb 8, 2021).
- 35 Hakulinen C, Pulkki-Råback L, Virtanen M, Jokela M, Kivimäki M, Elovainio M. Social isolation and loneliness as risk factors for myocardial infarction, stroke and mortality: UK Biobank cohort study of 479 054 men and women. *Heart* 2018. DOI:10.1136/heartjnl-2017-312663.
- 36 Pettee KK, Brach JS, Kriska AM, *et al.* Influence of marital status on physical activity levels among older adults. *Med Sci Sports Exerc* 2006; **38**: 541–6.
- 37 Cobb LK, Godino JG, Selvin E, Kucharska-Newton A, Coresh J, Koton S. Spousal influence on physical activity in middle-aged and older adults. *Am J Epidemiol* 2016; **183**: 444–51.
- 38 Marquez B, Elder JP, Arredondo EM, Madanat H, Ji M, Ayala GX. Social network characteristics associated with health promoting behaviors among Latinos. *Heal Psychol* 2014; **33**: 544–53.
- 39 Tamers SL, Okechukwu C, Allen J, *et al.* Are social relationships a healthy influence on obesogenic behaviors among racially/ethnically diverse and socio-economically disadvantaged residents? *Prev Med (Baltim)* 2013; **56**: 70–4.
- 40 Legh-Jones H, Moore S. Network social capital, social participation, and physical inactivity in an urban adult population. *Soc Sci Med* 2012; **74**: 1362–7.
- 41 Mötteli S, Dohle S. Egocentric social network correlates of physical activity. *J Sport Heal Sci* 2020; **9**: 339–44.
- 42 Bauman AE, Reis RS, Sallis JF, *et al.* Correlates of physical activity: Why are some people physically active and others not? *Lancet*. 2012. DOI:10.1016/S0140-6736(12)60735-1.
- 43 McNeill LH, Kreuter MW, Subramanian S V. Social Environment and Physical activity: A review of concepts and evidence. *Soc Sci Med* 2006; **63**: 1011–22.

- 1  
2  
3 44 Jacob L, Tully MA, Barnett Y, *et al.* The relationship between physical activity and  
4 mental health in a sample of the UK public: A cross-sectional study during the  
5 implementation of COVID-19 social distancing measures. *Ment Health Phys Act* 2020;  
6 **19**: 100345.  
7
- 8 45 Stanton R, To QG, Khaledi S, *et al.* Depression, Anxiety and Stress during COVID-19:  
9 Associations with Changes in Physical Activity, Sleep, Tobacco and Alcohol Use in  
10 Australian Adults. *Int J Environ Res Public Health* 2020; **17**: 4065.  
11
- 12 46 López-Bueno R, Calatayud J, Ezzatvar Y, *et al.* Association Between Current Physical  
13 Activity and Current Perceived Anxiety and Mood in the Initial Phase of COVID-19  
14 Confinement . *Front. Psychiatry* . 2020; **11**: 729.  
15
- 16 47 Schuch FB, Bulzing RA, Meyer J, *et al.* Associations of moderate to vigorous physical  
17 activity and sedentary behavior with depressive and anxiety symptoms in self-isolating  
18 people during the COVID-19 pandemic: A cross-sectional survey in Brazil. *Psychiatry*  
19 *Res* 2020; **292**: 113339.  
20
- 21 48 Penedo FJ, Dahn JR. Exercise and well-being: A review of mental and physical health  
22 benefits associated with physical activity. *Curr. Opin. Psychiatry*. 2005.  
23 DOI:10.1097/00001504-200503000-00013.  
24
- 25 49 Chekroud SR, Gueorguieva R, Zheutlin AB, *et al.* Association between physical  
26 exercise and mental health in 1.2 million individuals in the USA between 2011 and  
27 2015: a cross-sectional study. *The Lancet Psychiatry* 2018. DOI:10.1016/S2215-  
28 0366(18)30227-X.  
29
- 30 50 McDowell CP, Dishman RK, Gordon BR, Herring MP. Physical Activity and Anxiety: A  
31 Systematic Review and Meta-analysis of Prospective Cohort Studies. *Am. J. Prev.*  
32 *Med.* 2019; **57**: 545–56.  
33
- 34 51 Schuch FB, Vancampfort D, Firth J, *et al.* Physical activity and incident depression: A  
35 meta-analysis of prospective cohort studies. *Am J Psychiatry* 2018.  
36 DOI:10.1176/appi.ajp.2018.17111194.  
37
- 38 52 Robb CE, de Jager CA, Ahmadi-Abhari S, *et al.* Associations of Social Isolation with  
39 Anxiety and Depression During the Early COVID-19 Pandemic: A Survey of Older  
40 Adults in London, UK. *Front Psychiatry* 2020. DOI:10.3389/fpsy.2020.591120.  
41
- 42 53 Ruiz-Roso MB, Knott-Torcal C, Matilla-Escalante DC, *et al.* COVID-19 Lockdown and  
43 Changes of the Dietary Pattern and Physical Activity Habits in a Cohort of Patients  
44 with Type 2 Diabetes Mellitus. *Nutrients* 2020; **12**. DOI:10.3390/nu12082327.  
45
- 46 54 Sallie SN, Ritou V, Bowden-Jones H, Voon V. Assessing international alcohol  
47 consumption patterns during isolation from the COVID-19 pandemic using an online  
48 survey: highlighting negative emotionality mechanisms. *BMJ Open* 2020; **10**:  
49 e044276.  
50
- 51 55 Kyu HH, Bachman VF, Alexander LT, *et al.* Physical activity and risk of breast cancer,  
52 colon cancer, diabetes, ischemic heart disease, and ischemic stroke events:  
53 systematic review and dose-response meta-analysis for the Global Burden of Disease  
54 Study 2013. *BMJ* 2016; **354**: i3857.  
55
- 56 56 Prince SA, Adamo KB, Hamel ME, Hardt J, Connor Gorber S, Tremblay M. A  
57 comparison of direct versus self-report measures for assessing physical activity in  
58 adults: a systematic review. *Int J Behav Nutr Phys Act* 2008; **5**: 56.  
59
- 60 57 Lee PH, Macfarlane DJ, Lam TH, Stewart SM. Validity of the international physical  
activity questionnaire short form (IPAQ-SF): A systematic review. *Int. J. Behav. Nutr.*



- 1  
2  
3 Phys. Act. 2011; **8**: 115.  
4  
5 58 Cleland C, Ferguson S, Ellis G, Hunter RF. Validity of the International Physical  
6 Activity Questionnaire (IPAQ) for assessing moderate-to-vigorous physical activity  
7 and sedentary behaviour of older adults in the United Kingdom. *BMC Med Res*  
8 *Methodol* 2018; **18**. DOI:10.1186/s12874-018-0642-3.  
9  
10 59 Kowalski K, Rhodes R, Naylor P-J, Tuokko H, MacDonald S. Direct and indirect  
11 measurement of physical activity in older adults: a systematic review of the literature.  
12 *Int J Behav Nutr Phys Act* 2012; **9**: 148.  
13  
14 60 Stockwell S, Schofield P, Fisher A, *et al*. Digital behavior change interventions to  
15 promote physical activity and/or reduce sedentary behavior in older adults: A  
16 systematic review and meta-analysis. *Exp Gerontol* 2019; **120**: 68–87.  
17  
18

## 19 7.0 Figure legends

20  
21 Figure 1: Forest plot of unadjusted univariable associations with physical activity (PA)  
22 following the introduction of lockdown measures (during/in lockdown). Data presented as  
23 mean MET minutes/week +/- 95% confidence interval. Heavy dashed line – 600 MET  
24 minutes/week (WHO minimal physical activity guideline for adults); light dashed line – mean  
25 MET minutes for the whole cohort. See also supplementary file 1: table S3; HADS – Hospital  
26 Anxiety and Depression Score; MET – Metabolic Equivalent of Task; PA – Physical Activity;  
27 WHO – World Health Organization  
28

29  
30 Figure 2: Forest plot of unadjusted mean change in physical activity (PA), following the  
31 introduction of lockdown from before, for all variables (mean MET minutes/week +/- 95%  
32 confidence interval). Negative values indicate a decline in activity after the introduction of  
33 lockdown when compared to before. See also supplementary file 1: table S3; HADS –  
34 Hospital Anxiety and Depression Score; MET – Metabolic Equivalent of Task; PA – Physical  
35 Activity  
36

37  
38 Figure 3: Forest plot of multivariable associations with physical activity after the introduction  
39 of lockdown (during/in lockdown), adjusted for age, sex, ethnicity, month of year of survey  
40 completion and baseline physical activity. Data presented as mean MET minutes/week +/-  
41 95% confidence interval, compared to the reference group, with negative values indicating  
42 lower physical activity than the reference. See also supplementary file 1: table S4; HADS –  
43 Hospital Anxiety and Depression Score; MET – Metabolic Equivalent of Task; PA – Physical  
44 Activity  
45  
46  
47  
48  
49  
50  
51  
52  
53  
54  
55  
56  
57  
58  
59  
60

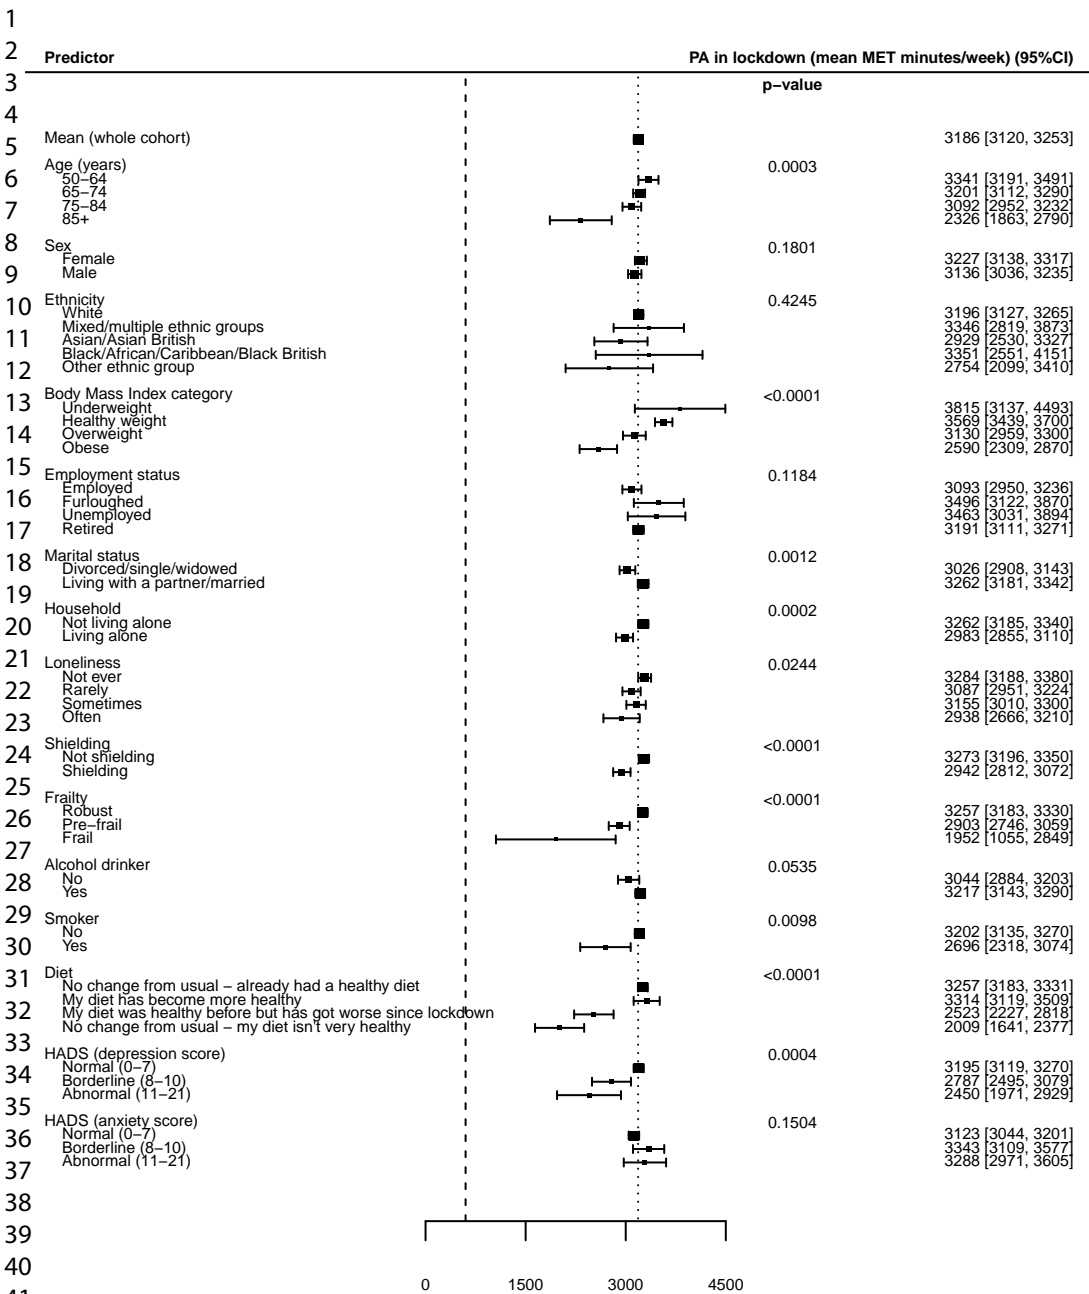

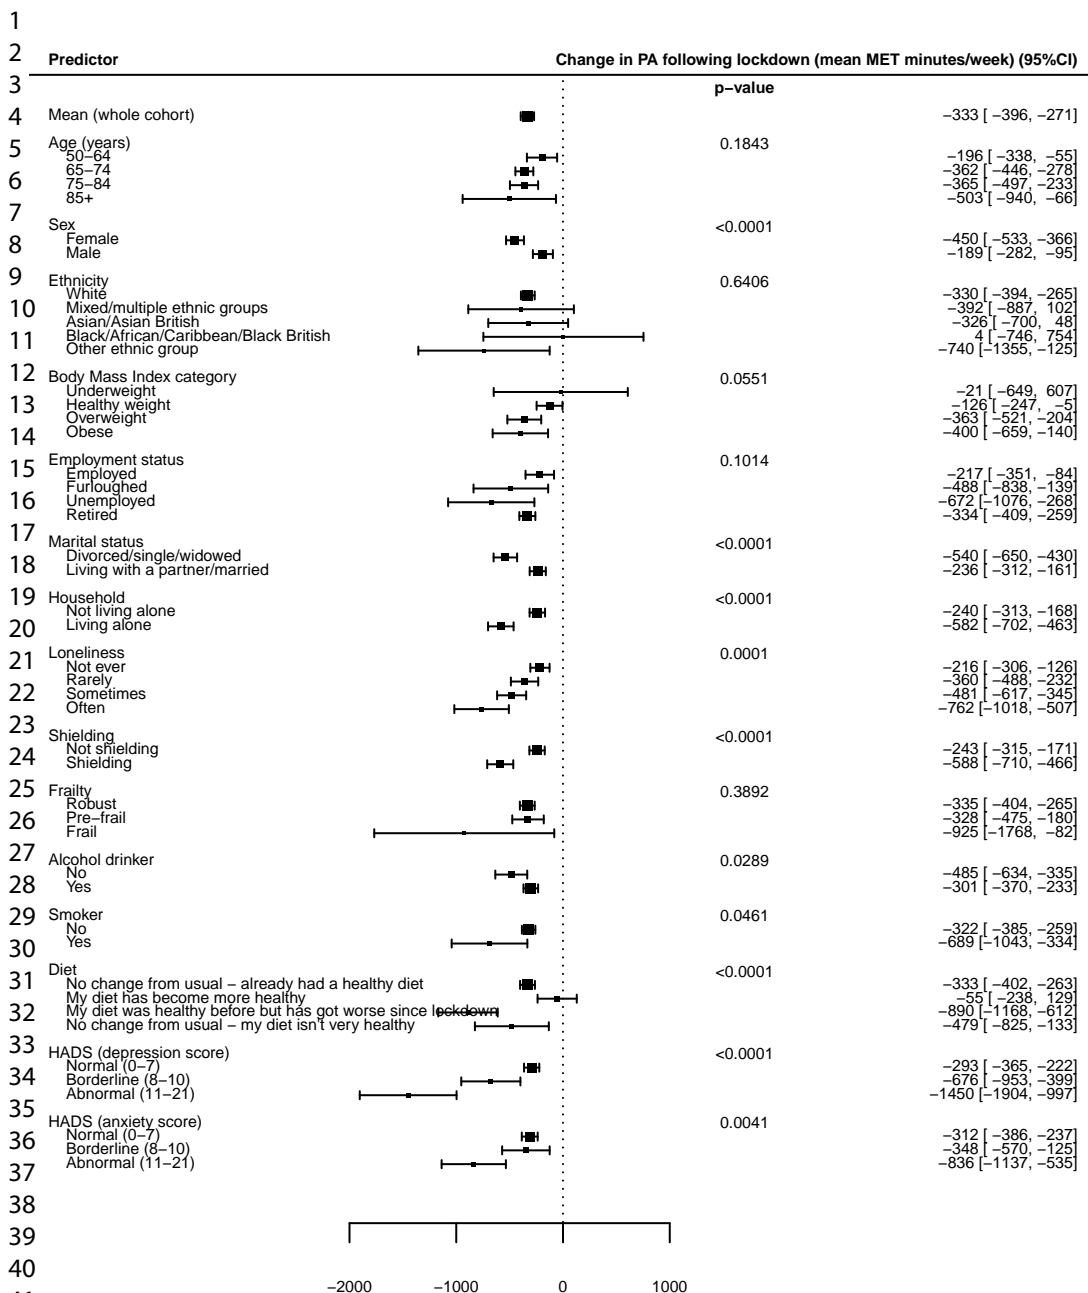

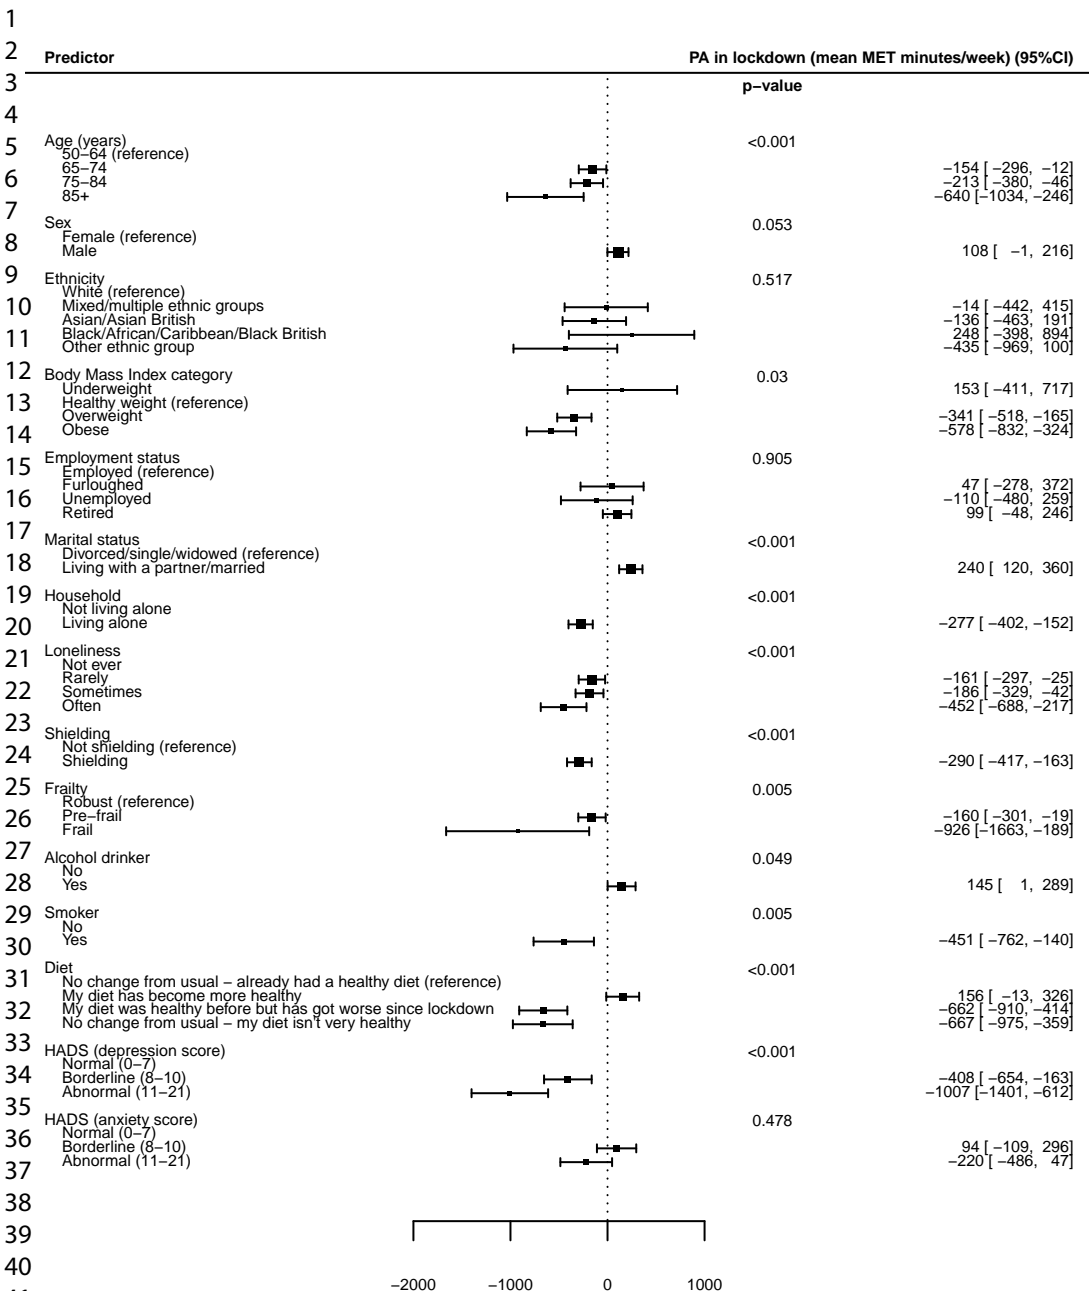

## Supplementary file 1

### Supplementary methods

#### Metabolic Equivalent of Task (MET) calculation

Briefly, 1 MET equates to an individual's resting energy expenditure. According to the IPAQ scoring protocol, 3.3 METS is considered equivalent to walking, and moderate and vigorous activity to be 4 and 8 METS, respectively. To calculate the continuous variable of total MET minutes a week, the self-reported duration (minutes) and frequency (days) of each of these PA categories is multiplied by the by the specified metric.

For the purposes of regression analyses, employment status was re-categorised as per Table S1

### Supplementary figures and tables

Figure S1: Timeline of lockdown restrictions in the United Kingdom in 2020

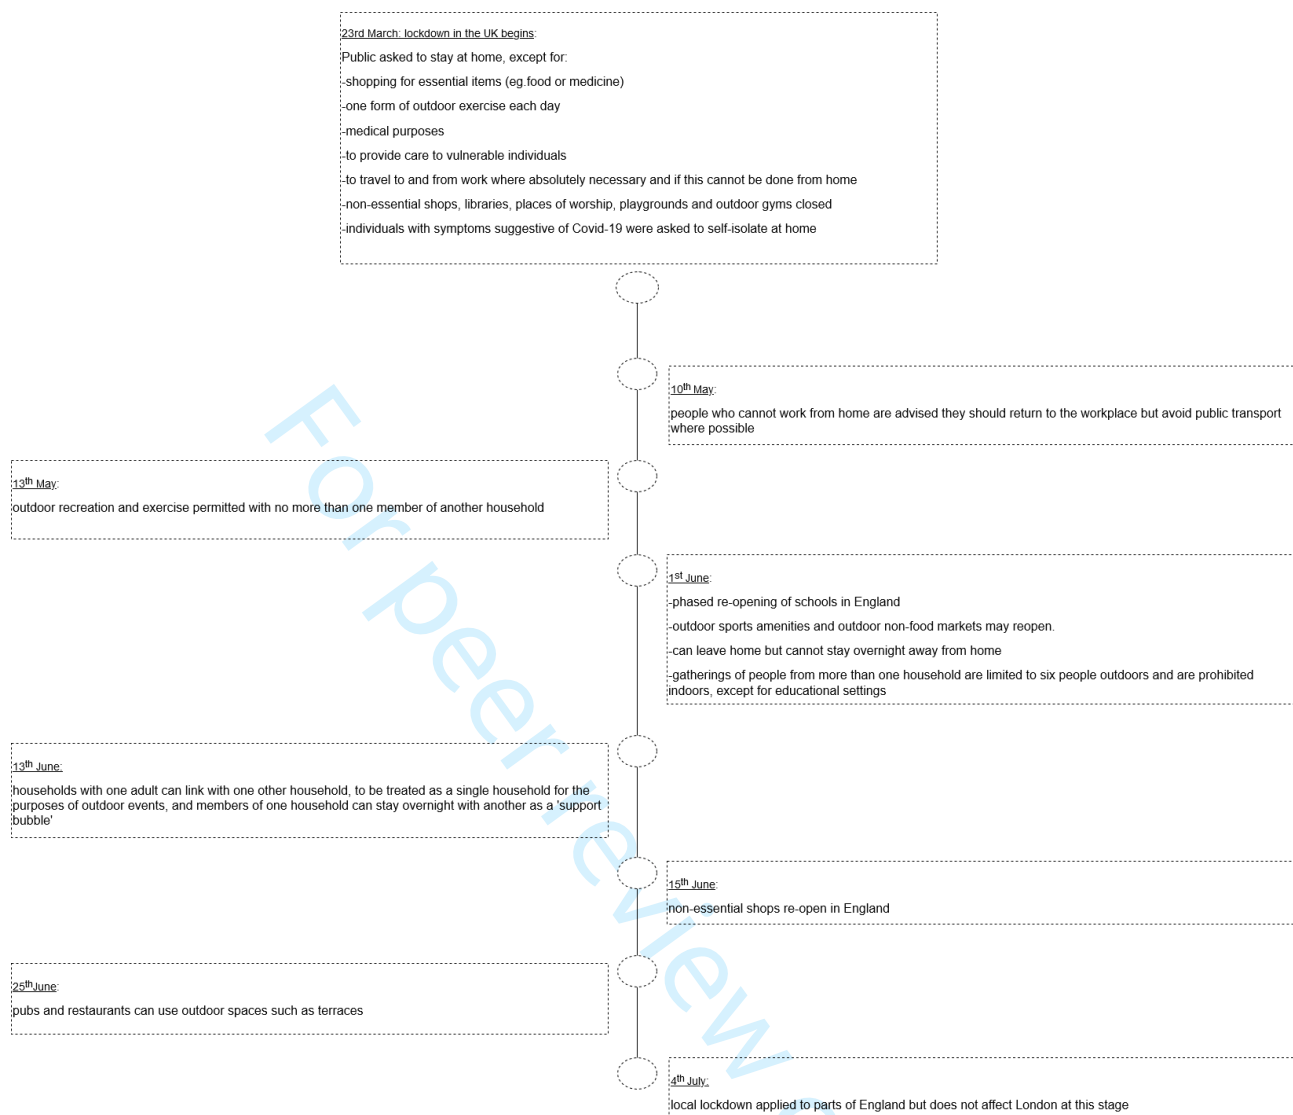

Gov.uk. UK Government COVID-19 guidance

Figure S2: Box-plot of distribution of MET minutes per week after introduction of lockdown by month of survey completion for 6,219 participants with completed IPAQ data

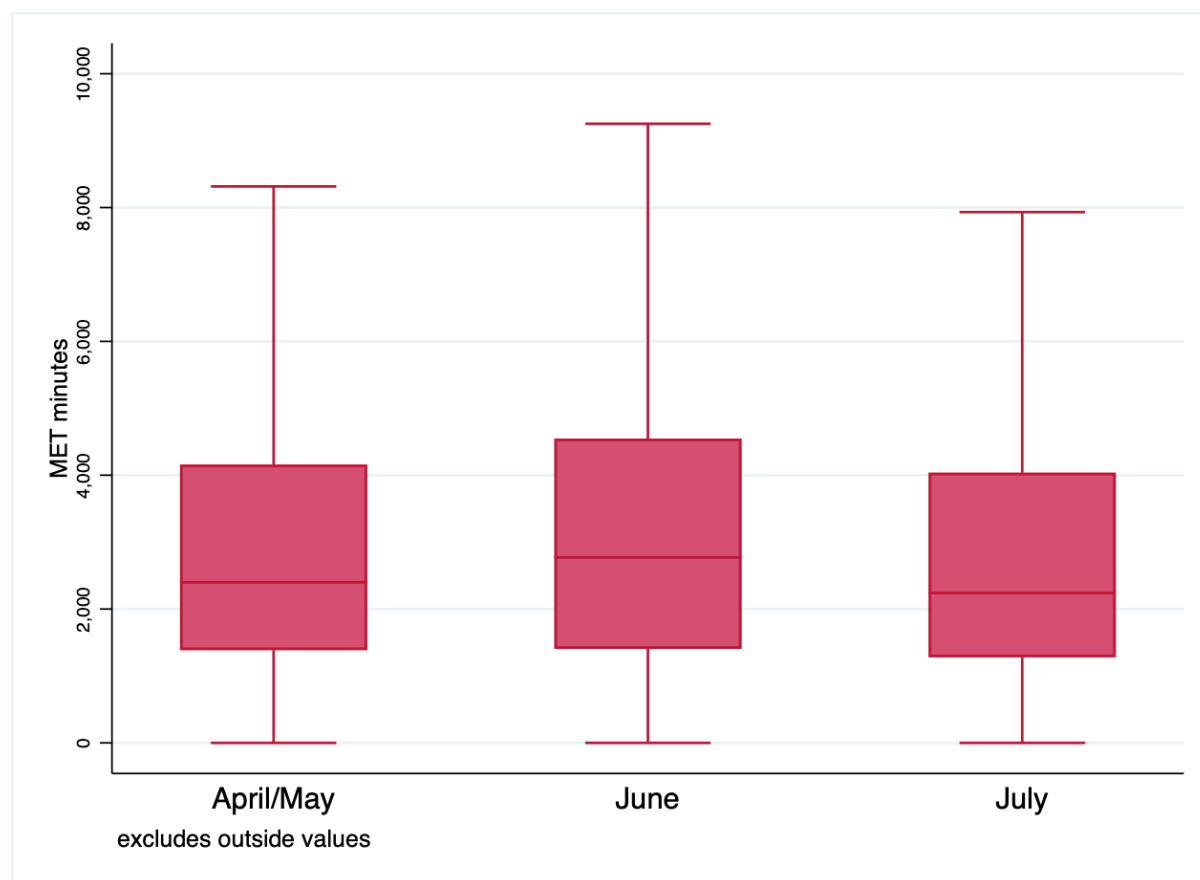

Table S1: Mean MET minutes after introduction of lockdown measures by month of survey completion

| Month      | Total | Percent | Mean MET minutes | p value <sup>¶</sup> |
|------------|-------|---------|------------------|----------------------|
| April/May* | 4975  | 80.0%   | 3139             |                      |
| June       | 994   | 16.0%   | 3470             | 0.0007               |
| July       | 250   | 4.0%    | 2967             |                      |

\* April (110) and May (4865) combined due to small numbers completed in April

<sup>¶</sup> p-value from linear regression models of MET minutes as dependent variable, against survey completion month as explanatory variable.

Table S2: Re-categorisation of employment status

| Recategorised variable | Original variable(s)                                                                                                                           |
|------------------------|------------------------------------------------------------------------------------------------------------------------------------------------|
| Retired                | Retired                                                                                                                                        |
| Employed               | A key worker<br>A student<br>Continuing to work in your usual job; at home<br>Continuing to work in your usual job and leave home for your job |
| Furloughed             | Furloughed                                                                                                                                     |
| Unemployed             | Had to close your business due to COVID-19<br>Lost my job due to the lockdown<br>Unemployed                                                    |
| Missing                | None of the above                                                                                                                              |

For peer review only



Figure S3: Causal diagram representing factors impacting on change in physical activity after lockdown

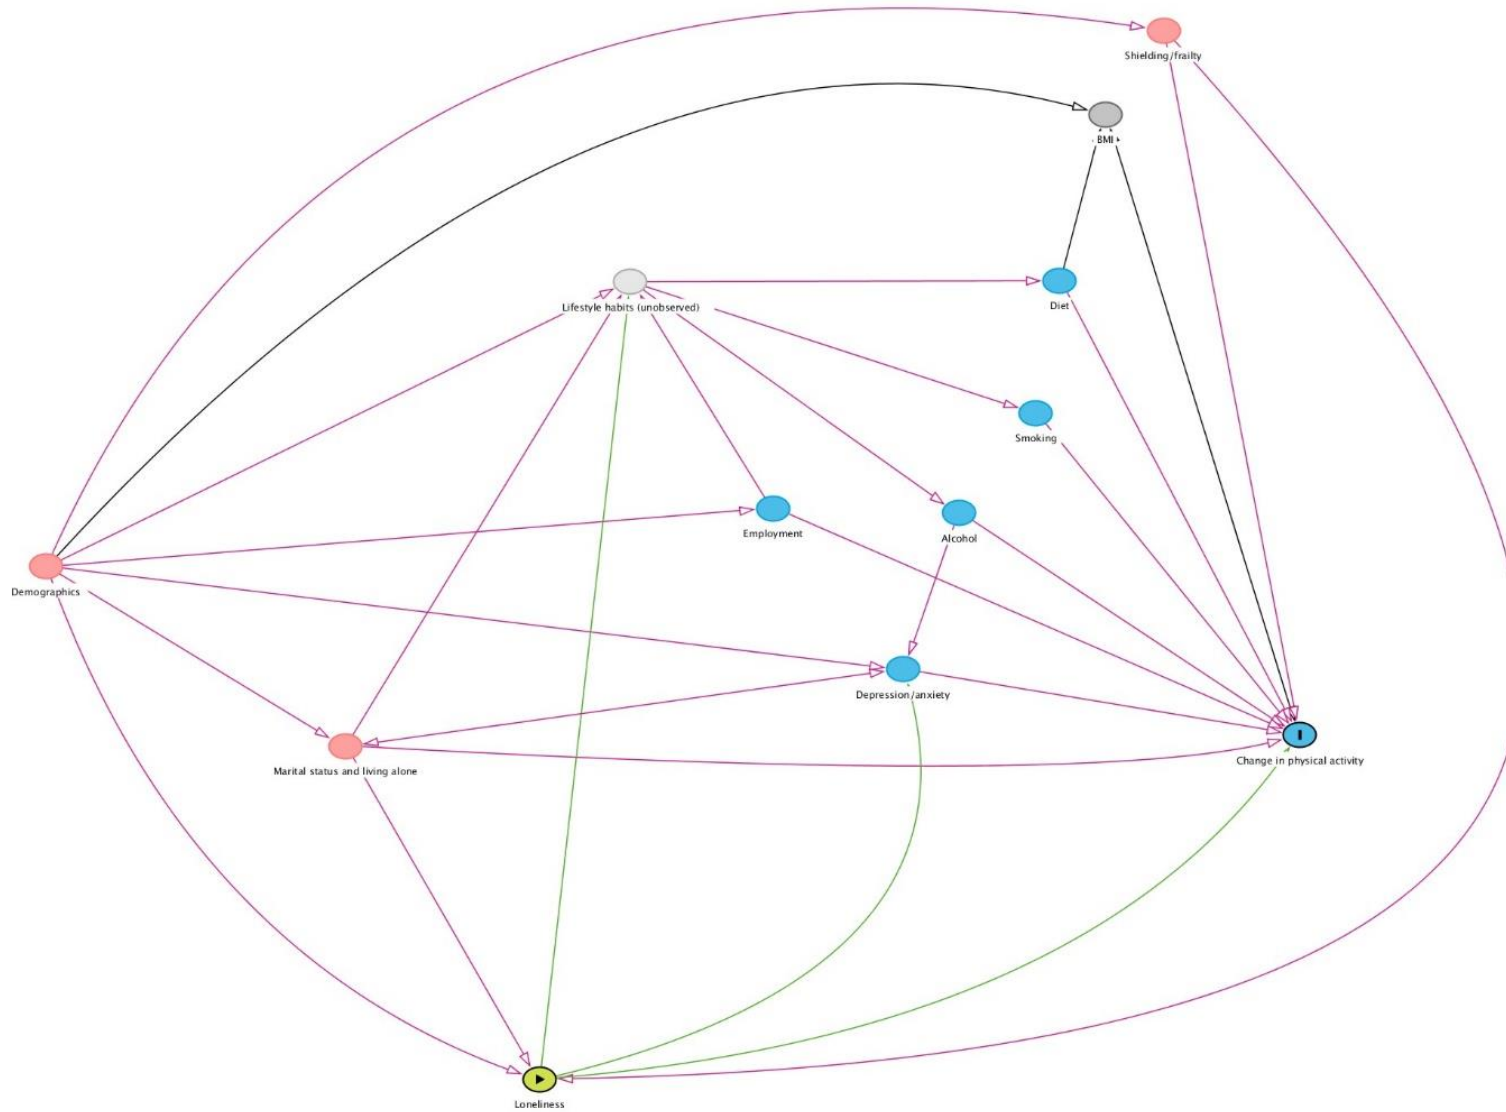

Figure S4: Box-plot of distribution of MET minutes per week before and after the introduction of lockdown for 6,219 participants with completed IPAQ data

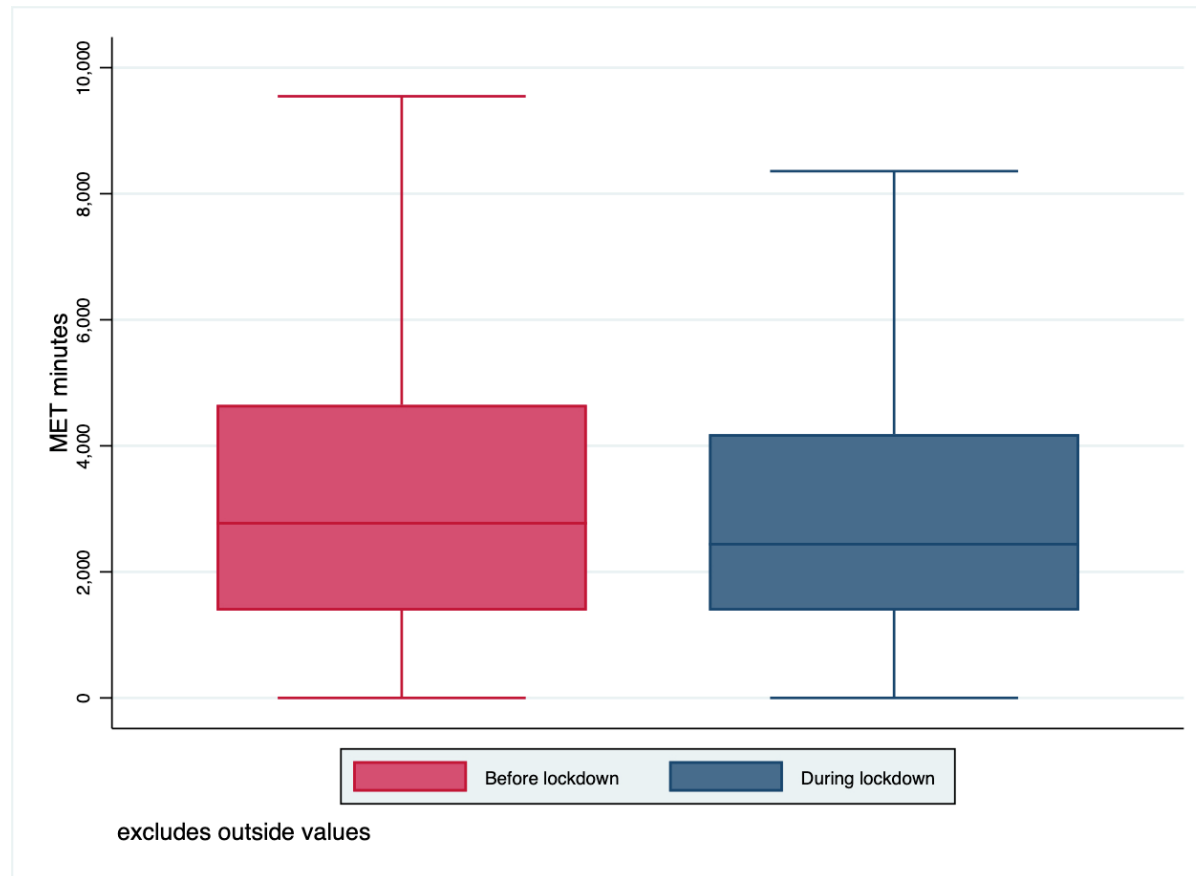

1  
2  
3  
4  
5  
6  
7  
8  
9  
10  
11  
12  
13  
14  
15  
16  
17  
18  
19  
20  
21  
22  
23  
24  
25  
26  
27  
28  
29  
30  
31  
32  
33  
34  
35  
36  
37  
38  
39  
40  
41  
42  
43  
44  
45  
46

Figure S5: Box-plot of distribution of MET minutes per week before introduction of lockdown by month of survey completion for 6,219 participants with completed IPAQ data

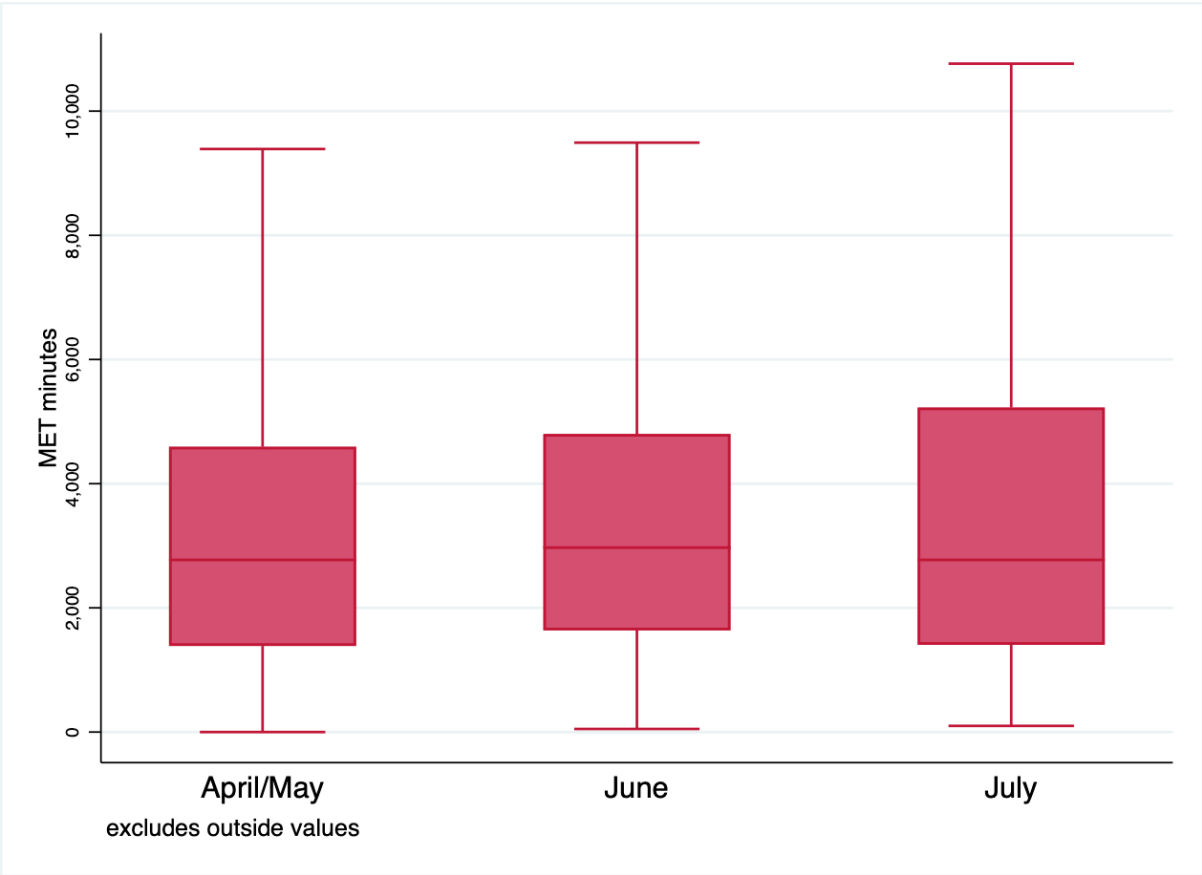

only

Linear regression models of MET minutes as dependent variable, against survey completion month as explanatory variable showed no significant association ( $p=0.1112$ ).

Table S3: Unadjusted associations in physical activity (MET minutes per week) after introduction of lockdown measures and change from before lockdown, from linear regression models. Note: negative values for change in activity indicate reduction after lockdown

| Predictor                             | Physical activity after lockdown (MET minutes/week) |                         |       |         | Change in physical activity from before lockdown (MET minutes/week) |                         |       |         |
|---------------------------------------|-----------------------------------------------------|-------------------------|-------|---------|---------------------------------------------------------------------|-------------------------|-------|---------|
|                                       | Mean                                                | 95% confidence interval |       | p value | Mean                                                                | 95% confidence interval |       | p value |
|                                       |                                                     | Lower                   | Upper |         |                                                                     | Lower                   | Upper |         |
| <b>Mean (whole cohort)</b>            | 3186                                                | 3120                    | 3253  | -       | -333                                                                | -396                    | -271  | -       |
| <b>Age (years)</b>                    |                                                     |                         |       |         |                                                                     |                         |       |         |
| 50-64                                 | 3341                                                | 3191                    | 3491  |         | -196                                                                | -338                    | -55   |         |
| 65-74                                 | 3201                                                | 3112                    | 3290  | <0.001  | -362                                                                | -446                    | -278  | 0.184   |
| 75-84                                 | 3092                                                | 2952                    | 3232  |         | -365                                                                | -497                    | -233  |         |
| 85+                                   | 2326                                                | 1863                    | 2790  |         | -503                                                                | -940                    | -66   |         |
| <b>Sex</b>                            |                                                     |                         |       |         |                                                                     |                         |       |         |
| Female                                | 3227                                                | 3138                    | 3317  | 0.180   | -450                                                                | -533                    | -366  | <0.001  |
| Male                                  | 3136                                                | 3036                    | 3235  |         | -189                                                                | -282                    | -95   |         |
| <b>Ethnicity</b>                      |                                                     |                         |       |         |                                                                     |                         |       |         |
| White                                 | 3196                                                | 3127                    | 3265  |         | -330                                                                | -394                    | -265  |         |
| Mixed/multiple ethnic groups          | 3346                                                | 2819                    | 3873  | 0.425   | -392                                                                | -887                    | 102   | 0.641   |
| Asian/Asian British                   | 2929                                                | 2530                    | 3327  |         | -326                                                                | -700                    | 48    |         |
| Black/African/Caribbean/Black British | 3351                                                | 2551                    | 4151  |         | 4                                                                   | -746                    | 754   |         |
| Other ethnic group                    | 2754                                                | 2099                    | 3410  |         | -740                                                                | -1355                   | -125  |         |
| <b>Body Mass Index category</b>       |                                                     |                         |       |         |                                                                     |                         |       |         |
| Underweight                           | 3815                                                | 3137                    | 4493  |         | -21                                                                 | -649                    | 607   |         |
| Healthy weight                        | 3569                                                | 3439                    | 3700  | <0.001  | -126                                                                | -247                    | -5    | 0.055   |
| Overweight                            | 3130                                                | 2959                    | 3300  |         | -363                                                                | -521                    | -204  |         |
| Obese                                 | 2590                                                | 2309                    | 2870  |         | -400                                                                | -659                    | -140  |         |

|                               |      |      |      |        |      |       |      |        |
|-------------------------------|------|------|------|--------|------|-------|------|--------|
| <b>Employment status</b>      |      |      |      |        |      |       |      |        |
| Employed                      | 3093 | 2950 | 3236 |        | -217 | -351  | -84  |        |
| Furloughed                    | 3496 | 3122 | 3870 | 0.118  | -488 | -838  | -139 | 0.101  |
| Unemployed                    | 3463 | 3031 | 3894 |        | -672 | -1076 | -268 |        |
| Retired                       | 3191 | 3111 | 3271 |        | -334 | -409  | -259 |        |
| <b>Marital status</b>         |      |      |      |        |      |       |      |        |
| Divorced/single/widowed       | 3026 | 2908 | 3143 | 0.001  | -540 | -650  | -430 | <0.001 |
| Living with a partner/married | 3262 | 3181 | 3342 |        | -236 | -312  | -161 |        |
| <b>Household</b>              |      |      |      |        |      |       |      |        |
| Not living alone              | 3262 | 3185 | 3340 | <0.001 | -240 | -313  | -168 | <0.001 |
| Living alone                  | 2983 | 2855 | 3110 |        | -582 | -702  | -463 |        |
| <b>Loneliness</b>             |      |      |      |        |      |       |      |        |
| Not ever                      | 3284 | 3188 | 3380 |        | -216 | -306  | -126 |        |
| Rarely                        | 3087 | 2951 | 3224 | 0.024  | -360 | -488  | -232 | <0.001 |
| Sometimes                     | 3155 | 3010 | 3300 |        | -481 | -617  | -345 |        |
| Often                         | 2938 | 2666 | 3210 |        | -762 | -1018 | -507 |        |
| <b>Shielding</b>              |      |      |      |        |      |       |      |        |
| Not shielding                 | 3273 | 3196 | 3350 | <0.001 | -243 | -315  | -171 | <0.001 |
| Shielding                     | 2942 | 2812 | 3072 |        | -588 | -710  | -466 |        |
| <b>Frailty</b>                |      |      |      |        |      |       |      |        |
| Robust                        | 3257 | 3183 | 3330 |        | -335 | -404  | -265 |        |
| Pre-frail                     | 2903 | 2746 | 3059 | <0.001 | -328 | -475  | -180 | 0.389  |
| Frail                         | 1952 | 1055 | 2849 |        | -925 | -1768 | -82  |        |
| <b>Alcohol drinker</b>        |      |      |      |        |      |       |      |        |
| No                            | 3044 | 2884 | 3203 | 0.054  | -485 | -634  | -335 | 0.029  |
| Yes                           | 3217 | 3143 | 3290 |        | -301 | -370  | -233 |        |
| <b>Smoker</b>                 |      |      |      |        |      |       |      |        |
| No                            | 3202 | 3135 | 3270 | 0.010  | -322 | -385  | -259 | 0.046  |
| Yes                           | 2696 | 2318 | 3074 |        | -689 | -1043 | -334 |        |

|                                                             |      |      |      |        |       |       |      |        |
|-------------------------------------------------------------|------|------|------|--------|-------|-------|------|--------|
| <b>Diet</b>                                                 |      |      |      |        |       |       |      |        |
| No change from usual - already had a healthy diet           | 3257 | 3183 | 3331 |        | -333  | -402  | -263 |        |
| My diet has become more healthy                             | 3314 | 3119 | 3509 | <0.001 | -55   | -238  | 129  | <0.001 |
| My diet was healthy before but has got worse since lockdown | 2523 | 2227 | 2818 |        | -890  | -1168 | -612 |        |
| No change from usual - my diet isn't very healthy           | 2009 | 1641 | 2377 |        | -479  | -825  | -133 |        |
| <b>HADS (depression score)</b>                              |      |      |      |        |       |       |      |        |
| Normal (0-7)                                                | 3195 | 3119 | 3270 | <0.001 | -293  | -365  | -222 | <0.001 |
| Borderline (8-10)                                           | 2787 | 2495 | 3079 |        | -676  | -953  | -399 |        |
| Abnormal (11-21)                                            | 2450 | 1971 | 2929 |        | -1450 | -1904 | -997 |        |
| <b>HADS (anxiety score)</b>                                 |      |      |      |        |       |       |      |        |
| Normal (0-7)                                                | 3123 | 3044 | 3201 | 0.150  | -312  | -386  | -237 | 0.004  |
| Borderline (8-10)                                           | 3343 | 3109 | 3577 |        | -348  | -570  | -125 |        |
| Abnormal (11-21)                                            | 3288 | 2971 | 3605 |        | -836  | -1137 | -535 |        |

\*HADS – Hospital Anxiety and Depression Score

Table S4: Results of multivariable linear regression models of physical activity after lockdown, adjusted for age, sex, ethnicity, month of survey completion and baseline physical activity. Data presented as mean MET minutes/week +/- 95% confidence interval compared to the reference group, with negative values indicating lower physical activity than the reference.

| Predictor                             | Physical activity after lockdown (MET minutes/week) | 95% confidence interval |       | p value | Number of observations |
|---------------------------------------|-----------------------------------------------------|-------------------------|-------|---------|------------------------|
|                                       |                                                     | Lower                   | Upper |         |                        |
| <b>Age (years)</b>                    |                                                     |                         |       |         |                        |
| 50-64 (reference)                     | -                                                   | -                       | -     |         |                        |
| 65-74                                 | -154                                                | -296                    | -12   | <0.001  | 6155                   |
| 75-84                                 | -213                                                | -380                    | -46   |         |                        |
| 85+                                   | -640                                                | -1034                   | -246  |         |                        |
| <b>Sex</b>                            |                                                     |                         |       |         |                        |
| Female (reference)                    | -                                                   | -                       | -     | 0.053   | 6155                   |
| Male                                  | 108                                                 | -1                      | 216   |         |                        |
| <b>Ethnicity</b>                      |                                                     |                         |       |         |                        |
| White (reference)                     | -                                                   | -                       | -     |         |                        |
| Mixed/multiple ethnic groups          | -14                                                 | -442                    | 415   | 0.517   | 6155                   |
| Asian/Asian British                   | -136                                                | -463                    | 191   |         |                        |
| Black/African/Caribbean/Black British | 248                                                 | -398                    | 894   |         |                        |
| Other ethnic group                    | -435                                                | -969                    | 100   |         |                        |
| <b>Body Mass Index category</b>       |                                                     |                         |       |         |                        |
| Underweight                           | 153                                                 | -411                    | 717   |         |                        |
| Healthy weight (reference)            | -                                                   | -                       | -     | 0.030   | 2987                   |
| Overweight                            | -341                                                | -518                    | -165  |         |                        |
| Obese                                 | -578                                                | -832                    | -324  |         |                        |
| <b>Employment status</b>              |                                                     |                         |       |         |                        |
| Employed (reference)                  | -                                                   | -                       | -     | 0.905   | 5958                   |
| Furloughed                            | 47                                                  | -278                    | 372   |         |                        |
| Unemployed                            | -110                                                | -480                    | 259   |         |                        |

|    |                                                               |      |       |      |             |
|----|---------------------------------------------------------------|------|-------|------|-------------|
| 1  |                                                               |      |       |      |             |
| 2  |                                                               |      |       |      |             |
| 3  | Retired                                                       | 99   | -48   | 246  |             |
| 4  | <b>Marital status</b>                                         |      |       |      |             |
| 5  | Divorced/single/widowed (reference)                           | -    | -     | -    | <0.001 6155 |
| 6  | Living with a partner/married                                 | 240  | 120   | 360  |             |
| 7  | <b>Household</b>                                              |      |       |      |             |
| 8  | Not living alone (reference)                                  | -    | -     | -    | <0.001 6155 |
| 9  | Living alone                                                  | -277 | -402  | -152 |             |
| 10 | <b>Loneliness</b>                                             |      |       |      |             |
| 11 | Not ever (reference)                                          | -    | -     | -    |             |
| 12 | Rarely                                                        | -161 | -297  | -25  | <0.001 6077 |
| 13 | Sometimes                                                     | -186 | -329  | -42  |             |
| 14 | Often                                                         | -452 | -688  | -217 |             |
| 15 | <b>Shielding</b>                                              |      |       |      |             |
| 16 | Not shielding (reference)                                     | -    | -     | -    | <0.001 6155 |
| 17 | Shielding                                                     | -290 | -417  | -163 |             |
| 18 | <b>Frailty</b>                                                |      |       |      |             |
| 19 | Robust (reference)                                            | -    | -     | -    | 0.005 6142  |
| 20 | Pre-frail                                                     | -160 | -301  | -19  |             |
| 21 | Frail                                                         | -926 | -1663 | -189 |             |
| 22 | <b>Alcohol drinker</b>                                        |      |       |      |             |
| 23 | No (reference)                                                | -    | -     | -    | 0.049 6155  |
| 24 | Yes                                                           | 145  | 1     | 289  |             |
| 25 | <b>Smoker</b>                                                 |      |       |      |             |
| 26 | No (reference)                                                | -    | -     | -    | 0.005 6155  |
| 27 | Yes                                                           | -451 | -762  | -140 |             |
| 28 | <b>Diet</b>                                                   |      |       |      |             |
| 29 | No change from usual - already had a healthy diet (reference) | -    | -     | -    | <0.001 6155 |
| 30 | My diet has become more healthy                               | 156  | -13   | 326  |             |
| 31 | My diet was healthy before but has got worse since lockdown   | -662 | -910  | -414 |             |
| 32 |                                                               |      |       |      |             |
| 33 |                                                               |      |       |      |             |
| 34 |                                                               |      |       |      |             |
| 35 |                                                               |      |       |      |             |
| 36 |                                                               |      |       |      |             |
| 37 |                                                               |      |       |      |             |
| 38 |                                                               |      |       |      |             |
| 39 |                                                               |      |       |      |             |
| 40 |                                                               |      |       |      |             |
| 41 |                                                               |      |       |      |             |
| 42 |                                                               |      |       |      |             |
| 43 |                                                               |      |       |      |             |
| 44 |                                                               |      |       |      |             |
| 45 |                                                               |      |       |      |             |
| 46 |                                                               |      |       |      |             |



1  
2  
3  
4  
5  
6  
7  
8  
9  
10  
11  
12  
13  
14  
15  
16  
17  
18  
19  
20  
21  
22  
23  
24  
25  
26  
27  
28  
29  
30  
31  
32  
33  
34  
35  
36  
37  
38  
39  
40  
41  
42  
43  
44  
45  
46

|                                                   |       |       |      |        |      |
|---------------------------------------------------|-------|-------|------|--------|------|
| No change from usual - my diet isn't very healthy | -667  | -975  | -359 |        |      |
| <b>HADS (depression score)</b>                    |       |       |      |        |      |
| Normal (0-7) (reference)                          | -     | -     | -    |        |      |
| Borderline (8-10)                                 | -408  | -654  | -163 | <0.001 | 5038 |
| Abnormal (11-21)                                  | -1007 | -1401 | -612 |        |      |
| <b>HADS (anxiety score)</b>                       |       |       |      |        |      |
| Normal (0-7) (reference)                          | -     | -     | -    |        |      |
| Borderline (8-10)                                 | 94    | -109  | 296  | 0.478  | 5038 |
| Abnormal (11-21)                                  | -220  | -486  | 47   |        |      |

HADS – Hospital Anxiety and Depression Score

For peer review only

Table S5: Multivariable linear regression model for physical activity after lockdown with loneliness, adjusted for age, sex, ethnicity, month of survey completion, baseline physical activity, living alone, marital status, shielding and frailty

| Predictor            | Physical activity after lockdown (MET minutes/week) | 95% confidence interval |       | p value | Number of observations |
|----------------------|-----------------------------------------------------|-------------------------|-------|---------|------------------------|
|                      |                                                     | Lower                   | Upper |         |                        |
| <b>Loneliness</b>    |                                                     |                         |       |         |                        |
| Not ever (reference) | -                                                   | -                       | -     | 0.007   | 6077                   |
| Rarely               | -127                                                | -265                    | 11    |         |                        |
| Sometimes            | -107                                                | -256                    | 42    |         |                        |
| Often                | -306                                                | -552                    | -60   |         |                        |

Adjusted: age, sex, ethnicity, month of survey completion, baseline physical activity, living alone, marital status, shielding, frailty

CHARIOT COVID-19 Rapid Response (CCRR) Study

Baseline Survey

Please answer all the questions in this survey before submitting it. Follow the prompts for those questions that are not applicable to you.

Symptoms

Q1. In the last week, have you had a cough?

<1> No

<2> Yes

Q2. In the last week, have you experienced unusual shortness of breath (difficulty breathing) compared to what's normal for you?

<1> No

<2> Yes, but it did not affect my normal activities

<3> Yes, it did affect my normal activities (eg walking short distances)

<4> Yes, even when I was sitting or lying down

Q3. In the last week, have you had a fever (feeling too hot) and did you take your temperature?

<1> I have NOT felt feverish

<2> I have felt feverish but did not check my temperature

<3> I felt feverish and my temperature was equal to, or BELOW 38 degrees Celcius

<4> I felt feverish and my temperature measured ABOVE 38 degrees Celcius

Q4. In the last week, have you experienced any of these other symptoms? Please do NOT include symptoms you experience on a regular basis due to a health condition you already know about. Please tick all that apply:

<1> Loss of sense of smell

<2> Loss of sense of taste

<3> Decrease in appetite (skipping meals)

<4> Diarrhoea

<5> Nauseas and/or Vomiting

<6> Abdominal pain/tummy ache

<7> Chills (feeling too cold)

<8> Difficulty sleeping

1  
2  
3  
4  
5  
6  
7  
8  
9  
10  
11  
12  
13  
14  
15  
16  
17  
18  
19  
20  
21  
22  
23  
24  
25  
26  
27  
28  
29  
30  
31  
32  
33  
34  
35  
36  
37  
38  
39  
40  
41  
42  
43  
44  
45  
46  
47  
48  
49  
50  
51  
52  
53  
54  
55  
56  
57  
58  
59  
60

<9> *Felt more tired than normal*

<10> *Severe Fatigue*

<11> *Sneezing*

<12> *Chest pain / tightness*

<13> *Tightness in chest*

<14> *Sore throat*

<15> *Hoarse voice*

<16> *Runny nose*

<17> *Blocked nose*

<18> *Sore eyes*

<19> *Itchy eyes*

<20> *Headache*

<21> *Joint pain / aches*

<22> *Dizziness*

<23> *Muscle pain/aches*

<99> *None of these*

*If you answered, 'None of these', please skip Q5 and go to Q6.*

*Q5. Thinking about the 14 days before your symptoms started, had you been in physical contact (within 2 metres / 6 feet) with someone who has a confirmed diagnosis of coronavirus (Covid-19), or someone with the following symptoms: dry cough, fever, loss of sense of smell, loss of sense of taste, shortness of breath or difficulty breathing.*

<1> *Yes, and it was an individual within my household*

<2> *Yes, and it was an individual from outside my household*

<3> *No, not that I am aware of*

*QX Since COVID-19 emerged in January, but before the official lockdown started on March 23rd 2020, which, if any of the following, have you experienced? Please do NOT include symptoms you experience on a regular basis due to a health condition you already know about. Please tick all that apply.*

<1> *New, continuous cough (coughing a lot for more than an hour, or have had 3 coughing episodes in 24 hours)*

<2> *High temperature (hot to touch on chest or back)*

<3> *Loss of sense of smell*

<4> *Loss of sense of taste*

<5> *Loss of appetite (skipping meals)*

<6> *Diarrhoea*

<7> *Vomiting*

<8> *Fatigue*

<9> *Sneezing*

<10> *Chest pain / tightness*

1  
2  
3 <11> Sore throat

4 <12> Runny nose

5 <13> Itchy eyes

6 <14> Headache

7 <15> Joint pain / aches

8 <16> Muscle or joint pain

9 <99> None of these

10  
11  
12  
13  
14  
15  
16 If you answered, 'None of these', go to Q6.

17  
18  
19 QXa Approximately when did you start experiencing these symptoms?

20  
21  
22 [DD/MM/YYYY]

23  
24  
25 QXb Approximately how long did these symptoms last?

26 [Days: ]

27  
28 QXX Thinking about the 14 days before your symptoms started, had you been in  
29 physical contact (within 2 metres / 6 feet) with someone who has a confirmed  
30 diagnosis of coronavirus (Covid-19), or someone with the following symptoms: dry  
31 cough, fever, loss of sense of smell, loss of sense of taste, shortness of breath or  
32 difficulty breathing.

33 <1> Yes, and it was an individual within my household

34 <2> Yes, and it was an individual from outside my household

35 <3> No, not that I am aware of

36  
37  
38 Q6 Now, thinking about the period prior to last week, but after the official lockdown  
39 started on 23rd March 2020, which, if any of the following, have you experienced?  
40 Please do NOT include symptoms you experience on a regular basis due to a health  
41 condition you already know about. Please tick all that apply.

42 <1> Fever (feeling too hot)

43 <2> New persistent cough

44 <3> Shortness of breath affecting normal activities

45 <4> Loss of sense of smell

46 <5> Loss of sense of taste

47 <6> Decrease in appetite (skipping meals)

48 <7> Diarrhoea

49 <8> Nauseas and/or vomiting

50 <9> Abdominal pain/tummy ache

51 <10> Chills (feeling too cold)

52 <11> Difficulty sleeping

53 <12> Felt more tired than normal

54 <13> Severe fatigue

1  
2  
3  
4 <14> Sneezing

5 <15> Chest pain

6  
7 <16> Tightness in chest

8 <17> Sore throat

9  
10 <18> Hoarse throat

11 <19> Runny nose

12 <20> Blocked nose

13 <21> Sore eyes

14 <22> Itchy eyes

15 <23> Headache

16  
17 <24> Dizziness

18 <25> Joint pain / aches

19 <26> Muscle pain/aches

20  
21  
22  
23  
24  
25  
26  
27  
28  
29  
30  
31  
32  
33  
34  
35  
36  
37  
38  
39  
40  
41  
42  
43  
44  
45  
46  
47  
48  
49  
50  
51  
52  
53  
54  
55  
56  
57  
58  
59  
60  
If you answered, 'None of these', go to Q8.

Q6a Approximately when did you start experiencing these symptoms?

[DD/MM/YYYY]

Q6b Approximately how long did these symptoms last?

[Days: ]

Q7 Thinking about the 14 days before your symptoms started, had you been in physical contact (within 2 metres / 6 feet) with someone who has a confirmed diagnosis of coronavirus (Covid-19), or someone with the following symptoms: dry cough, fever, loss of sense of smell, loss of sense of taste, shortness of breath or difficulty breathing.

<1> Yes, and it was an individual within my household

<2> Yes, and it was an individual from outside my household

<3> No, not that I am aware of

Q8 Have you or anyone in your house been tested for coronavirus? Please tick all that apply

<1> No testing

<2> I have not been tested -- BUT I think I have already had coronavirus and recovered

<3> I was tested - positive result

<4> I was tested - awaiting result

<5> I was tested - negative result

<6> Household member tested - positive result

<7> Household member tested - awaiting result

1  
2  
3  
4 <8> Household member tested - negative result  
5  
6  
7

8 Q9 In the last week, has anyone in your household had a new cough or fever?  
9

10 Not applicable  
11

12  
13 <1> No

14 <2> Yes  
15  
16  
17

18  
19  
20  
21 Q10 Have you had any healthcare contact since the lockdown started? Please tick  
22 all that apply  
23

24  
25 <1> No

26 <2> Yes - remote appointment with my GP (phone/video)

27 <3> Yes - I attended my GP practice for an appointment

28 <4> Yes - remote appointment with hospital (phone/video)

29 <5> Yes - I attended hospital for an appointment

30 <6> Yes - attended Accident and Emergency

31 <7> Yes -- I was admitted to hospital (not because of coronavirus)

32 <8> Yes -- I was admitted to hospital with symptoms of coronavirus

33 <9> Yes – One or more remote calls to 111- home visit by ambulance  
34  
35  
36  
37  
38  
39

40 Q11. In the last week, have you been taking any medication for new symptoms?  
41

42 <1> No

43 <2> Yes

44 <3> If yes, what medication?  
45  
46  
47  
48  
49

50 Underlying conditions

51 For the following question, please remember that your answers are always treated  
52 confidentially and are never analysed individually. We have provided you with a  
53 "Prefer not to say" option if you would rather not share your experiences.  
54

55 Q12 Which, if any, of the following chronic health conditions have you been  
56 diagnosed with? (Please select all that apply. If you do not currently have a chronic  
57 health condition, please select the 'None of these' option)

58 <1> Arthritis

59 <2> Asthma  
60

- 1  
2  
3  
4 <3> *My doctor has told me I have severe asthma*  
5  
6 <4> *I am having cancer treatment*  
7  
8 <5> *Blood or bone marrow cancer, such as leukaemia*  
9  
10 <6> *Cystic fibrosis*  
11  
12 <7> *Chronic obstructive pulmonary disease (COPD)*  
13  
14 <8> *Diabetes*  
15  
16 <9> *Epilepsy*  
17  
18 <10> *Heart disease*  
19  
20 <11> *High blood pressure*  
21  
22 <12> *High cholesterol*  
23  
24 <13> *HIV/ AIDS*  
25  
26 <14> *Mental health condition*  
27  
28 <15> *Multiple Sclerosis*  
29  
30 <16> *I have had an organ transplant*  
31  
32 <17> *I have a condition that makes me much more likely to get infections*  
33  
34 <18> *I am taking medicine that weakens my immune system*  
35  
36 <19> *Dementia, Parkinson's or other neurological disease*  
37  
38 <98> *Prefer not to say*  
39  
40 <99> *None of these*  
41  
42  
43  
44  
45  
46  
47  
48  
49  
50  
51  
52  
53  
54  
55  
56  
57  
58  
59  
60

*Contacts*

[Q13 *What is your date of birth:*

*Date ..... ]*

Q14 *What is your sex:*

<1> *Female*

<2> *Male*

<3> *Prefer not to say*

Q15 *What ethnic group best describes you? Please select one option only.*

<1>

*English / Welsh /  
Scottish / Northern  
Irish / British*

<11>

*Bangladeshi*



1  
2  
3  
4 <2>  
5 *Irish*  
6 <12>  
7  
8 *Chinese*  
9 <3>  
10  
11 *Gypsy or Irish*  
12 *Traveller*  
13 <13>  
14  
15 *Any other Asian*  
16 *background*  
17 <4>  
18  
19 *Any other White*  
20 *background*  
21 <14>  
22  
23 *African*  
24 <5>  
25  
26 *White and Black*  
27 *Caribbean*  
28 <15>  
29  
30 *Caribbean*  
31 <6>  
32  
33 *White and Black*  
34 *African*  
35 <16>  
36  
37 *Any other Black /*  
38 *African /*  
39 *Caribbean*  
40 *background*  
41 <7>  
42  
43 *White and Asian*  
44 <17>  
45  
46 *Arab*  
47 <8>  
48  
49 *Any other Mixed /*  
50 *Multiple ethnic*  
51 *background*  
52 <18 fixed>  
53  
54 *Any other ethnic*  
55 *group*  
56 <9>  
57  
58 *Indian*  
59 <19 fixed>  
60  
61 *Prefer not to say*

1  
2  
3  
4  
5  
6  
7  
8  
9  
10  
11  
12  
13  
14  
15  
16  
17  
18  
19  
20  
21  
22  
23  
24  
25  
26  
27  
28  
29  
30  
31  
32  
33  
34  
35  
36  
37  
38  
39  
40  
41  
42  
43  
44  
45  
46  
47  
48  
49  
50  
51  
52  
53  
54  
55  
56  
57  
58  
59  
60

<10>

Pakistani

Q16 Who else is CURRENTLY living in your household? Please tick all that apply

<1> I live by myself

<2> I live with my partner

<3> I live with my child/children aged under 18

<4> I live with my child/children aged over 18

<5> I live with family members other than partner / children

<6> I live with housemates

16a Where are you living during lockdown?

<1> My usual home

<2> not my usual home – keeping away from household members who are at high risk coronavirus

<3> Not my usual home – other reason

Q17 How many people, including yourself, are there in your household? Please include both adults and children. If you live alone, enter 1

Number

Q17a

For each household member ask age (in years) and sex

The following questions will ask you to report on how many people you have come into contact with both inside and outside of your household.

A contact is defined as either:

- Direct skin-to-skin physical contact (e.g. kiss/embrace/handshake)
- Face-to-face conversation with another person which lasts over 3 mins, within 2m distance
- Being within 2m distance from another individual for over 5 mins

Note: if you contacted the same person in different times through the day, they should be counted once.

Q18 How many different people did you have contact with, both inside your household and while outside (after having left your household) in the past 7 days?

1  
2  
3 Enter 0 if you had no contacts in the last 7 days

4 1. (enter number)

5  
6 2. Don't know

7  
8  
9 Q19a Among the contacts you had, just from yesterday, both inside your household  
10 and while outside (after having left your household), how many belonged to the  
11 following age groups?

12  
13  
14  
15 No contacts yesterday

16  
17  
18 0 to <10 years old (enter number)

19  
20  
21 10 to <20 years old (enter number)

22  
23  
24 20 to <30 years old (enter number)

25  
26  
27 30 to <40 years old (enter number)

28  
29  
30 40 to <50 years old (enter number)

31  
32  
33 50 to <60 years old (enter number)

34  
35  
36 60 to <70 years old (enter number)

37  
38  
39 70 to <80 years old (enter number)

40  
41  
42 80 to <90 years old (enter number)

43  
44  
45 90+ years old (enter number)

46  
47 12. Don't know

48  
49  
50 IF Q18 is NOT=0

51  
52  
53  
54 Q19b How many different people did you come in contact with in the past 7 days  
55 outside of your household?

56  
57  
58 Enter 0 if you had no contacts in the last 7 days outside of your household

59  
60 1. (enter number)

1  
2  
3  
4 2. Don't know  
5

6  
7 IF Q19b is NOT=0  
8  
9

10 Q19c Among the contacts you had, just from yesterday, outside your household,  
11 how many belonged to the following age groups?  
12

13  
14 No contacts yesterday  
15

16  
17 0 to <10 years old (enter number)  
18

19  
20 10 to <20 years old (enter number)  
21

22  
23 20 to <30 years old (enter number)  
24

25  
26 30 to <40 years old (enter number)  
27

28  
29 40 to <50 years old (enter number)  
30

31  
32 50 to <60 years old (enter number)  
33

34  
35 60 to <70 years old (enter number)  
36

37  
38 70 to <80 years old (enter number)  
39

40  
41 80 to <90 years old (enter number)  
42

43  
44 90+ years old (enter number)  
45

46  
47 Don't know  
48

49  
50  
51 IF Q19b is NOT=0  
52

53  
54 Q19c Among the contacts that you have had in the past 7 days outside your  
55 household, how many contacts occurred at work?  
56

57  
58 Enter 0 if you had no contacts in the last 7 days outside of your household that  
59 occurred at work  
60

1  
2  
3  
4  
5 1. (enter number)  
6  
7

8 2. Don't know  
9

10 For the following questions please answer according to the following terms;

11 Self-isolation – refers to those who are symptomatic and self-isolating for 7  
12 days from when symptoms started

13 Shielding – those in specific vulnerable groups staying at home for 12 weeks.  
14 These groups would include those with underlying chronic health conditions:  
15 cancers, respiratory disease, on immunosuppressants, those at increased risk  
16 of infection or pregnant women with heart disease and/or those advised by the  
17 NHS of their extremely vulnerable status'.  
18

19 Household quarantine – 14-day quarantine period for all members of a  
20 household from the first day of symptom onset in first case in that household

21 Social distancing and isolation

22 Q20 Are you currently in self-isolation?

23 <1> Yes

24 <2> No

25 If yes, for how long: ...days

26 Q21 Are you currently shielding as per government guidelines for vulnerable groups?

27 <1> Yes

28 <2> No

29 Q22 Have you moved residence recently due to the pandemic? Y/N

30 Q23. Are you single, married, living with a partner, divorced, widowed?

31 Q24. Are you

32 <1> Continuing to work in your usual job; at home

33 <2> Continuing to work in your usual job and leave home for your job <3>  
34 volunteering in response to the COVID pandemic

35 <4> a key worker

36 <5> unemployed

37 <6> retired

38 <7> furloughed (put on leave, still getting paid)

39 <8> had to close your business due to COVID-19

40 <9> lost my job due to the lockdown

41 <10> a student

42 <99> None of the above

43 Q25. How often are you now contacting friends/family members remotely  
44 (Skype/Zoom/Mobile/landline phone etc)?

45 Several times per day, once a day, 2-3 x per week, 4-6 x per week, once a week,  
46 less than once a week?  
47  
48  
49  
50  
51  
52  
53  
54  
55  
56  
57  
58  
59  
60

1  
2  
3  
4 Q26 Overall, how are your relationships with other members of your household?  
5

6 Not applicable

7 1 = worst

8 2

9 3

10 4

11 5

12 6

13 7

14 8

15 9

16 10 = best

17  
18  
19  
20  
21  
22  
23  
24 Q27 If you are leaving your home, what activity is this for? Please tick all that apply

25  
26  
27 <1> I am not leaving my home

28 <2> Commute to work

29 <3> Essential shopping

30 <4> Exercise

31  
32  
33 <5> Other

34  
35  
36  
37 Q28 Have you or anyone in your household received a letter or message informing  
38 you that you are in the population at 'high risk' from coronavirus? Please tick all that  
39 apply.

40  
41 <1> No - Neither myself or anyone in my household is at 'high risk'

42 <2> No - but I think I should have

43 <3> No - but someone in my household is at 'high risk'

44 <4> Yes - letter about me

45 <5> Yes - letter about someone in my household

46  
47  
48  
49  
50  
51 Health behaviours: dietary, alcohol and smoking

52 Q29 Do you drink alcohol?

53 <1> Yes (If yes trigger sub-questions)

54 Drinking less since lockdown

55 Drinking the same amount since lockdown

56 Drinking more since lockdown

57  
58  
59 How many units do you consume per week:...units  
60

1  
2  
3  
4 (half pint/ 300ml = approx. 1 unit, 175ml glass wine= approx. 2 units)  
5  
6

7 <2> No (If no, trigger sub-questions)

8 I never drink alcohol

9  
10 I had already stopped drinking alcohol before lockdown

11 I stopped drinking alcohol when lockdown started  
12  
13

14 Q30 Do you smoke?

15 <1> Yes (if yes, trigger sub-questions)

16 Smoking less since lockdown

17 Smoking the same amount since lockdown

18 Smoking more since lockdown

19 If yes, how many cigarettes or roll-ups do you smoke per day:...

20 <2> No (if now, trigger sub-questions)

21 I never smoked

22  
23 I had already stopped smoking before lockdown

24 I stopped smoking since the lockdown  
25  
26  
27  
28  
29  
30  
31

32 Q30a) Has there been a change in your vaping (e-cigarettes) status since the  
33 coronavirus lockdown?  
34  
35

36 <1> I never vaped

37 <2> I had already stopped vaping before

38 <3> I stopped vaping since the lockdown

39 <4> Vaping less

40 <5> Vaping the same amount

41 <6> Vaping more  
42  
43  
44  
45  
46

47 Q31 Since the lockdown, are you managing to keep a healthy diet, for example,  
48 eating fresh fruits and vegetables?  
49

50 <1> No change from usual - already had a healthy diet

51 <2> No change from usual - my diet isn't very healthy

52 <3> My diet has become more healthy

53 <4> My diet was healthy before but has got worse since lockdown  
54  
55  
56  
57

58 Q32 On average, how many portions (or servings) of fruit and vegetables do you eat  
59 per day?.....  
60

1  
2  
3 - One portion is typically 80g, 3 heaped tablespoons of cooked veg or 1 cereal  
4 bowl of mixed salad  
5 - Three heaped tablespoons of beans and other pulse vegetables, such as  
6 kidney beans, lentils and chickpeas, count as 1 portion.  
7 - The following starchy vegetables should not be included – potatoes, yams,  
8 cassava and plantain

9 Q32a Have you ever skipped meals due to difficulties accessing food as a result of  
10 COVID-19?

11 Yes /No

12 If yes:

13 How many meals per week, on average have you missed?

14 <1> 1-3 meals per week

15 <2> 4-6 meals per week

16 <4> 7-9 meals per week

17 <5> 10 or more meals per week

18 Biometric data: height and weight

19 Q33 Please enter your weight: Kg

20 Q34 Please enter your height: ...cm

21 Q35 Do you have a recent (from the past week) blood pressure? \_\_\_\_ mm/Hg

22 Current Physical activity: International Physical Activity Questionnaire

23 We are interested in finding out about the kinds of physical activities that people do  
24 as part of their everyday lives. The questions will ask you about the time you spent  
25 being physically active in the last 7 days. Please answer each question even if you  
26 do not consider yourself to be an active person. Please think about the activities you  
27 do at work, as part of your house and garden work, to get from place to place, and in  
28 your spare time for recreation, exercise or sport.

29 Think about all the vigorous activities that you did in the last 7 days. Vigorous  
30 physical activities refer to activities that take hard physical effort and make you  
31 breathe much harder than normal. Think only about those physical activities that you  
32 did for at least 10 minutes at a time.

33 Q36: During the last 7 days, on how many days did you do vigorous physical  
34 activities like heavy lifting, digging, aerobics, or fast bicycling?

35 \_\_\_\_ days per week

36 If no vigorous physical activities, skip to question 38

37 Q37: How much time did you usually spend doing vigorous physical activities on  
38 one of those days? If you only exercised in hours or minutes, please input a '0' in the  
39 non-applicable field.

40 \_\_\_\_ hours per day



1  
2  
3  
4 \_\_\_\_\_ minutes per day  
5  
6

7 *Think about all the moderate activities that you did in the last 7 days. Moderate*  
8 *activities refer to activities that take moderate physical effort and make you breathe*  
9 *somewhat harder than normal. Think only about those physical activities that you*  
10 *did for at least 10 minutes at a time.*

11 Q38: *During the last 7 days, on how many days did you do moderate physical*  
12 *activities like carrying light loads or bicycling at a regular pace? Do not include*  
13 *walking.*

14  
15 \_\_\_\_\_ days per week  
16

17  
18 *If no moderate physical activities, skip to question 40*  
19

20  
21 Q39: *How much time did you usually spend doing moderate physical activities on*  
22 *one of those days? If you only exercised in hours or minutes, please input a '0' in the*  
23 *non-applicable field.*

24  
25 \_\_\_\_\_ hours per day  
26

27 \_\_\_\_\_ minutes per day  
28  
29

30  
31 *Think about the time you spent walking in the last 7 days. This includes at work*  
32 *and at home, walking to travel from place to place, and any other walking that you*  
33 *have done solely for recreation, sport, exercise, or leisure.*

34  
35 Q40: *During the last 7 days, on how many days did you walk for at least 10 minutes*  
36 *at a time?*

37  
38  
39 \_\_\_\_\_ days per week  
40

41  
42  
43 *No walking, skip to question 42*  
44

45  
46 Q41: *How much time did you usually spend walking on one of those days? If you*  
47 *only exercised in hours or minutes, please input a '0' in the non-applicable field.*

48  
49 \_\_\_\_\_ hours per day  
50

51 \_\_\_\_\_ minutes per day  
52  
53

54 *The last question is about the time you spent sitting on weekdays during the last 7*  
55 *days. Include time spent at work, at home, while doing course work and during*  
56 *leisure time. This may include time spent sitting at a desk, reading, or sitting or lying*  
57 *down to watch television.*

58  
59 Q42: *During the last 7 days, how much time did you spend sitting on a week day?*  
60

1  
2  
3 If you only exercised in hours or minutes, please input a '0' in the non-applicable  
4 field.

5  
6  
7 \_\_\_\_\_ hours per day

8 \_\_\_\_\_ minutes per day  
9

10  
11 *Previous Physical activity: International Physical Activity Questionnaire*

12  
13 *These questions will ask you about the time you spent being physically active in the*  
14 *7 days prior to implementation of social distancing measures (please use first*  
15 *week of March 2020). Please answer each question even if you do not consider*  
16 *yourself to be an active person. Please think about the activities you do at work, as*  
17 *part of your house and garden work, to get from place to place, and in your spare*  
18 *time for recreation, exercise or sport.*

19 *Think about all the vigorous activities that you did in the 7 days prior to social*  
20 *distancing measures. Vigorous physical activities refer to activities that take hard*  
21 *physical effort and make you breathe much harder than normal. Think only about*  
22 *those physical activities that you did for at least 10 minutes at a time.*

23  
24  
25 *Q43: During the 7 days prior to social distancing measures (please use first week*  
26 *of March 2020), on how many days did you do vigorous physical activities like*  
27 *heavy lifting, digging, aerobics, or fast bicycling?*

28  
29 \_\_\_\_\_ days per week  
30

31  
32 *If no vigorous physical activities, skip to question 45*

33  
34  
35 *Q44: How much time did you usually spend doing vigorous physical activities on*  
36 *one of those days? If you only exercised in hours or minutes, please input a '0' in the*  
37 *non-applicable field.*

38  
39 \_\_\_\_\_ hours per day

40 \_\_\_\_\_ minutes per day  
41  
42

43  
44  
45 *Think about all the moderate activities that you did in the 7 days prior to social*  
46 *distancing measures. Moderate activities refer to activities that take moderate*  
47 *physical effort and make you breathe somewhat harder than normal. Think only*  
48 *about those physical activities that you did for at least 10 minutes at a time.*

49  
50 *Q45: During the 7 days prior to social distancing measures (please use first week*  
51 *of March 2020), on how many days did you do moderate physical activities like*  
52 *carrying light loads or bicycling at a regular pace? Do not include walking.*

53  
54  
55 \_\_\_\_\_ days per week  
56  
57

58  
59 *If no moderate physical activities, skip to question 47*  
60

1  
2  
3  
4  
5  
6 Q46: How much time did you usually spend doing moderate physical activities on  
7 one of those days? If you only exercised in hours or minutes, please input a '0' in the  
8 non-applicable field.

9  
10 \_\_\_\_\_ hours per day

11 \_\_\_\_\_ minutes per day  
12  
13  
14  
15

16 Think about the time you spent walking in the 7 days prior to social distancing  
17 measures. This includes at work and at home, walking to travel from place to place,  
18 and any other walking that you have done solely for recreation, sport, exercise, or  
19 leisure.

20  
21  
22 Q47: During the 7 days prior to social distancing measures (please use first week  
23 of March 2020), on how many days did you walk for at least 10 minutes at a time?  
24

25 \_\_\_\_\_ days per week  
26  
27

28 No walking, skip to question 49  
29

30  
31  
32 Q48: How much time did you usually spend walking on one of those days? If you  
33 only exercised in hours or minutes, please input a '0' in the non-applicable field.  
34

35 \_\_\_\_\_ hours per day

36 \_\_\_\_\_ minutes per day  
37  
38  
39  
40  
41  
42  
43  
44

45 The last question is about the time you spent sitting on weekdays during 7 days  
46 prior to social distancing measures. Include time spent at work, at home, while  
47 doing course work and during leisure time. This may include time spent sitting at a  
48 desk, reading, or sitting or lying down to watch television.

49  
50  
51 Q49: During the 7 days prior to social distancing measures (please use first week  
52 of March 2020), how much time did you spend sitting on a week day? If you only  
53 exercised in hours or minutes, please input a '0' in the non-applicable field.  
54

55 \_\_\_\_\_ hours per day

56 \_\_\_\_\_ minutes per day  
57  
58  
59  
60

Frailty Questionnaire:

Q50: Are you fatigued?

<1> Yes

<2> No

Q51: Can you walk up one flight of stairs?

<1> Yes

<2> No

Q52: Can you walk around the block?

<1> Yes

<2> No

Q53: Do you have more than 5 illnesses?

<1> Yes

<2> No

Q54: Have you lost more than 5% of your weight in the past 6 months?

<1> Yes

<2> No

Qx Have you had a fall during the COVID lockdown period?

Yes/No

If yes:

What actions were taken (select multiple where applicable):

a) No follow-up required, I did not hurt myself

b) Pain medication

c) A hospital and/or GP appointment

d) A follow-up X-ray

e) Sling/plaster cast for a fracture

1  
2  
3  
4 f) *Surgery*  
5  
6  
7  
8  
9  
10  
11  
12  
13  
14  
15  
16  
17  
18  
19

20 *Mood*  
21

22 a) *Tick the box beside the reply that is closest to how you have been feeling*  
23 *in the past week.*

24 *Don't take too long over you replies: your immediate response is best.*  
25

26 *Tick here*  
27

28 1.  
29

30 *Tick here*  
31

32 8.  
33

34 *I feel tense or 'wound up':*  
35

36 *I feel as if I am slowed down:*  
37

38  
39  
40 *Most of the time*  
41

42  
43 *Nearly all the time*  
44

45  
46 *A lot of the time*  
47

48  
49 *Very often*  
50

51  
52 *From time to time, occasionally*  
53

54  
55 *Sometimes*  
56

57  
58 *Not at all*  
59  
60

For peer review only

1  
2  
3  
4 *Not at all*

5  
6  
7 2.

8  
9  
10 9.

11  
12  
13 *I still enjoy the things I used to*  
14 *enjoy:*

15  
16  
17 *I get a sort of frightened feeling like*  
18 *'butterflies' in the stomach:*

19  
20  
21 *Definitely as much*

22  
23  
24 *Not at all*

25  
26  
27 *Not quite so much*

28  
29  
30 *Occasionally*

31  
32  
33 *Only a little*

34  
35  
36 *Quite Often*

37  
38  
39 *Hardly at all*

40  
41  
42 *Very Often*

43  
44  
45  
46 3.

47  
48  
49 10.

50  
51  
52 *I get a sort of frightened feeling as if*  
53 *something awful is about to*

54 *happen:*

55  
56  
57  
58  
59 *I have lost interest in my appearance:*  
60

1  
2  
3  
4  
5 *Very definitely and quite badly*  
6  
7

8 *Definitely*  
9

10  
11 *Yes, but not too badly*  
12

13  
14 *I don't take as much care as I should*  
15

16  
17 *A little, but it doesn't worry me*  
18

19  
20 *I may not take quite as much care*  
21

22  
23 *Not at all*  
24

25  
26 *I take just as much care as ever*  
27

28  
29 4.  
30

31  
32 11.  
33

34  
35 *I can laugh and see the funny side*  
36

37 *of things:*  
38

39  
40 *I feel restless as I have to be on the*  
41

42 *move:*  
43

44  
45 *As much as I always could*  
46

47 *Very much indeed*  
48

49  
50 *Not quite so much now*  
51

52  
53 *Quite a lot*  
54

55  
56  
57 *Definitely not so much now*  
58

59  
60 *Not very much*

1  
2  
3  
4  
5 *Not at all*  
6  
7

8 *Not at all*  
9

10  
11 5.  
12

13  
14  
15 12.  
16

17  
18 *Worrying thoughts go through my*  
19 *mind:*  
20

21  
22 *I look forward with enjoyment to*  
23 *things:*  
24

25  
26  
27 *A great deal of the time*  
28

29  
30 *As much as I ever did*  
31

32  
33 *A lot of the time*  
34

35  
36 *Rather less than I used to*  
37

38  
39 *From time to time, but not too often*  
40

41  
42 *Definitely less than I used to*  
43

44  
45 *Only occasionally*  
46

47  
48 *Hardly at all*  
49

50  
51 6.  
52

53  
54 13.  
55

56  
57 *I feel cheerful:*  
58  
59  
60



1  
2  
3  
4  
5  
6  
7  
8  
9  
10  
11  
12  
13  
14  
15  
16  
17  
18  
19  
20  
21  
22  
23  
24  
25  
26  
27  
28  
29  
30  
31  
32  
33  
34  
35  
36  
37  
38  
39  
40  
41  
42  
43  
44  
45  
46  
47  
48  
49  
50  
51  
52  
53  
54  
55  
56  
57  
58  
59  
60

*I get sudden feelings of panic:*

*Not at all*

*Very often indeed*

*Not often*

*Quite often*

*Sometimes*

*Not very often*

*Most of the time*

*Not at all*

7.

14.

*I can sit at ease and feel relaxed:*

*I can enjoy a good book or radio or TV  
program:*

*Definitely*

*Often*

*Usually*

*Sometimes*

*Not Often*

For peer review only

1  
2  
3  
4  
5  
6  
7  
8  
9  
10  
11  
12  
13  
14  
15  
16  
17  
18  
19  
20  
21  
22  
23  
24  
25  
26  
27  
28  
29  
30  
31  
32  
33  
34  
35  
36  
37  
38  
39  
40  
41  
42  
43  
44  
45  
46  
47  
48  
49  
50  
51  
52  
53  
54  
55  
56  
57  
58  
59  
60

*Not often*

*Not at all*

*Very seldom*

*Qx . I experience a general sense of emptiness*

- *Not ever*
- *Rarely*
- *Sometimes*
- *Often*

*Qy. There are plenty of people I can rely on when I have problems*

- *Not ever*
- *Rarely*
- *Sometimes*
- *Often*

*Qz. I miss having people around me*

- *Not ever*
- *Rarely*
- *Sometimes*
- *Often*

*Please check you have answered all the questions above.*

*b) For each of the 17 mood questions above, please also indicate if you are feeling or experiencing this 1, less than; 2, the same as; or 3, more than before social isolation was implemented.*

*<1> [1 or 2 or 3]*

*<2> [1 or 2 or 3]*

*<3> [1 or 2 or 3]*

*<4> [1 or 2 or 3]*

*<5> [1 or 2 or 3]*

*<6> [1 or 2 or 3]*

*<7> [1 or 2 or 3]*

*<8> [1 or 2 or 3]*

*<9> [1 or 2 or 3]*

*<10> [1 or 2 or 3]*

1  
2  
3 <11> [1 or 2 or 3]  
4  
5 <12> [1 or 2 or 3]  
6  
7 <13> [1 or 2 or 3]  
8  
9 <14> [1 or 2 or 3]  
10  
11 <15> [1 or 2 or 3]  
12  
13 <16> [1 or 2 or 3]  
14  
15  
16  
17 Q. People may have worries about Covid-19. Have you been worried about any of  
18 the following and, if so, how much?  
19  
20  
21 Not at all  
22 Little  
23 Some  
24 Rather  
25 much  
26 Very  
27 much  
28  
29  
30 Getting Covid-19 infection and/or infecting  
31 someone else  
32  
33  
34  
35  
36  
37  
38  
39  
40 That a person close to me could get infected  
41 with Covid-19  
42  
43  
44  
45  
46  
47  
48  
49  
50 Being discriminated against or avoided  
51 because of Covid-19  
52  
53  
54  
55  
56  
57  
58  
59  
60 Impact of the Covid-19 epidemic on my own

economy and/or loss of my employment

Economic impact of the Covid-19 epidemic  
on the global economy

The government's and/or health system's  
lack of ability to handle the Covid-19  
pandemic situation, including the shortage of  
food and other groceries

Imperial College Sleep Quality (ICSQ) Questionnaire

Instructions:

The following questions relate to your usual sleep habits for a period of one month before and during a period of reduced social contact. Your answers should indicate the most accurate reply for the majority of days and nights during these periods.

Please answer all questions.

1. During the period before reduced social contact, what time did you usually go to bed at night: bed-time was .....

1b) During the period of reduced social contact, what time have you usually gone to bed at night: bed-time is - .....

2. During the period before reduced social contact, how long (in minutes) did it usually take you to fall asleep each night: number of minutes - .....

2b) During the period of reduced social contact, how long (in minutes) has it usually taken you to fall asleep each night: number of minutes - .....

3. During the period before reduced social contact, what time did you usually get up in the morning: getting-up time was - .....

3b) During the period of reduced social contact, what time do you usually get up in the morning: getting-up time is - .....

4. During the period before reduced social contact, how many hours of actual sleep did you get at night? (This may be different from the number of hours you

1  
2  
3 spent in bed): hours of sleep per night - .....

4 4b) During the period of reduced social contact, how many hours of actual sleep do  
5 you get at night? (This may be different from the number of hours you spend in bed):  
6 hours of sleep per night - .....

7  
8 5. During the period before reduced social contact, how often did you have trouble  
9 sleeping because you could not get to sleep within 30 minutes:

10 o Not ever

11 o Less than once a week

12 o Once or twice a week

13 o Three or more times a week

14  
15  
16  
17 5b) During the period of reduced social contact, how often have you had trouble  
18 sleeping because you could not get to sleep within 30 minutes:

19 o Not ever

20 o Less than once a week

21 o Once or twice a week

22 o Three or more times a week

23  
24  
25 6. During the period before reduced social contact, did you experience poor sleep  
26 (restless and unable to sleep):

27 o Not ever

28 o Less than once a week

29 o Once or twice a week

30 o Three or more times a week

31  
32  
33 6b) During the period of reduced social contact, have you experienced poor sleep  
34 (restless and unable to sleep):

35 o Not ever

36 o Less than once a week

37 o Once or twice a week

38 o Three or more times a week

39  
40  
41 7a) During the period before reduced social contact, did you experience loneliness  
42 (felt isolated, with no companions):

43 o Not ever

44 o Rarely

45 o Sometimes

46 o Often

47  
48  
49 7b) During the period of reduced social contact, have you experienced loneliness  
50 (felt isolated, with no companions):

51 o Not ever

52 o Rarely

53 o Sometimes

54 o Often

55  
56  
57  
58  
59 7c) During the period of reduced social contact, have you experienced loneliness: 1,  
60

less than; 2, the same as; or 3, more than before social isolation was implemented

Select: [1 or 2 or 3]

### Functional Activities Questionnaire

For each of the tasks below please rate your ability to carry out the task/activity independently on the following scale:

1. I had no difficulty

2. I had some difficulty, but I completed the task/activity myself.

3. I need some assistance to complete the task/activity:

a) I did not need assistance prior to COVID-19 lockdown but need assistance now to maintain social isolation/distancing

b) I could do the task/activity before the COVID-19 lockdown, but now would need assistance even if it were not to maintain social distancing

c) I required assistance since before the COVID-19 lockdown

4. I needed others to do this for me,

a) I could do the task/activity myself or with assistance prior to COVID-19 lockdown but need others to do it for me to maintain social isolation/distancing

b) I could do the task/activity myself or with assistance before the COVID-19 lockdown, but now would need others to do it for me even if it were not to maintain social distancing

c) I required others to do it for me since before the COVID-19 lockdown

5. I am unsure if I require assistance (e.g., never did the task/activity or have not done the task/activity over the past week)

Activities:

1. Writing cheques, paying bills, balancing cheque book, using an ATM cash machine

Response: .....

2. Assembling tax records, business affairs, or papers

Response: .....

3. Shopping alone for household necessities, medicines or groceries

Response: .....

4. Playing a game of skill, working on a hobby

Response: .....

5. Heating water, making a cup of coffee, turning off stove after use

Response: .....

1  
2  
3  
4  
5  
6  
7  
8  
9  
10  
11  
12  
13  
14  
15  
16  
17  
18  
19  
20  
21  
22  
23  
24  
25  
26  
27  
28  
29  
30  
31  
32  
33  
34  
35  
36  
37  
38  
39  
40  
41  
42  
43  
44  
45  
46  
47  
48  
49  
50  
51  
52  
53  
54  
55  
56  
57  
58  
59  
60

6. *Preparing a balanced meal*

Response: .....

7. *Keeping track of current events*

Response: .....

8. *Paying attention to, understanding, discussing TV, video, book, magazine*

Response: .....

9. *Remembering appointments, family occasions, public holidays, to take medications*

Response: .....

10. *Travelling out of my neighbourhood by taxi, car, bus or train and making travel arrangements.*

Response: .....

**THANK YOU FOR COMPLETING THIS QUESTIONNAIRE. YOUR RESPONSES HAVE BEEN SAVED AND SENT TO THE STUDY TEAM.**

NHS health advice and information regarding the novel coronavirus can be found here: <https://www.nhs.uk/conditions/coronavirus-covid-19/>

For Advice on Mental health we suggest using these links:

1. The NHS Every Mind Matters website has information on how to look after your mental wellbeing while in isolation: <https://www.nhs.uk/oneyou/every-mind-matters/>

2. The charity Mental Health UK have advice on managing mental health during the coronavirus outbreak: <https://mentalhealth-uk.org/help-and-information/covid-19-and-your-mental-health/>

3. The NHS recommends a range of mobile apps to help with mental wellbeing, many of which are free to download: <https://www.nhs.uk/apps-library/category/mental-health/>

4. If you need someone to talk to about your mental health, the charity Samaritans have a helpline available 24 hours a day, 7 days a week:

a. Call: 116 123

b. or visit: <https://www.samaritans.org/how-we-can-help/contact-samaritan/>

For Advice on Physical activity we suggest using these links:

1. The NHS Live Well website has a range of free advice and programmes from light activity to more strenuous exercises for those aged under 65: <https://www.nhs.uk/live-well/exercise/>

2. The NHS Live Well website has a range of free advice and programmes from light activity to more strenuous exercises for those aged 65 or older: <https://www.nhs.uk/live-well/exercise/physical-activity-guidelines-older-adults/>

3. Tips, advice and guidance from Sport England on how to keep or get active in and around your home: <https://www.sportengland.org/stayinworkout>

1  
2  
3  
4 4. *Stay Active at Home: a simple set of exercises designed for older people to*  
5 *stay active at home: [https://www.csp.org.uk/public-patient/keeping-active-and-](https://www.csp.org.uk/public-patient/keeping-active-and-healthy/staying-healthy-you-age/staying-strong-you-age/strength)*  
6 *healthy/staying-healthy-you-age/staying-strong-you-age/strength*  
7

8 *For Advice on Sleep we suggest using these links:*  
9

10 1. *The NHS ten top tips to improve sleep: [https://www.nhs.uk/live-well/sleep-and-](https://www.nhs.uk/live-well/sleep-and-tiredness/10-tips-to-beat-insomnia/)*  
11 *tiredness/10-tips-to-beat-insomnia/*

12 2. *The NHS recommends a range of mobile apps to help with sleep:*  
13 *<https://www.nhs.uk/apps-library/category/sleep/>*  
14  
15  
16  
17

18  
19 Supplementary Table 1: CCRR survey  
20  
21  
22  
23  
24  
25  
26  
27  
28  
29  
30  
31  
32  
33  
34  
35  
36  
37  
38  
39  
40  
41  
42  
43  
44  
45  
46  
47  
48  
49  
50  
51  
52  
53  
54  
55  
56  
57  
58  
59  
60



**STROBE 2007 (v4) checklist of items to be included in reports of observational studies in epidemiology\***  
**Checklist for cohort, case-control, and cross-sectional studies (combined)**

| Section/Topic             | Item # | Recommendation                                                                                                                                                                                                                                                                                                                                                                                                                                                         | Reported on page # |
|---------------------------|--------|------------------------------------------------------------------------------------------------------------------------------------------------------------------------------------------------------------------------------------------------------------------------------------------------------------------------------------------------------------------------------------------------------------------------------------------------------------------------|--------------------|
| Title and abstract        | 1      | (a) Indicate the study’s design with a commonly used term in the title or the abstract                                                                                                                                                                                                                                                                                                                                                                                 | 1                  |
|                           |        | (b) Provide in the abstract an informative and balanced summary of what was done and what was found                                                                                                                                                                                                                                                                                                                                                                    | 4                  |
| <b>Introduction</b>       |        |                                                                                                                                                                                                                                                                                                                                                                                                                                                                        |                    |
| Background/rationale      | 2      | Explain the scientific background and rationale for the investigation being reported                                                                                                                                                                                                                                                                                                                                                                                   | 5                  |
| Objectives                | 3      | State specific objectives, including any pre-specified hypotheses                                                                                                                                                                                                                                                                                                                                                                                                      | 5                  |
| <b>Methods</b>            |        |                                                                                                                                                                                                                                                                                                                                                                                                                                                                        |                    |
| Study design              | 4      | Present key elements of study design early in the paper                                                                                                                                                                                                                                                                                                                                                                                                                | 5                  |
| Setting                   | 5      | Describe the setting, locations, and relevant dates, including periods of recruitment, exposure, follow-up, and data collection                                                                                                                                                                                                                                                                                                                                        | 5-6                |
| Participants              | 6      | (a) <i>Cohort study</i> —Give the eligibility criteria, and the sources and methods of selection of participants. Describe methods of follow-up<br><i>Case-control study</i> —Give the eligibility criteria, and the sources and methods of case ascertainment and control selection. Give the rationale for the choice of cases and controls<br><i>Cross-sectional study</i> —Give the eligibility criteria, and the sources and methods of selection of participants | 5-6                |
|                           |        | (b) <i>Cohort study</i> —For matched studies, give matching criteria and number of exposed and unexposed<br><i>Case-control study</i> —For matched studies, give matching criteria and the number of controls per case                                                                                                                                                                                                                                                 |                    |
| Variables                 | 7      | Clearly define all outcomes, exposures, predictors, potential confounders, and effect modifiers. Give diagnostic criteria, if applicable                                                                                                                                                                                                                                                                                                                               | 6                  |
| Data sources/ measurement | 8*     | For each variable of interest, give sources of data and details of methods of assessment (measurement). Describe comparability of assessment methods if there is more than one group                                                                                                                                                                                                                                                                                   | 6-7                |
| Bias                      | 9      | Describe any efforts to address potential sources of bias                                                                                                                                                                                                                                                                                                                                                                                                              | 6-7                |
| Study size                | 10     | Explain how the study size was arrived at                                                                                                                                                                                                                                                                                                                                                                                                                              | 6                  |
| Quantitative variables    | 11     | Explain how quantitative variables were handled in the analyses. If applicable, describe which groupings were chosen and why                                                                                                                                                                                                                                                                                                                                           | 6-7                |
| Statistical methods       | 12     | (a) Describe all statistical methods, including those used to control for confounding                                                                                                                                                                                                                                                                                                                                                                                  | 6-7                |
|                           |        | (b) Describe any methods used to examine subgroups and interactions                                                                                                                                                                                                                                                                                                                                                                                                    | 6-7                |
|                           |        | (c) Explain how missing data were addressed                                                                                                                                                                                                                                                                                                                                                                                                                            | 6-7                |
|                           |        | (d) <i>Cohort study</i> —If applicable, explain how loss to follow-up was addressed<br><i>Case-control study</i> —If applicable, explain how matching of cases and controls was addressed                                                                                                                                                                                                                                                                              | NA                 |

|                          |     |                                                                                                                                                                                                              |                       |
|--------------------------|-----|--------------------------------------------------------------------------------------------------------------------------------------------------------------------------------------------------------------|-----------------------|
|                          |     | <i>Cross-sectional study</i> —If applicable, describe analytical methods taking account of sampling strategy                                                                                                 |                       |
|                          |     | (e) Describe any sensitivity analyses                                                                                                                                                                        | NA                    |
| <b>Results</b>           |     |                                                                                                                                                                                                              |                       |
| Participants             | 13* | (a) Report numbers of individuals at each stage of study—eg numbers potentially eligible, examined for eligibility, confirmed eligible, included in the study, completing follow-up, and analysed            | 6                     |
|                          |     | (b) Give reasons for non-participation at each stage                                                                                                                                                         | NA                    |
|                          |     | (c) Consider use of a flow diagram                                                                                                                                                                           | NA                    |
| Descriptive data         | 14* | (a) Give characteristics of study participants (eg demographic, clinical, social) and information on exposures and potential confounders                                                                     | 7                     |
|                          |     | (b) Indicate number of participants with missing data for each variable of interest                                                                                                                          | Table 1               |
|                          |     | (c) <i>Cohort study</i> —Summarise follow-up time (eg, average and total amount)                                                                                                                             | NA: baseline analysis |
| Outcome data             | 15* | <i>Cohort study</i> —Report numbers of outcome events or summary measures over time                                                                                                                          | NA: baseline analysis |
|                          |     | <i>Case-control study</i> —Report numbers in each exposure category, or summary measures of exposure                                                                                                         |                       |
|                          |     | <i>Cross-sectional study</i> —Report numbers of outcome events or summary measures                                                                                                                           |                       |
| Main results             | 16  | (a) Give unadjusted estimates and, if applicable, confounder-adjusted estimates and their precision (eg, 95% confidence interval). Make clear which confounders were adjusted for and why they were included | 7-9                   |
|                          |     | (b) Report category boundaries when continuous variables were categorized                                                                                                                                    | 7-9                   |
|                          |     | (c) If relevant, consider translating estimates of relative risk into absolute risk for a meaningful time period                                                                                             | NA                    |
| Other analyses           | 17  | Report other analyses done—eg analyses of subgroups and interactions, and sensitivity analyses                                                                                                               | 7-9                   |
| <b>Discussion</b>        |     |                                                                                                                                                                                                              |                       |
| Key results              | 18  | Summarise key results with reference to study objectives                                                                                                                                                     | 10                    |
| Limitations              | 19  | Discuss limitations of the study, taking into account sources of potential bias or imprecision. Discuss both direction and magnitude of any potential bias                                                   | 12-13                 |
| Interpretation           | 20  | Give a cautious overall interpretation of results considering objectives, limitations, multiplicity of analyses, results from similar studies, and other relevant evidence                                   | 10-12                 |
| Generalisability         | 21  | Discuss the generalisability (external validity) of the study results                                                                                                                                        | 10-12                 |
| <b>Other information</b> |     |                                                                                                                                                                                                              |                       |
| Funding                  | 22  | Give the source of funding and the role of the funders for the present study and, if applicable, for the original study on which the present article is based                                                | 2                     |

\*Give information separately for cases and controls in case-control studies and, if applicable, for exposed and unexposed groups in cohort and cross-sectional studies.

**Note:** An Explanation and Elaboration article discusses each checklist item and gives methodological background and published examples of transparent reporting. The STROBE checklist is best used in conjunction with this article (freely available on the Web sites of PLoS Medicine at <http://www.plosmedicine.org/>, Annals of Internal Medicine at <http://www.annals.org/>, and Epidemiology at <http://www.epidem.com/>). Information on the STROBE Initiative is available at [www.strobe-statement.org](http://www.strobe-statement.org).
