# Supplementary material for: Impact of social restrictions during the COVID-19 pandemic on the physical activity levels of adults aged 50–92 years: a baseline survey of the CHARIOT COVID-19 Rapid Response prospective cohort study
Source: PubMed Central journal article supplement (PMC8390149; doi:10.1136/bmjopen-2021-050680), 2021-08-25
Supplement: bmjopen-2021-050680supp001.pdf [file bmjopen-2021-050680supp001.pdf]

## Supplementary file 1

### Supplementary methods

#### Metabolic Equivalent of Task (MET) calculation

Briefly, 1 MET equates to an individual's resting energy expenditure. According to the IPAQ scoring protocol, 3.3 METS is considered equivalent to walking, and moderate and vigorous activity to be 4 and 8 METS, respectively. To calculate the continuous variable of total MET minutes a week, the self-reported duration (minutes) and frequency (days) of each of these PA categories is multiplied by the by the specified metric.

For the purposes of regression analyses, employment status was re-categorised as per Table S1

### Supplementary figures and tables

Figure S1: Timeline of lockdown restrictions in the United Kingdom in 2020

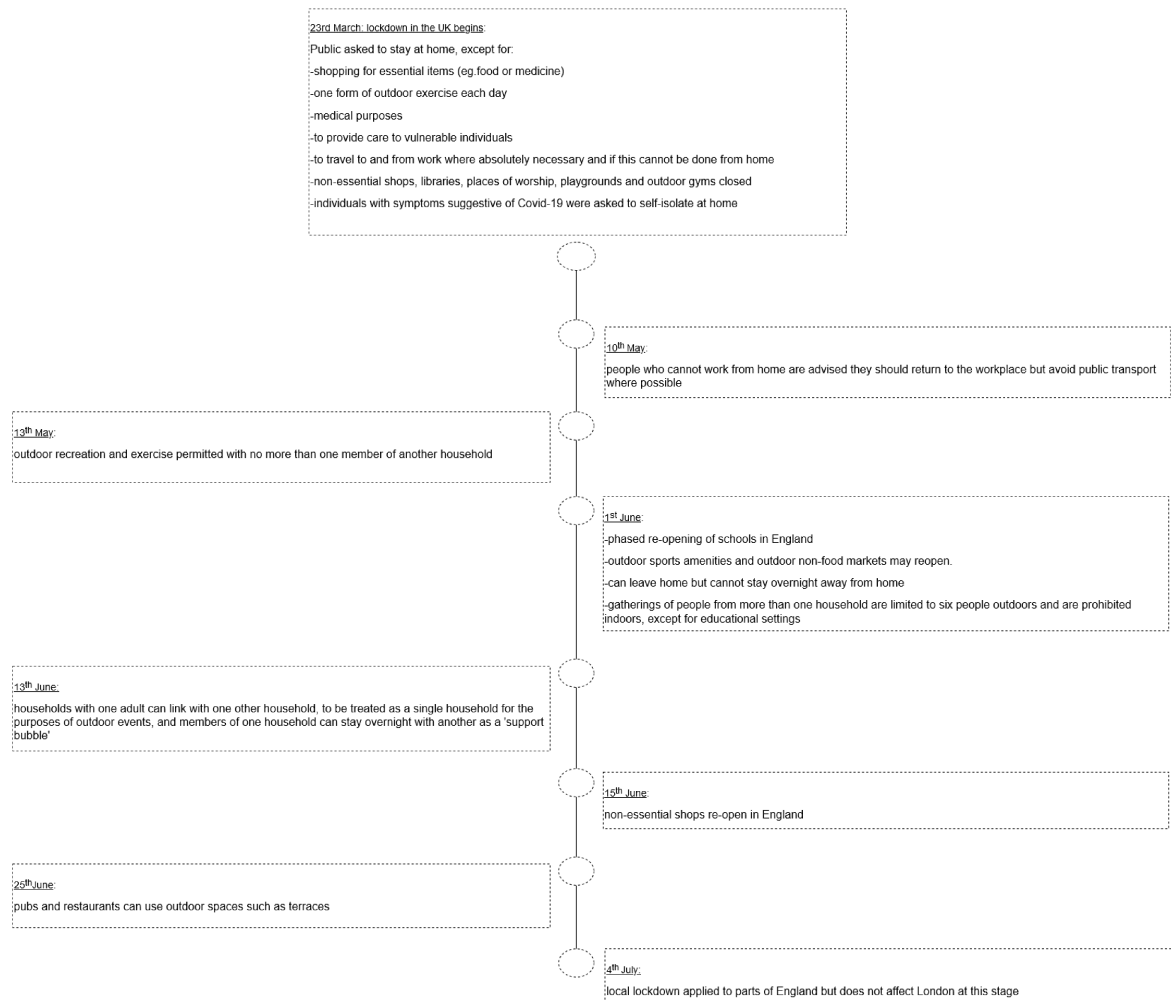

Gov.uk. UK Government COVID-19 guidance

Figure S2: Box-plot of distribution of MET minutes per week after introduction of lockdown by month of survey completion for 6,219 participants with completed IPAQ data

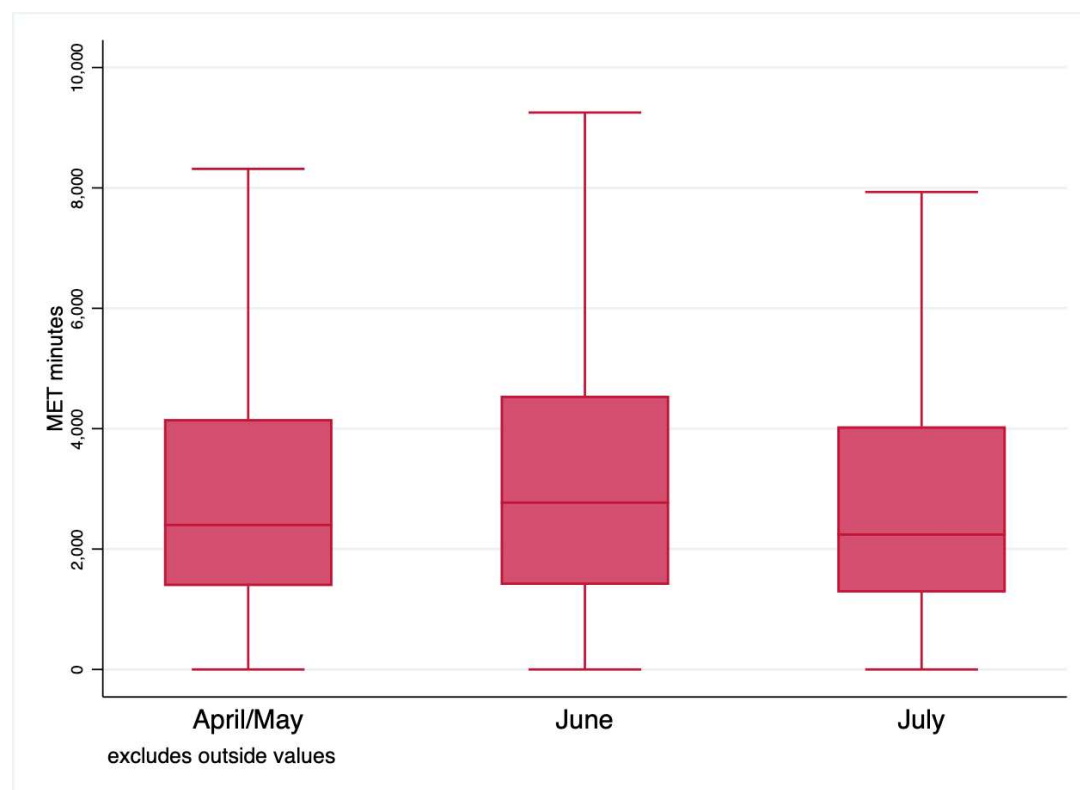

Table S1: Mean MET minutes after introduction of lockdown measures by month of survey completion

| Month      | Total | Percent | Mean MET minutes | p value <sup>¶</sup> |
|------------|-------|---------|------------------|----------------------|
| April/May* | 4975  | 80.0%   | 3139             | 0.0007               |
| June       | 994   | 16.0%   | 3470             |                      |
| July       | 250   | 4.0%    | 2967             |                      |

\* April (110) and May (4865) combined due to small numbers completed in April

<sup>¶</sup> p-value from linear regression models of MET minutes as dependent variable, against survey completion month as explanatory variable.

Table S2: Re-categorisation of employment status

| <b>Recategorised variable</b> | <b>Original variable(s)</b>                                                                                                                    |
|-------------------------------|------------------------------------------------------------------------------------------------------------------------------------------------|
| Retired                       | Retired                                                                                                                                        |
| Employed                      | A key worker<br>A student<br>Continuing to work in your usual job; at home<br>Continuing to work in your usual job and leave home for your job |
| Furloughed                    | Furloughed                                                                                                                                     |
| Unemployed                    | Had to close your business due to COVID-19<br>Lost my job due to the lockdown<br>Unemployed                                                    |
| Missing                       | None of the above                                                                                                                              |

Figure S3: Causal diagram representing factors impacting on change in physical activity after lockdown

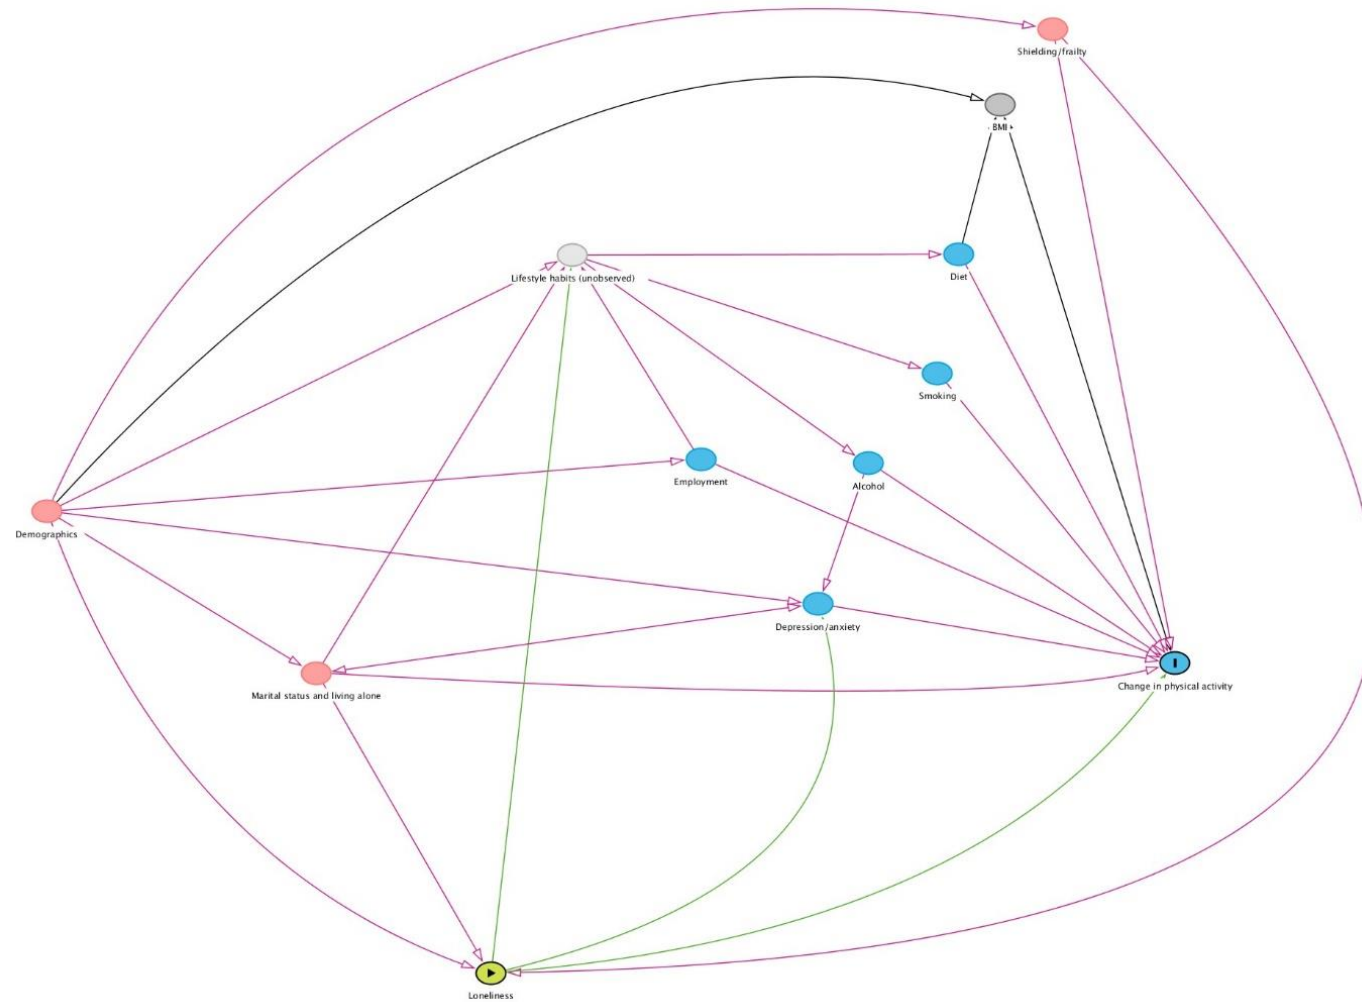

Figure S4: Box-plot of distribution of MET minutes per week before and after the introduction of lockdown for 6,219 participants with completed IPAQ data

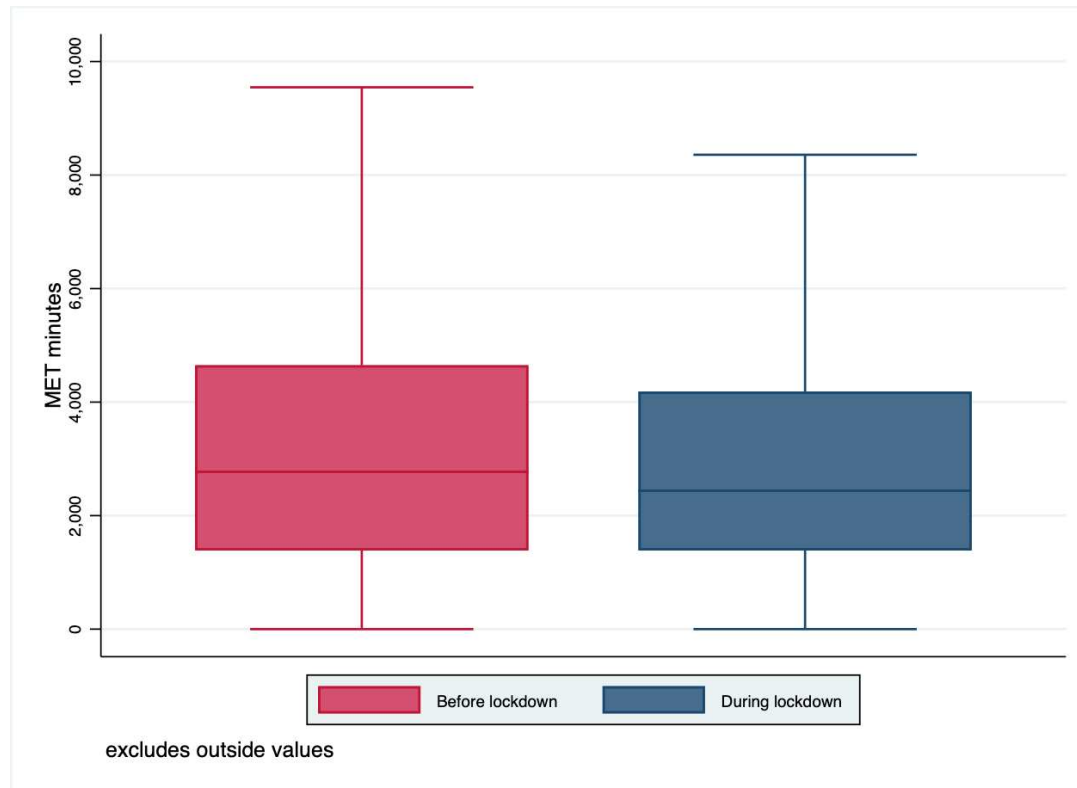

Figure S5: Box-plot of distribution of MET minutes per week before introduction of lockdown by month of survey completion for 6,219 participants with completed IPAQ data

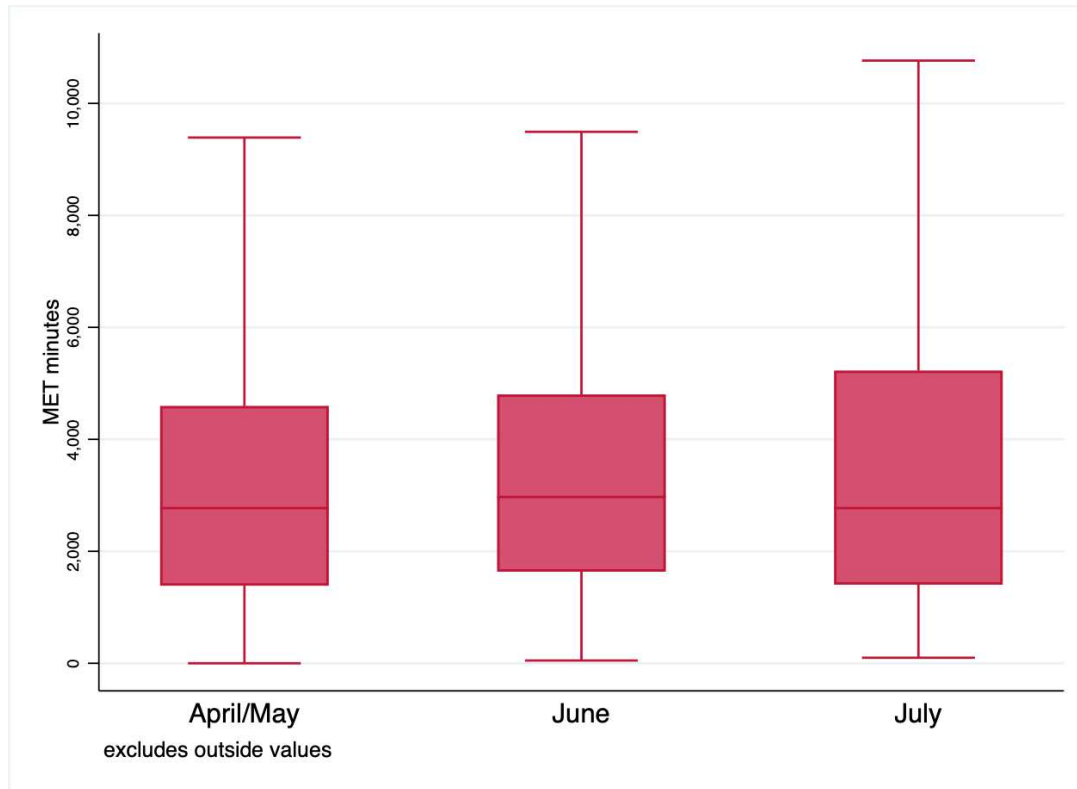

Linear regression models of MET minutes as dependent variable, against survey completion month as explanatory variable showed no significant association ( $p=0.1112$ ).

Table S3: Unadjusted associations in physical activity (MET minutes per week) after introduction of lockdown measures and change from before lockdown, from linear regression models. Note: negative values for change in activity indicate reduction after lockdown

| Predictor                             | Physical activity after lockdown (MET minutes/week) |                         |       |         | Change in physical activity from before lockdown (MET minutes/week) |                         |       |         |
|---------------------------------------|-----------------------------------------------------|-------------------------|-------|---------|---------------------------------------------------------------------|-------------------------|-------|---------|
|                                       | Mean                                                | 95% confidence interval |       | p value | Mean                                                                | 95% confidence interval |       | p value |
|                                       |                                                     | Lower                   | Upper |         |                                                                     | Lower                   | Upper |         |
| <b>Mean (whole cohort)</b>            | 3186                                                | 3120                    | 3253  | -       | -333                                                                | -396                    | -271  | -       |
| <b>Age (years)</b>                    |                                                     |                         |       |         |                                                                     |                         |       |         |
| 50-64                                 | 3341                                                | 3191                    | 3491  |         | -196                                                                | -338                    | -55   |         |
| 65-74                                 | 3201                                                | 3112                    | 3290  | <0.001  | -362                                                                | -446                    | -278  | 0.184   |
| 75-84                                 | 3092                                                | 2952                    | 3232  |         | -365                                                                | -497                    | -233  |         |
| 85+                                   | 2326                                                | 1863                    | 2790  |         | -503                                                                | -940                    | -66   |         |
| <b>Sex</b>                            |                                                     |                         |       |         |                                                                     |                         |       |         |
| Female                                | 3227                                                | 3138                    | 3317  | 0.180   | -450                                                                | -533                    | -366  | <0.001  |
| Male                                  | 3136                                                | 3036                    | 3235  |         | -189                                                                | -282                    | -95   |         |
| <b>Ethnicity</b>                      |                                                     |                         |       |         |                                                                     |                         |       |         |
| White                                 | 3196                                                | 3127                    | 3265  |         | -330                                                                | -394                    | -265  |         |
| Mixed/multiple ethnic groups          | 3346                                                | 2819                    | 3873  | 0.425   | -392                                                                | -887                    | 102   | 0.641   |
| Asian/Asian British                   | 2929                                                | 2530                    | 3327  |         | -326                                                                | -700                    | 48    |         |
| Black/African/Caribbean/Black British | 3351                                                | 2551                    | 4151  |         | 4                                                                   | -746                    | 754   |         |
| Other ethnic group                    | 2754                                                | 2099                    | 3410  |         | -740                                                                | -1355                   | -125  |         |
| <b>Body Mass Index category</b>       |                                                     |                         |       |         |                                                                     |                         |       |         |
| Underweight                           | 3815                                                | 3137                    | 4493  |         | -21                                                                 | -649                    | 607   |         |
| Healthy weight                        | 3569                                                | 3439                    | 3700  | <0.001  | -126                                                                | -247                    | -5    | 0.055   |
| Overweight                            | 3130                                                | 2959                    | 3300  |         | -363                                                                | -521                    | -204  |         |
| Obese                                 | 2590                                                | 2309                    | 2870  |         | -400                                                                | -659                    | -140  |         |



|                               |      |      |      |        |      |       |      |        |
|-------------------------------|------|------|------|--------|------|-------|------|--------|
| <b>Employment status</b>      |      |      |      |        |      |       |      |        |
| Employed                      | 3093 | 2950 | 3236 |        | -217 | -351  | -84  |        |
| Furloughed                    | 3496 | 3122 | 3870 | 0.118  | -488 | -838  | -139 | 0.101  |
| Unemployed                    | 3463 | 3031 | 3894 |        | -672 | -1076 | -268 |        |
| Retired                       | 3191 | 3111 | 3271 |        | -334 | -409  | -259 |        |
| <b>Marital status</b>         |      |      |      |        |      |       |      |        |
| Divorced/single/widowed       | 3026 | 2908 | 3143 | 0.001  | -540 | -650  | -430 | <0.001 |
| Living with a partner/married | 3262 | 3181 | 3342 |        | -236 | -312  | -161 |        |
| <b>Household</b>              |      |      |      |        |      |       |      |        |
| Not living alone              | 3262 | 3185 | 3340 | <0.001 | -240 | -313  | -168 | <0.001 |
| Living alone                  | 2983 | 2855 | 3110 |        | -582 | -702  | -463 |        |
| <b>Loneliness</b>             |      |      |      |        |      |       |      |        |
| Not ever                      | 3284 | 3188 | 3380 |        | -216 | -306  | -126 |        |
| Rarely                        | 3087 | 2951 | 3224 | 0.024  | -360 | -488  | -232 | <0.001 |
| Sometimes                     | 3155 | 3010 | 3300 |        | -481 | -617  | -345 |        |
| Often                         | 2938 | 2666 | 3210 |        | -762 | -1018 | -507 |        |
| <b>Shielding</b>              |      |      |      |        |      |       |      |        |
| Not shielding                 | 3273 | 3196 | 3350 | <0.001 | -243 | -315  | -171 | <0.001 |
| Shielding                     | 2942 | 2812 | 3072 |        | -588 | -710  | -466 |        |
| <b>Frailty</b>                |      |      |      |        |      |       |      |        |
| Robust                        | 3257 | 3183 | 3330 |        | -335 | -404  | -265 |        |
| Pre-frail                     | 2903 | 2746 | 3059 | <0.001 | -328 | -475  | -180 | 0.389  |
| Frail                         | 1952 | 1055 | 2849 |        | -925 | -1768 | -82  |        |
| <b>Alcohol drinker</b>        |      |      |      |        |      |       |      |        |
| No                            | 3044 | 2884 | 3203 | 0.054  | -485 | -634  | -335 | 0.029  |
| Yes                           | 3217 | 3143 | 3290 |        | -301 | -370  | -233 |        |
| <b>Smoker</b>                 |      |      |      |        |      |       |      |        |
| No                            | 3202 | 3135 | 3270 | 0.010  | -322 | -385  | -259 | 0.046  |
| Yes                           | 2696 | 2318 | 3074 |        | -689 | -1043 | -334 |        |

|                                                             |      |      |      |        |       |       |      |        |
|-------------------------------------------------------------|------|------|------|--------|-------|-------|------|--------|
| <b>Diet</b>                                                 |      |      |      |        |       |       |      |        |
| No change from usual - already had a healthy diet           | 3257 | 3183 | 3331 |        | -333  | -402  | -263 |        |
| My diet has become more healthy                             | 3314 | 3119 | 3509 | <0.001 | -55   | -238  | 129  | <0.001 |
| My diet was healthy before but has got worse since lockdown | 2523 | 2227 | 2818 |        | -890  | -1168 | -612 |        |
| No change from usual - my diet isn't very healthy           | 2009 | 1641 | 2377 |        | -479  | -825  | -133 |        |
| <b>HADS (depression score)</b>                              |      |      |      |        |       |       |      |        |
| Normal (0-7)                                                | 3195 | 3119 | 3270 | <0.001 | -293  | -365  | -222 | <0.001 |
| Borderline (8-10)                                           | 2787 | 2495 | 3079 |        | -676  | -953  | -399 |        |
| Abnormal (11-21)                                            | 2450 | 1971 | 2929 |        | -1450 | -1904 | -997 |        |
| <b>HADS (anxiety score)</b>                                 |      |      |      |        |       |       |      |        |
| Normal (0-7)                                                | 3123 | 3044 | 3201 | 0.150  | -312  | -386  | -237 | 0.004  |
| Borderline (8-10)                                           | 3343 | 3109 | 3577 |        | -348  | -570  | -125 |        |
| Abnormal (11-21)                                            | 3288 | 2971 | 3605 |        | -836  | -1137 | -535 |        |

\*HADS – Hospital Anxiety and Depression Score

Table S4: Results of multivariable linear regression models of physical activity after lockdown, adjusted for age, sex, ethnicity, month of survey completion and baseline physical activity. Data presented as mean MET minutes/week +/- 95% confidence interval compared to the reference group, with negative values indicating lower physical activity than the reference.

| Predictor                             | Physical activity after lockdown (MET minutes/week) | 95% confidence interval |       | p value | Number of observations |
|---------------------------------------|-----------------------------------------------------|-------------------------|-------|---------|------------------------|
|                                       |                                                     | Lower                   | Upper |         |                        |
| <b>Age (years)</b>                    |                                                     |                         |       |         |                        |
| 50-64 (reference)                     | -                                                   | -                       | -     |         |                        |
| 65-74                                 | -154                                                | -296                    | -12   | <0.001  | 6155                   |
| 75-84                                 | -213                                                | -380                    | -46   |         |                        |
| 85+                                   | -640                                                | -1034                   | -246  |         |                        |
| <b>Sex</b>                            |                                                     |                         |       |         |                        |
| Female (reference)                    | -                                                   | -                       | -     | 0.053   | 6155                   |
| Male                                  | 108                                                 | -1                      | 216   |         |                        |
| <b>Ethnicity</b>                      |                                                     |                         |       |         |                        |
| White (reference)                     | -                                                   | -                       | -     |         |                        |
| Mixed/multiple ethnic groups          | -14                                                 | -442                    | 415   | 0.517   | 6155                   |
| Asian/Asian British                   | -136                                                | -463                    | 191   |         |                        |
| Black/African/Caribbean/Black British | 248                                                 | -398                    | 894   |         |                        |
| Other ethnic group                    | -435                                                | -969                    | 100   |         |                        |
| <b>Body Mass Index category</b>       |                                                     |                         |       |         |                        |
| Underweight                           | 153                                                 | -411                    | 717   |         |                        |
| Healthy weight (reference)            | -                                                   | -                       | -     | 0.030   | 2987                   |
| Overweight                            | -341                                                | -518                    | -165  |         |                        |
| Obese                                 | -578                                                | -832                    | -324  |         |                        |
| <b>Employment status</b>              |                                                     |                         |       |         |                        |
| Employed (reference)                  | -                                                   | -                       | -     | 0.905   | 5958                   |
| Furloughed                            | 47                                                  | -278                    | 372   |         |                        |
| Unemployed                            | -110                                                | -480                    | 259   |         |                        |

|                                                               |      |       |      |        |      |
|---------------------------------------------------------------|------|-------|------|--------|------|
| Retired                                                       | 99   | -48   | 246  |        |      |
| <b>Marital status</b>                                         |      |       |      |        |      |
| Divorced/single/widowed (reference)                           | -    | -     | -    | <0.001 | 6155 |
| Living with a partner/married                                 | 240  | 120   | 360  |        |      |
| <b>Household</b>                                              |      |       |      |        |      |
| Not living alone (reference)                                  | -    | -     | -    | <0.001 | 6155 |
| Living alone                                                  | -277 | -402  | -152 |        |      |
| <b>Loneliness</b>                                             |      |       |      |        |      |
| Not ever (reference)                                          | -    | -     | -    |        |      |
| Rarely                                                        | -161 | -297  | -25  | <0.001 | 6077 |
| Sometimes                                                     | -186 | -329  | -42  |        |      |
| Often                                                         | -452 | -688  | -217 |        |      |
| <b>Shielding</b>                                              |      |       |      |        |      |
| Not shielding (reference)                                     | -    | -     | -    | <0.001 | 6155 |
| Shielding                                                     | -290 | -417  | -163 |        |      |
| <b>Frailty</b>                                                |      |       |      |        |      |
| Robust (reference)                                            | -    | -     | -    |        |      |
| Pre-frail                                                     | -160 | -301  | -19  | 0.005  | 6142 |
| Frail                                                         | -926 | -1663 | -189 |        |      |
| <b>Alcohol drinker</b>                                        |      |       |      |        |      |
| No (reference)                                                | -    | -     | -    | 0.049  | 6155 |
| Yes                                                           | 145  | 1     | 289  |        |      |
| <b>Smoker</b>                                                 |      |       |      |        |      |
| No (reference)                                                |      |       |      | 0.005  | 6155 |
| Yes                                                           | -451 | -762  | -140 |        |      |
| <b>Diet</b>                                                   |      |       |      |        |      |
| No change from usual - already had a healthy diet (reference) | -    | -     | -    |        |      |
| My diet has become more healthy                               | 156  | -13   | 326  | <0.001 | 6155 |
| My diet was healthy before but has got worse since lockdown   | -662 | -910  | -414 |        |      |

|                                                   |       |       |      |        |      |
|---------------------------------------------------|-------|-------|------|--------|------|
| No change from usual - my diet isn't very healthy | -667  | -975  | -359 |        |      |
| <b>HADS (depression score)</b>                    |       |       |      |        |      |
| Normal (0-7) (reference)                          | -     | -     | -    |        |      |
| Borderline (8-10)                                 | -408  | -654  | -163 | <0.001 | 5038 |
| Abnormal (11-21)                                  | -1007 | -1401 | -612 |        |      |
| <b>HADS (anxiety score)</b>                       |       |       |      |        |      |
| Normal (0-7) (reference)                          | -     | -     | -    |        |      |
| Borderline (8-10)                                 | 94    | -109  | 296  | 0.478  | 5038 |
| Abnormal (11-21)                                  | -220  | -486  | 47   |        |      |

HADS – Hospital Anxiety and Depression Score

Table S5: Multivariable linear regression model for physical activity after lockdown with loneliness, adjusted for age, sex, ethnicity, month of survey completion, baseline physical activity, living alone, marital status, shielding and frailty

| Predictor            | Physical activity after lockdown (MET minutes/week) | 95% confidence interval |       | p value | Number of observations |
|----------------------|-----------------------------------------------------|-------------------------|-------|---------|------------------------|
|                      |                                                     | Lower                   | Upper |         |                        |
| <b>Loneliness</b>    |                                                     |                         |       |         |                        |
| Not ever (reference) | -                                                   | -                       | -     | 0.007   | 6077                   |
| Rarely               | -127                                                | -265                    | 11    |         |                        |
| Sometimes            | -107                                                | -256                    | 42    |         |                        |
| Often                | -306                                                | -552                    | -60   |         |                        |

Adjusted: age, sex, ethnicity, month of survey completion, baseline physical activity, living alone, marital status, shielding, frailty
